# Supplementary material
Source: PubMed Central journal article supplement (PMC2819066)

snb-1-142-a

exp1 s2pu1

| SAMPLE      |            | DEC. & VT |        |
|-------------|------------|-----------|--------|
| date        | Nov 2 2009 | dn        | F19    |
| solvent     | cdc13      | dof       | 0      |
| file        | exp        | dm        | nnn    |
| ACQUISITION |            |           |        |
| sfrq        | 499.859    | dmm       | c      |
| tn          | H1         | dmf       | 200    |
| at          | 2.732      | temp      | 22.0   |
| PROCESSING  |            |           |        |
| np          | 32768      | lb        | 0.20   |
| sw          | 5897.0     | fn        | 32768  |
| fb          | 3000       | math      | 1      |
| bs          | 4          |           |        |
| pw          | 10.0       | werr      |        |
| pw          | 10.0       | wexp      | wft    |
| tpwr        | 53         | wbs       |        |
| d1          | 4.000      | wnt       |        |
| tof         | 0          |           |        |
| DISPLAY     |            |           |        |
| nt          | 4          | sp        | -80.0  |
| ct          | 4          | wp        | 4215.9 |
| alock       | n          | vs        | 70     |
| gain        | not used   | sc        | 0      |
| FLAGS       |            |           |        |
|             |            | wc        | 250    |
| il          | n          | hzmm      | 16.86  |
| in          | n          | ls        | 130.11 |
| dp          | y          | rfl       | 4130.6 |
| hs          | nn         | rff       | 5629.0 |
|             |            | th        | 2      |
|             |            | ins       | 1.000  |
|             | ai         | ph        |        |

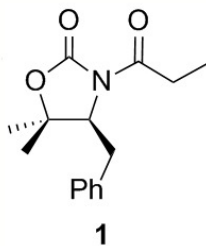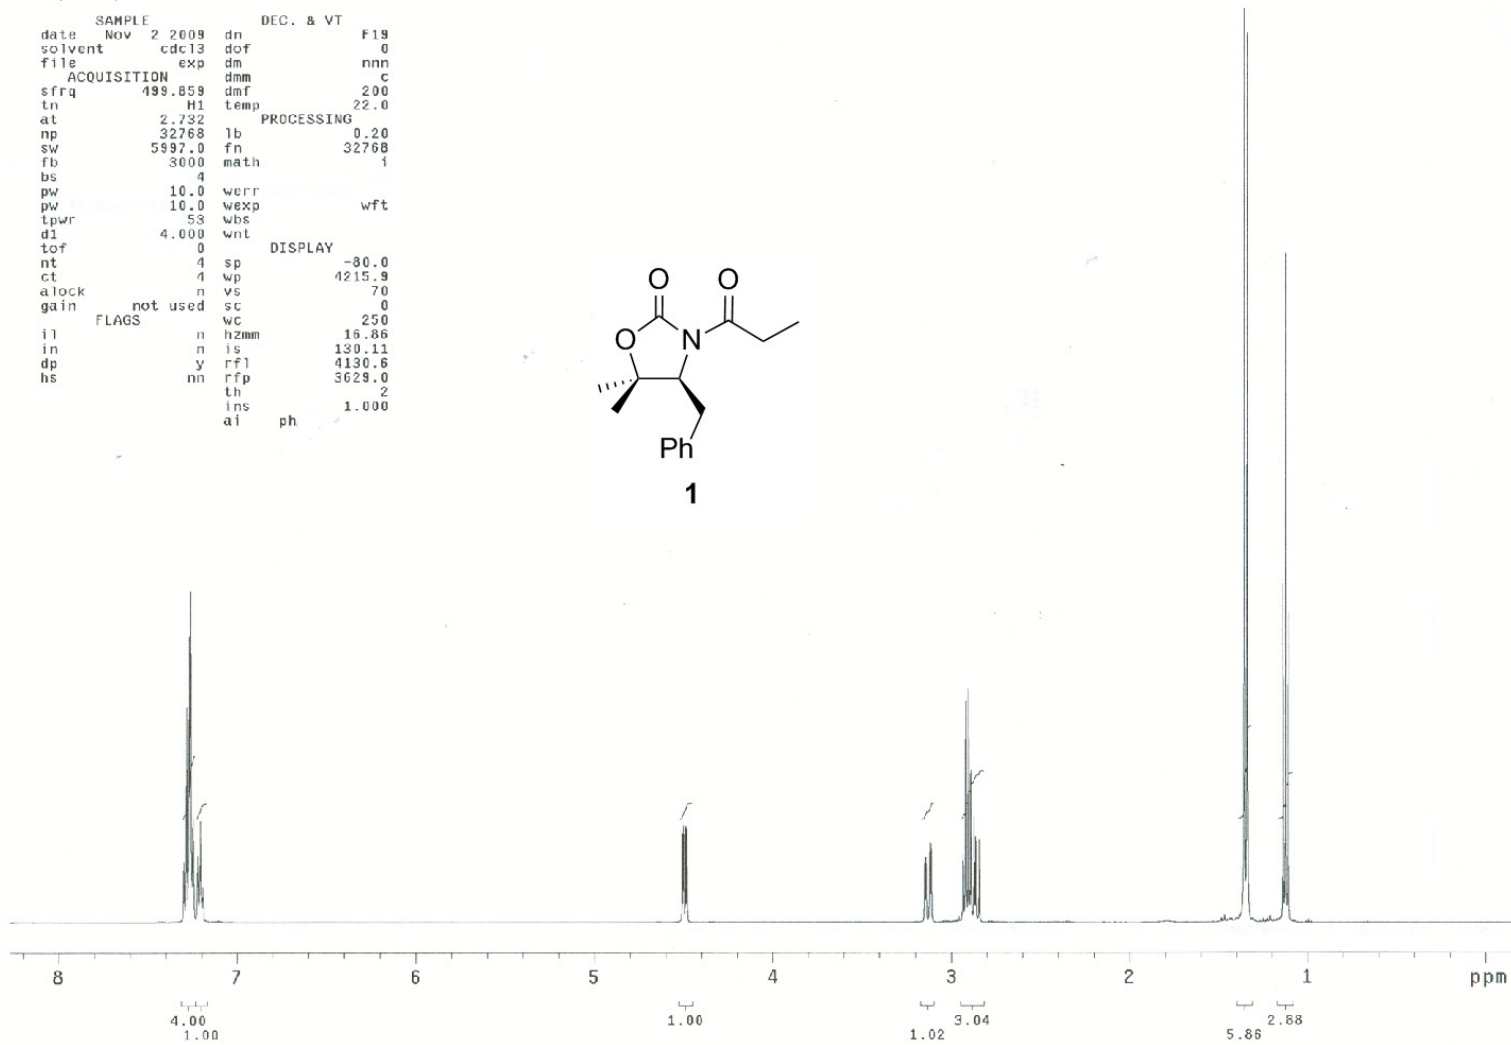

snb-2-078-a-13C

exp1 CARBON

| SAMPLE      |             | SPECIAL    |          |
|-------------|-------------|------------|----------|
| date        | Nov 2, 2009 | temp       | 22.0     |
| solvent     | CDC13       | gain       | 42       |
| file        | exp         | spin       | 20       |
| ACQUISITION |             | SPECIAL    |          |
| sw          | 36003.6     | hst        | 0.008    |
| at          | 1.300       | pw90       | 9.200    |
| np          | 93644       | alfa       | 10.000   |
| fb          | 20000       | FLAGS      |          |
| bs          | 4           | il         | n        |
| d1          | 1.000       | in         | n        |
| nt          | 128         | dp         | y        |
| ct          | 19          | hs         | nn       |
| TRANSMITTER |             | PROCESSING |          |
| tn          | C13         | fb         | 0.50     |
| sfrq        | 125.702     | fn         | not used |
| tof         | 865.4       | DISPLAY    |          |
| tpwr        | 56          | sp         | -268.0   |
| pw          | 9.200       | wp         | 25430.9  |
| DECOUPLER   |             | rfl        | 14918.7  |
| dn          | H1          | rfp        | 9707.0   |
| dof         | 0           | rp         | 51.2     |
| dm          | nny         | lp         | -293.5   |
| decwave     |             | PLOT       |          |
| dpwr        | 36          | wc         | 250      |
| dmf         | 10104       | sc         | 0        |
|             |             | vs         | 1201     |
|             |             | th         | 5        |
|             |             | ai         | cdc ph   |

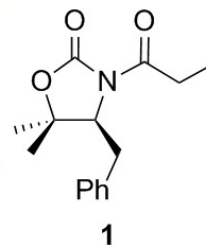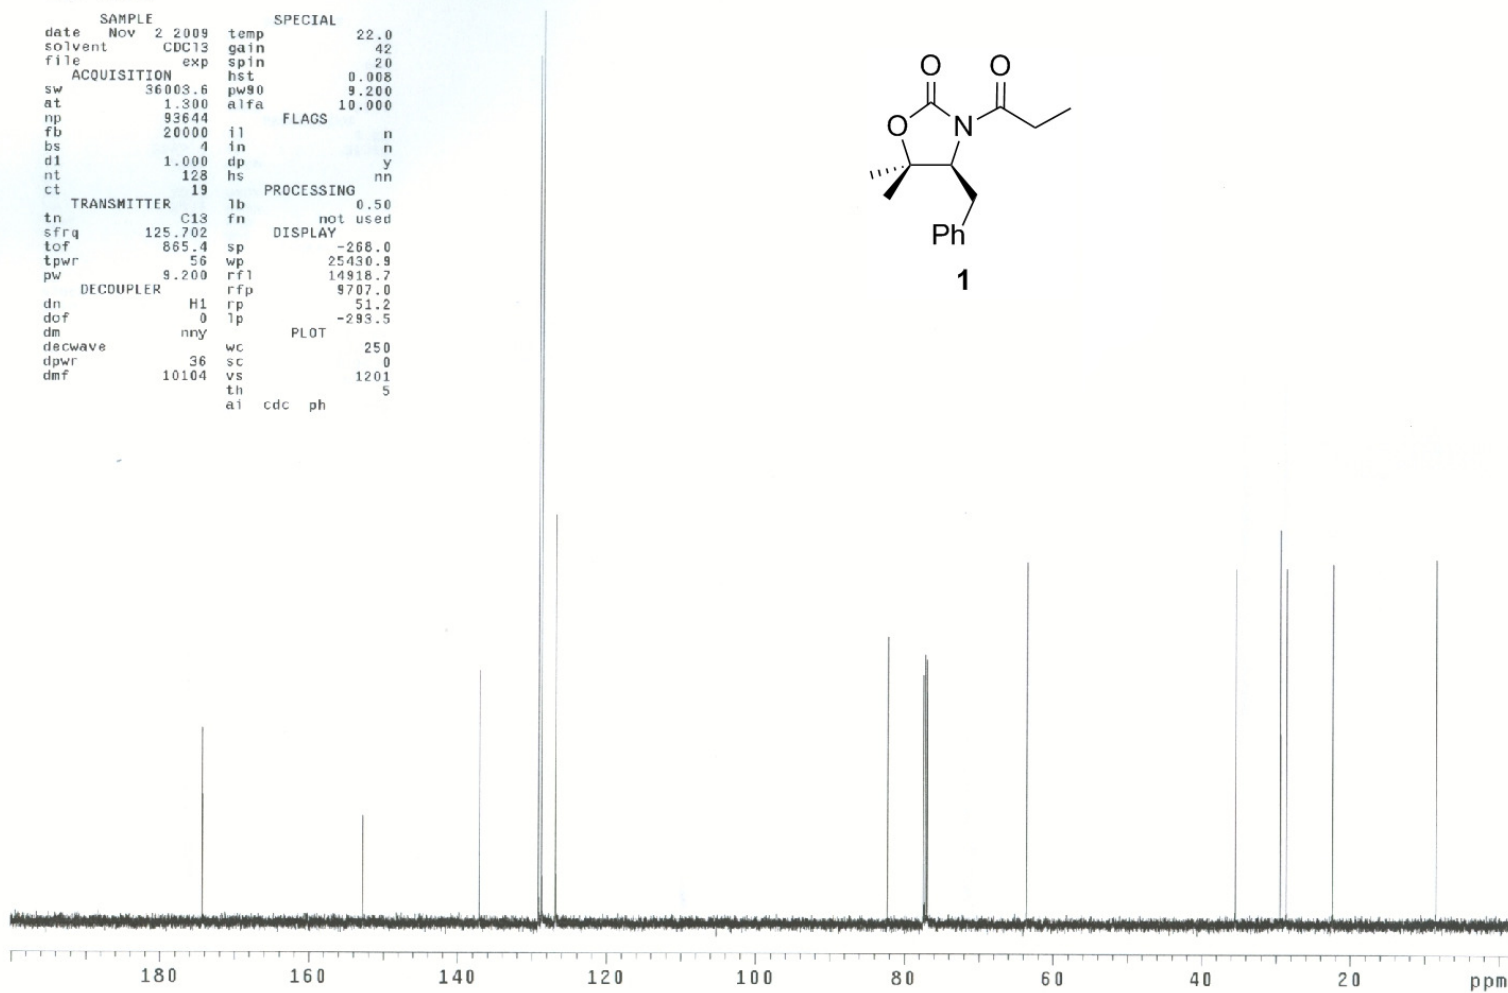

snb-1-232-a

exp1 s2pu1

| SAMPLE      |            | DEC. & VT  |         |
|-------------|------------|------------|---------|
| date        | Jul 3 2009 | dn         | H1      |
| solvent     | cdcl3      | dof        | -1425.0 |
| file        | exp        | dm         | nnn     |
| ACQUISITION |            | PROCESSING |         |
| sfrq        | 399.951    | dmm        | c       |
| tn          | H1         | dmf        | 200     |
| at          | 2.003      | lb         | 0.10    |
| np          | 20032      | fn         | 32768   |
| sw          | 5000.0     | math       | 1       |
| fb          | 3000       |            |         |
| bs          | 4          | werr       |         |
| pw          | 12.0       | wexp       |         |
| pw          | 12.0       | wbs        |         |
| tpwr        | 57         | wnt        |         |
| d1          | 1.000      | DISPLAY    |         |
| tof         | 0          | sp         | -163.0  |
| nt          | 8          | wp         | 3808.8  |
| ct          | 8          | vs         | 91      |
| alock       | n          | sc         | 0       |
| gain        | not used   | wc         | 250     |
| FLAGS       |            | hzmm       | 15.24   |
| fl          | n          | is         | 353.21  |
| in          | n          | rfl        | 495.8   |
| dp          | y          | rff        | 0       |
| hs          | nn         | th         | 1       |
|             |            | ins        | 1.000   |
|             |            | ai         | ph      |

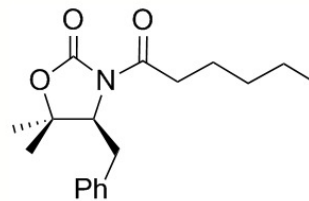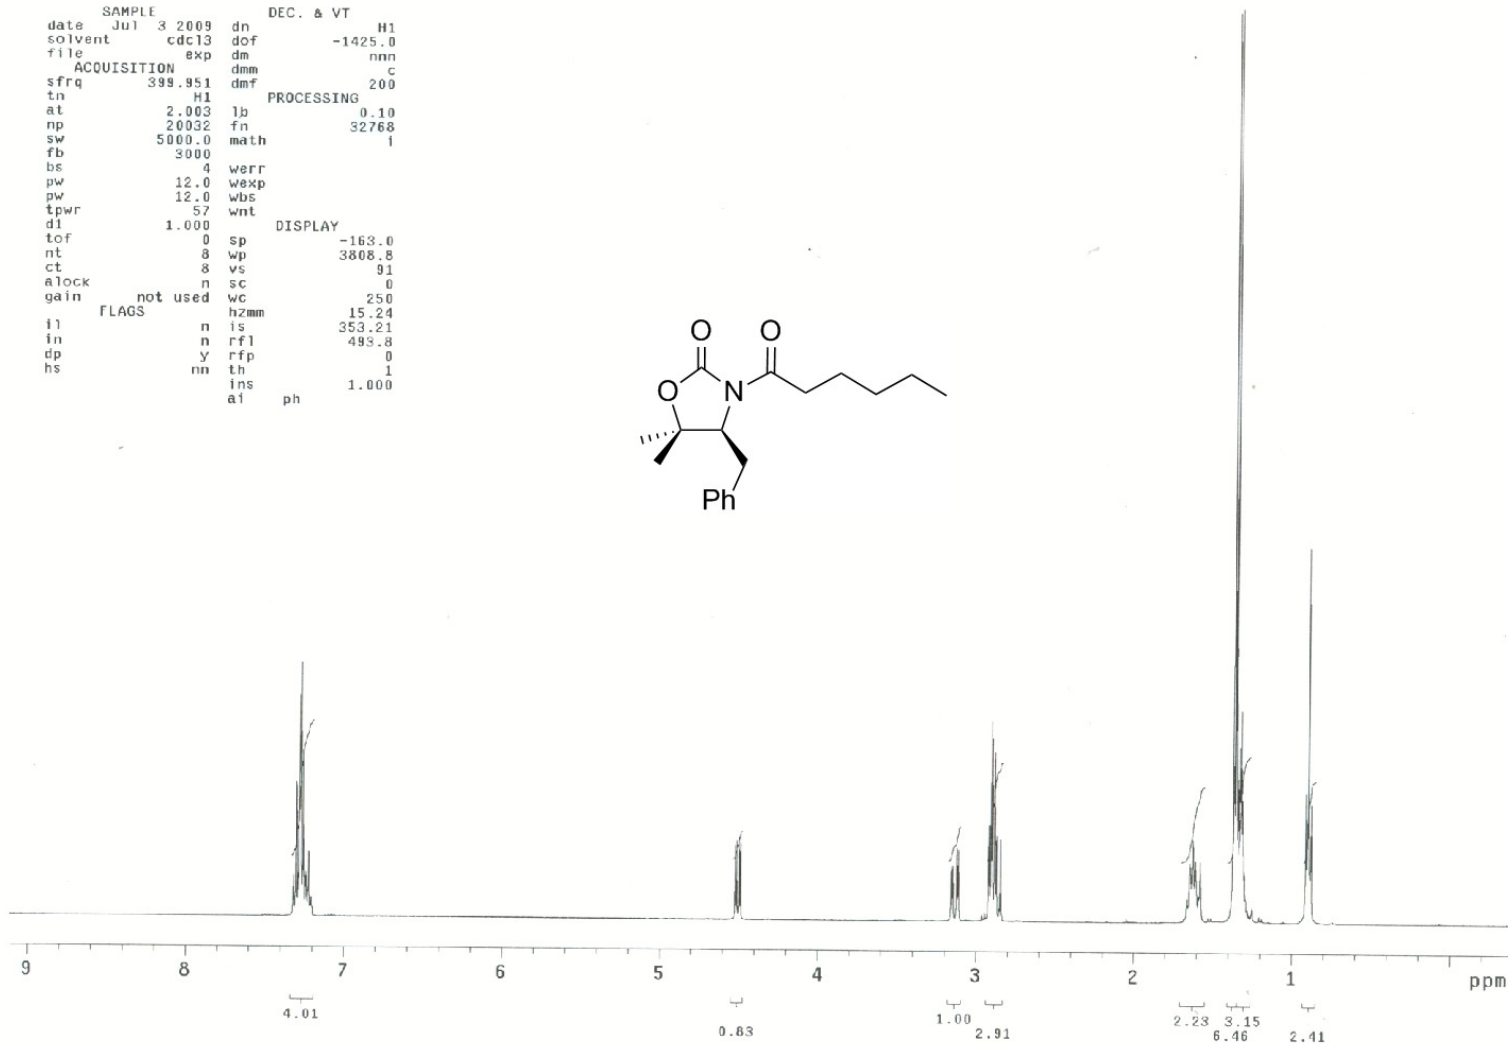

snb-1-232-a-13C

exp1 CARBON

| SAMPLE             |                | SPECIAL    |          |
|--------------------|----------------|------------|----------|
| date               | Jul 6 2009     | temp       | 22.0     |
| solvent            | CDCl3          | gain       | 42       |
| file               | /home/Zakaria~ | spin       | 20       |
| n/beamont/snb-1-2~ |                | hst        | 0.008    |
| 32-a-13c.500.fid   |                | pw90       | 9.200    |
| ACQUISITION        | alpha          | alpha      | 10.000   |
| sw                 | 36003.6        | FLAGS      |          |
| at                 | 1.300          | il         | n        |
| np                 | 93644          | in         | n        |
| fb                 | 20000          | dp         | y        |
| bs                 | 4              | hs         | nn       |
| d1                 | 1.000          | PROCESSING |          |
| nt                 | 92             | lb         | 0.50     |
| ct                 | 92             | fn         | not used |
| TRANSMITTER        | C13            | DISPLAY    |          |
| tn                 | C13            | sp         | -493.2   |
| sfrq               | 125.702        | wp         | 26741.2  |
| tof                | 865.4          | rfl        | 14905.5  |
| tpwr               | 56             | rfp        | 9707.0   |
| pw                 | 9.200          | rp         | 6.0      |
| DECOUPLER          | H1             | lp         | -257.6   |
| dn                 | H1             | PLOT       |          |
| dof                | 0              | wc         | 250      |
| dm                 | nyy            | sc         | 0        |
| decwave            |                | vs         | 6124     |
| dpwr               | 35             | th         | 9        |
| dmf                | 10104          | ai         | cdc ph   |

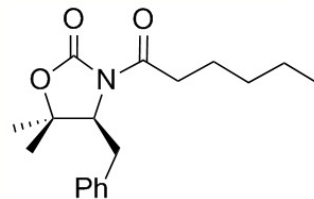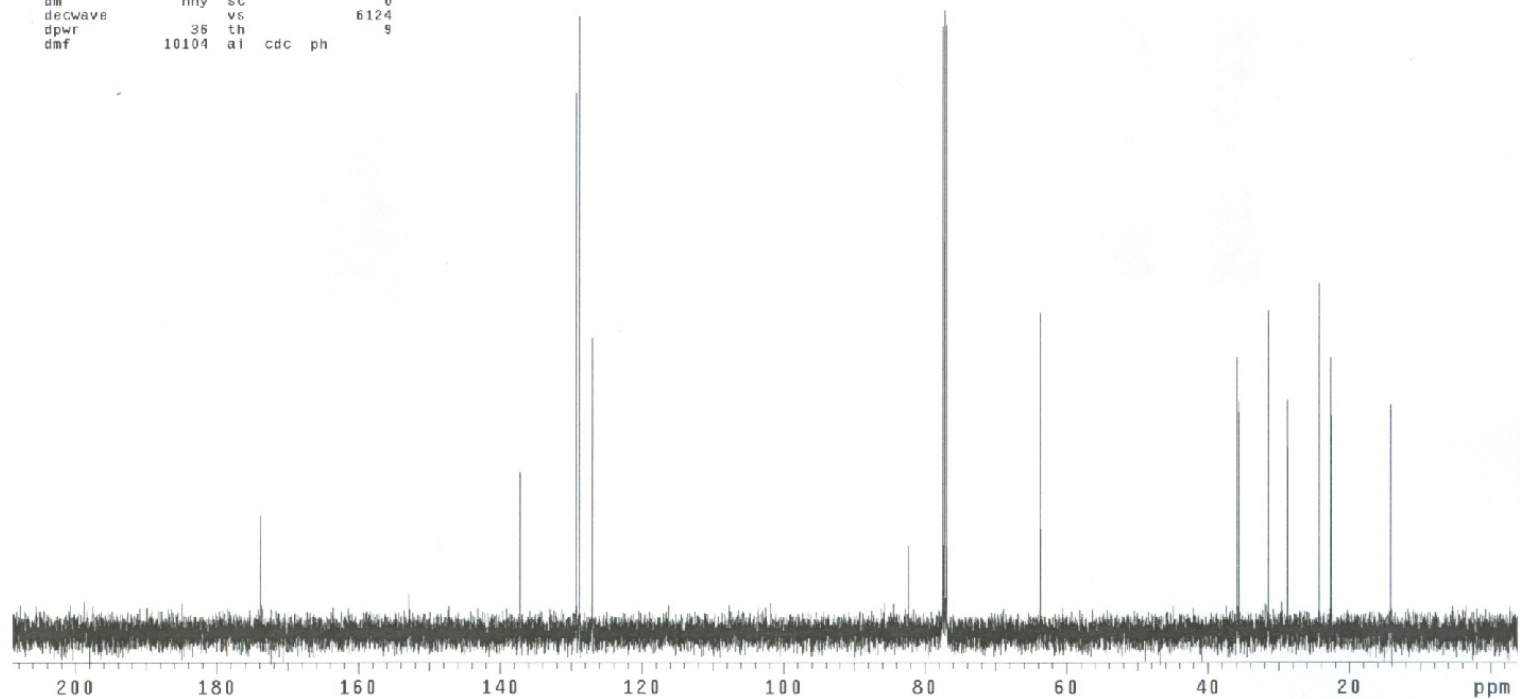



snb-1-264-a

exp1 s2pu1

|             |             |            |        |
|-------------|-------------|------------|--------|
| SAMPLE      |             | DEC. & VT  |        |
| date        | Jul 13 2009 | dn         | F19    |
| solvent     | cdcl3       | dof        | 0      |
| file        | exp         | dm         | nnn    |
| ACQUISITION |             | dmm        | c      |
| sfrq        | 499.859     | dmf        | 200    |
| tn          | H1          | PROCESSING |        |
| at          | 2.668       | fn         | 32768  |
| np          | 32000       | math       | i      |
| sw          | 5997.0      |            |        |
| fb          | 3000        | werr       |        |
| bs          | 4           | wexp       | wft    |
| pw          | 7.0         | wbs        |        |
| pw          | 7.0         | wnt        |        |
| tpwr        | 53          | DISPLAY    |        |
| d1          | 1.000       | sp         | -90.6  |
| tof         | 0           | wp         | 4404.4 |
| nt          | 16          | vc         | 101    |
| ct          | 16          | sc         | 0      |
| alock       | n           | wc         | 250    |
| gain        | not used    | hzmm       | 17.62  |
| FLAGS       |             | is         | 521.46 |
| il          | n           | rfl        | 4131.4 |
| in          | n           | rfp        | 3629.0 |
| dp          | y           | th         | 4      |
| hs          | nn          | ins        | 1.000  |
|             | ai          | ph         |        |

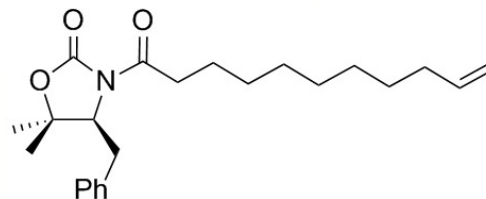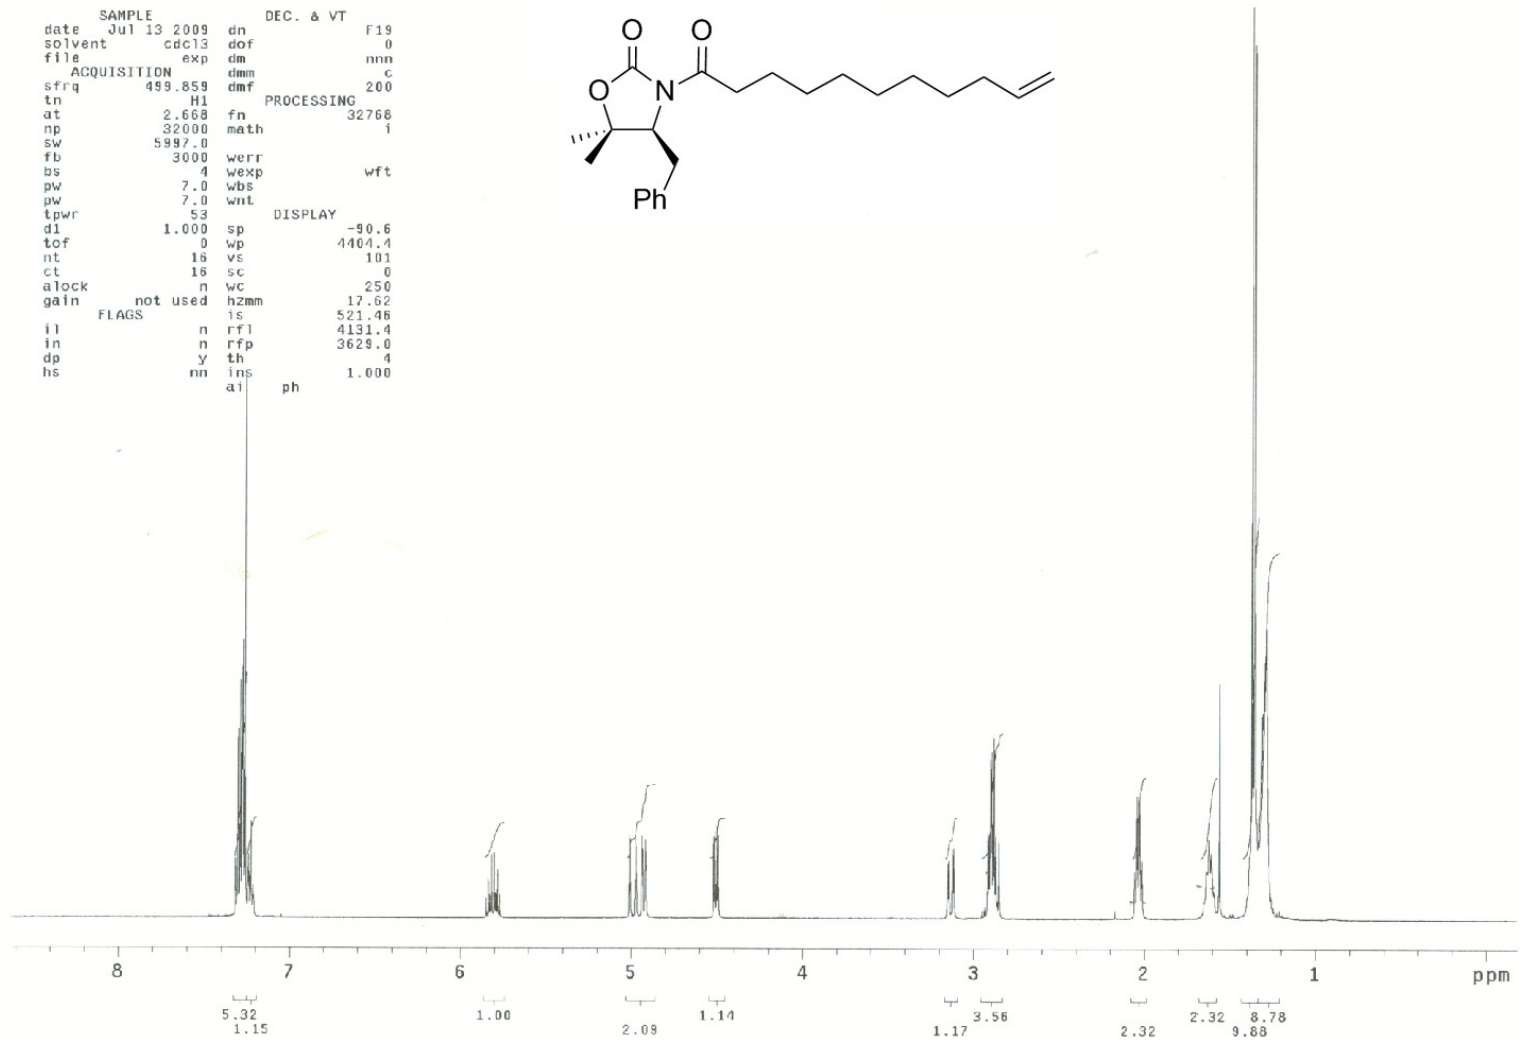

snb-1-252-a-13c

exp1 CARBON

| SAMPLE              |                | SPECIAL    |          |
|---------------------|----------------|------------|----------|
| date                | Jul 14 2009    | temp       | 22.0     |
| solvent             | CDCl3          | gain       | 42       |
| file                | /home/zakaria- | spin       | 20       |
| n/beaumont/snb-1-2- |                | hst        | 0.008    |
| 64-a-13c.500.fid    |                | pw90       | 9.200    |
| ACQUISITION         |                | alfa       | 10.000   |
| sw                  | 36003.6        | FLAGS      |          |
| at                  | 1.300          | il         | n        |
| np                  | 93644          | in         | n        |
| fb                  | 20000          | dp         | y        |
| bs                  | 4              | hs         | nn       |
| d1                  | 1.000          | PROCESSING |          |
| nt                  | 192            | lb         | 0.50     |
| ct                  | 192            | fn         | not used |
| TRANSMITTER         |                | DISPLAY    |          |
| tn                  | C13            | sp         | -194.9   |
| sfrq                | 125.702        | wp         | 25877.6  |
| tof                 | 865.4          | rfl        | 14905.0  |
| tpwr                | 56             | rfp        | 9707.0   |
| pw                  | 9.200          | rp         | -33.9    |
| DECOUPLER           |                | lp         | -306.7   |
| dn                  | H1             | PLOT       |          |
| dof                 | 0              | wc         | 250      |
| dm                  | nnn            | sc         | 0        |
| decwave             |                | vs         | 7885     |
| dpwr                | 36             | th         | 9        |
| dml                 | 10104          | ai         | cdc ph   |

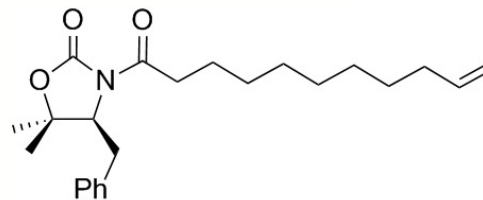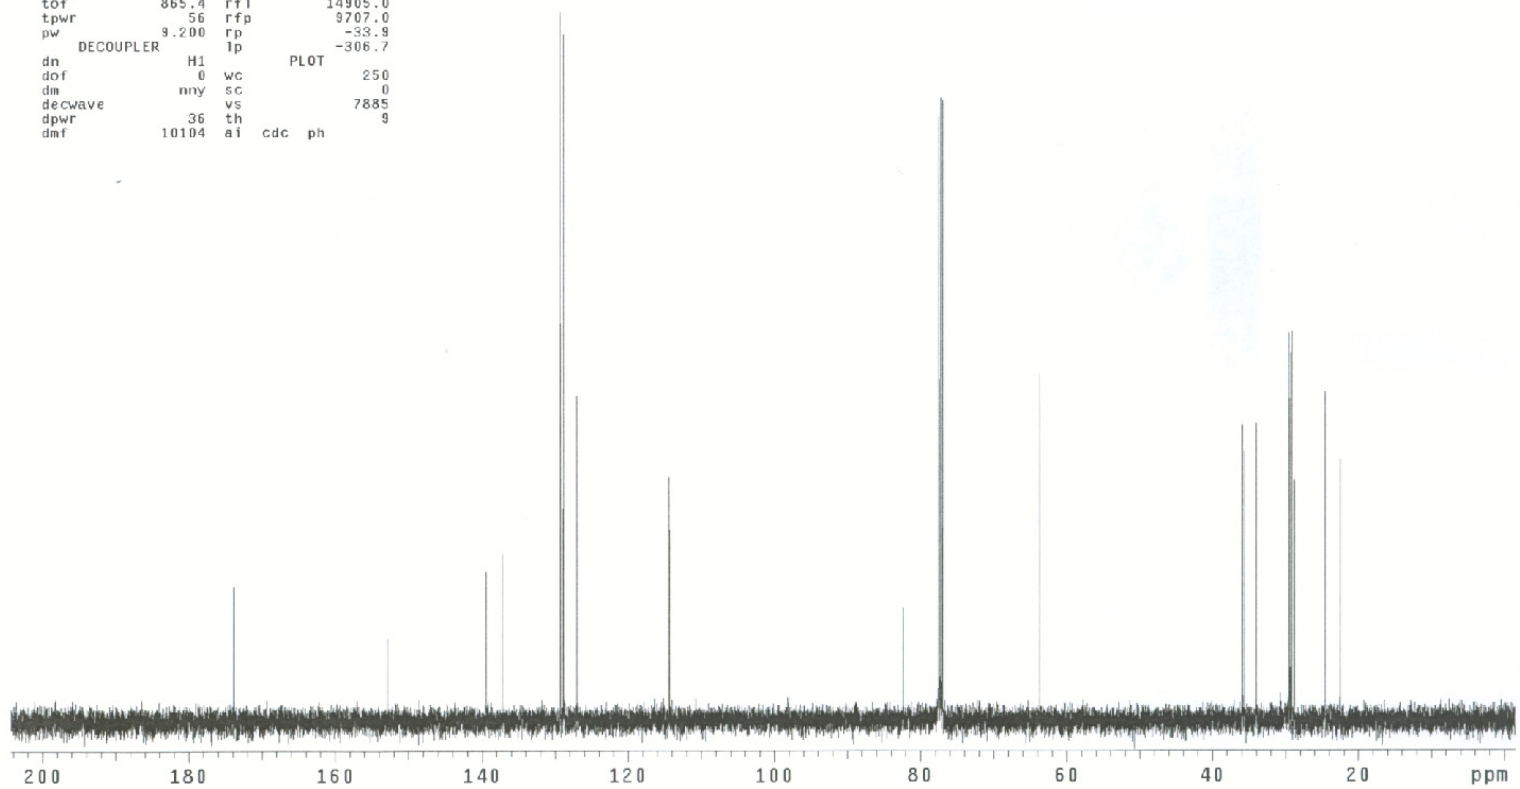

snb-1-287-a  
exp1 s2pu1

| SAMPLE      |             | DEC. & VT  |         |
|-------------|-------------|------------|---------|
| date        | Jul 29 2009 | dn         | H1      |
| solvent     | cdc13       | dof        | -1425.0 |
| file        | exp         | dmm        | nnn     |
| ACQUISITION |             | dmm        | c       |
| sfrq        | 399.951     | dmf        | 200     |
| tn          | H1          | PROCESSING |         |
| at          | 2.003       | lb         | 0.10    |
| np          | 20032       | fn         | 32768   |
| sw          | 5000.0      | math       | i       |
| fb          | 3000        | DISPLAY    |         |
| bs          | 4           | werr       | -38.4   |
| pw          | 12.0        | wexp       | 3779.8  |
| pw          | 12.0        | wbs        | 96      |
| tpwr        | 57          | wnt        | 0       |
| d1          | 4.000       | wc         | 250     |
| tof         | 0           | hzmm       | 15.12   |
| nt          | 8           | is         | 201.48  |
| ct          | 8           | rfl        | 3396.8  |
| alock       | n           | rfl        | 2903.6  |
| gain        | not used    | th         | 3       |
| FLAGS       |             | ins        | 1.000   |
| il          | n           | ai         | ph      |
| in          | n           |            |         |
| dp          | y           |            |         |
| hs          | nn          |            |         |

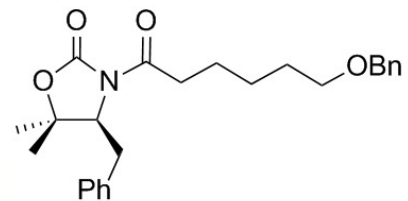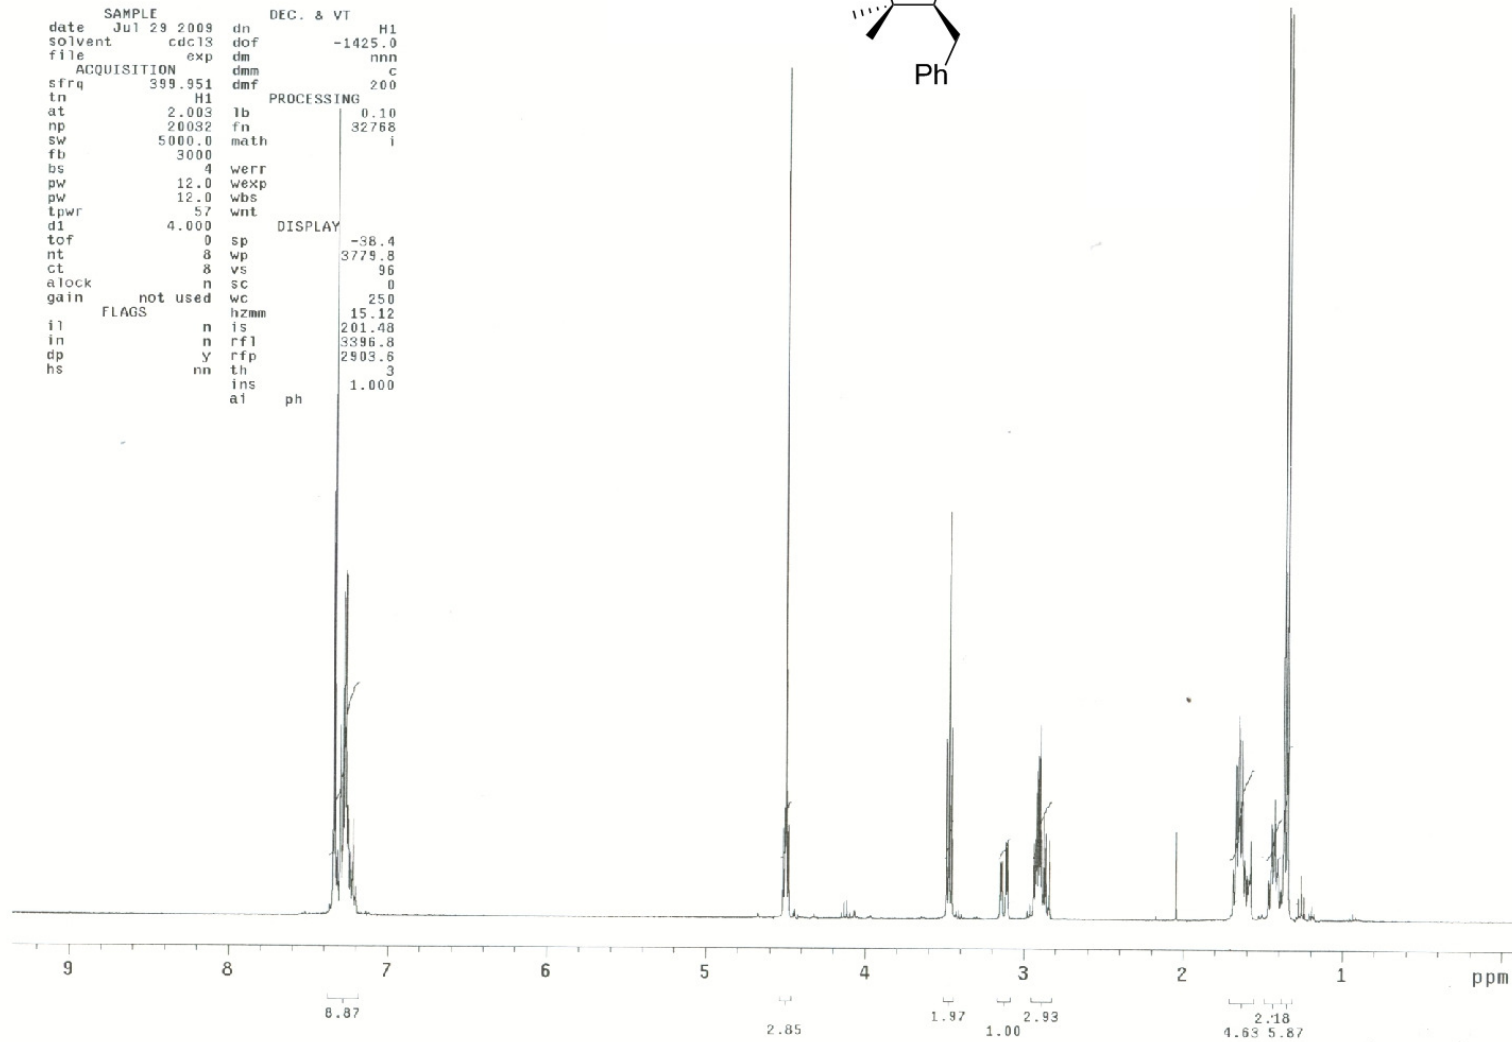

snb-1-287-a-13C

exp1 CARBON

| SAMPLE              |                | SPECIAL    |          |
|---------------------|----------------|------------|----------|
| date                | Aug 3 2009     | temp       | 22.0     |
| solvent             | CDC13          | gain       | 42       |
| file                | /home/Zakaria~ | spin       | 20       |
| n/beaumont/snb-1-2~ |                | hst        | 0.008    |
| 87-a-13C.500.fid    |                | pw90       | 9.200    |
| ACQUISITION         |                | alfa       | 10.000   |
| sw                  | 36003.6        | FLAGS      |          |
| at                  | 1.300          | il         | n        |
| np                  | 93644          | in         | n        |
| fb                  | 20000          | dp         | y        |
| bs                  | 4              | hs         | nn       |
| d1                  | 1.000          | PROCESSING |          |
| nt                  | 400            | lb         | 0.50     |
| ct                  | 180            | fn         | not used |
| TRANSMITTER         | C13            | DISPLAY    |          |
| tn                  |                | sp         | -643.2   |
| sfrq                | 125.702        | wp         | 25996.8  |
| tof                 | 865.4          | rfl        | 14906.6  |
| tpwr                | 56             | rfp        | 9707.0   |
| pw                  | 9.200          | rp         | -56.7    |
| DECOUPLER           |                | lp         | -250.1   |
| dn                  | H1             | PLOT       |          |
| dof                 | 0              | wc         | 250      |
| dm                  | nnn            | sc         | 0        |
| decwave             |                | vs         | 8436     |
| dpwr                | 36             | th         | 9        |
| dmf                 | 10104          | ai         | cdc ph   |

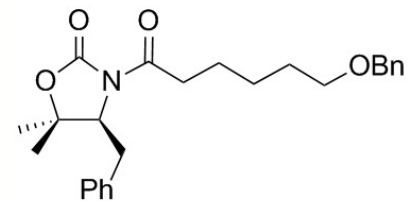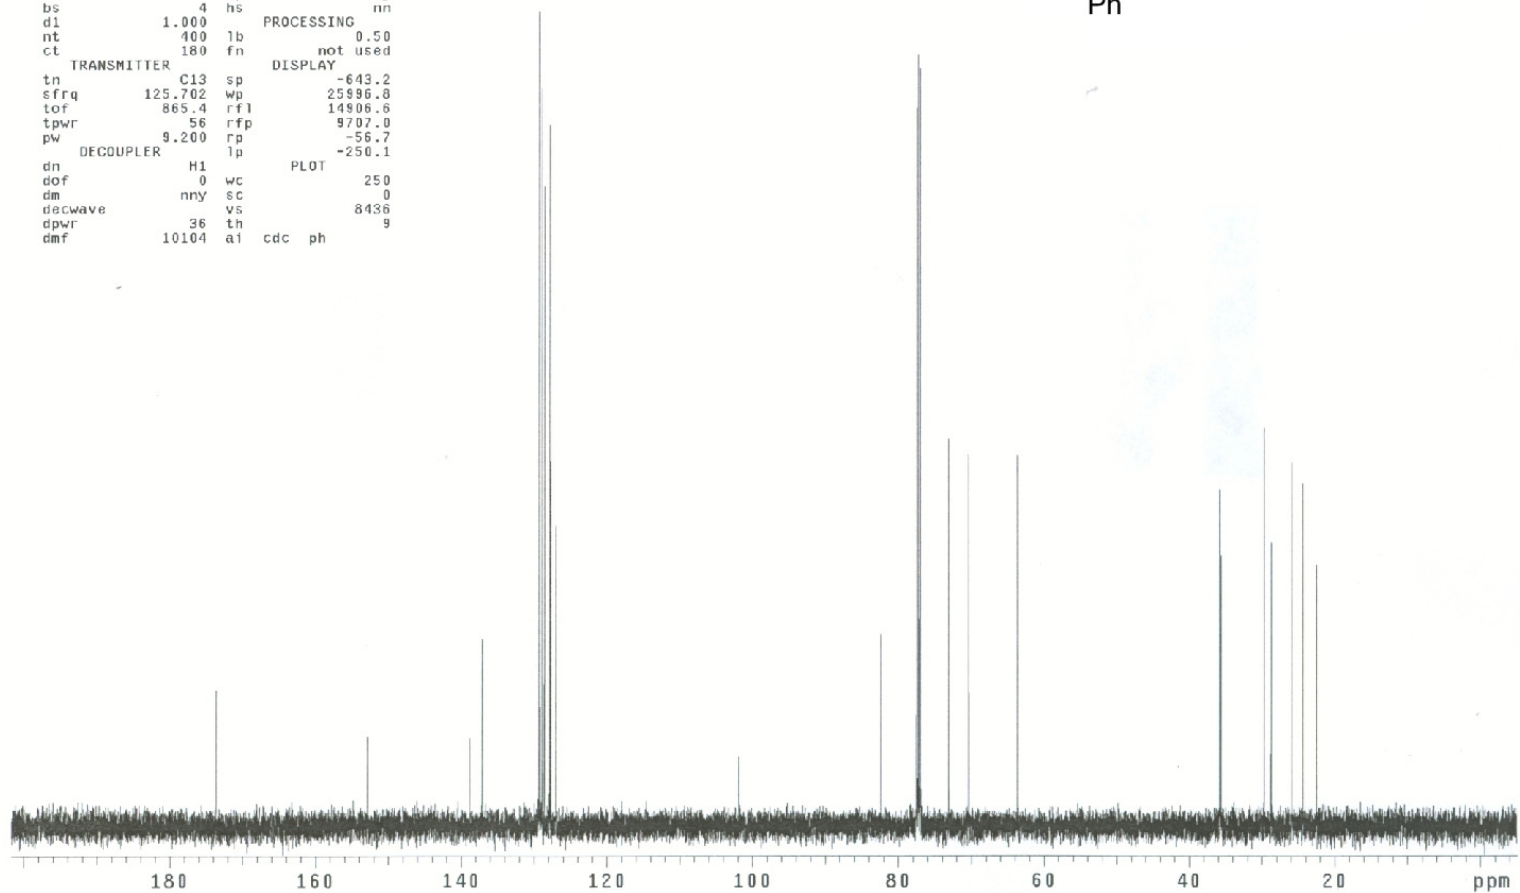

```

snb-1-248-a
exp1 s2pu1
SAMPLE
date Jul 3 2009 dn H1
solvent cdc13 dof -1425.0
file exp dm nnn
ACQUISITION dmm c
sfrq 399.951 dmf 200
tn H1 PROCESSING
at 2.003 lb 0.10
np 20032 fn 32768
sw 5000.0 math i
fb 3000
bs 4 werr
pw 12.0 wexp
pw 12.0 wbs
tpwr 57 wnt
d1 1.000 DISPLAY
tof 0 sp -41.8
nt 8 wp 3556.4
ct 8 vs 71
alock n sc 0
gain not used wc 250
FLAGS hzmm 14.23
il n is 353.21
in n rfl 3396.2
dp y rfp 2903.6
hs mn th 1
ai ph 1.000

```

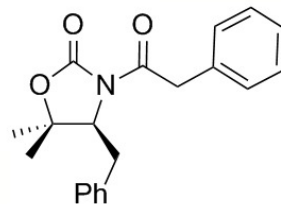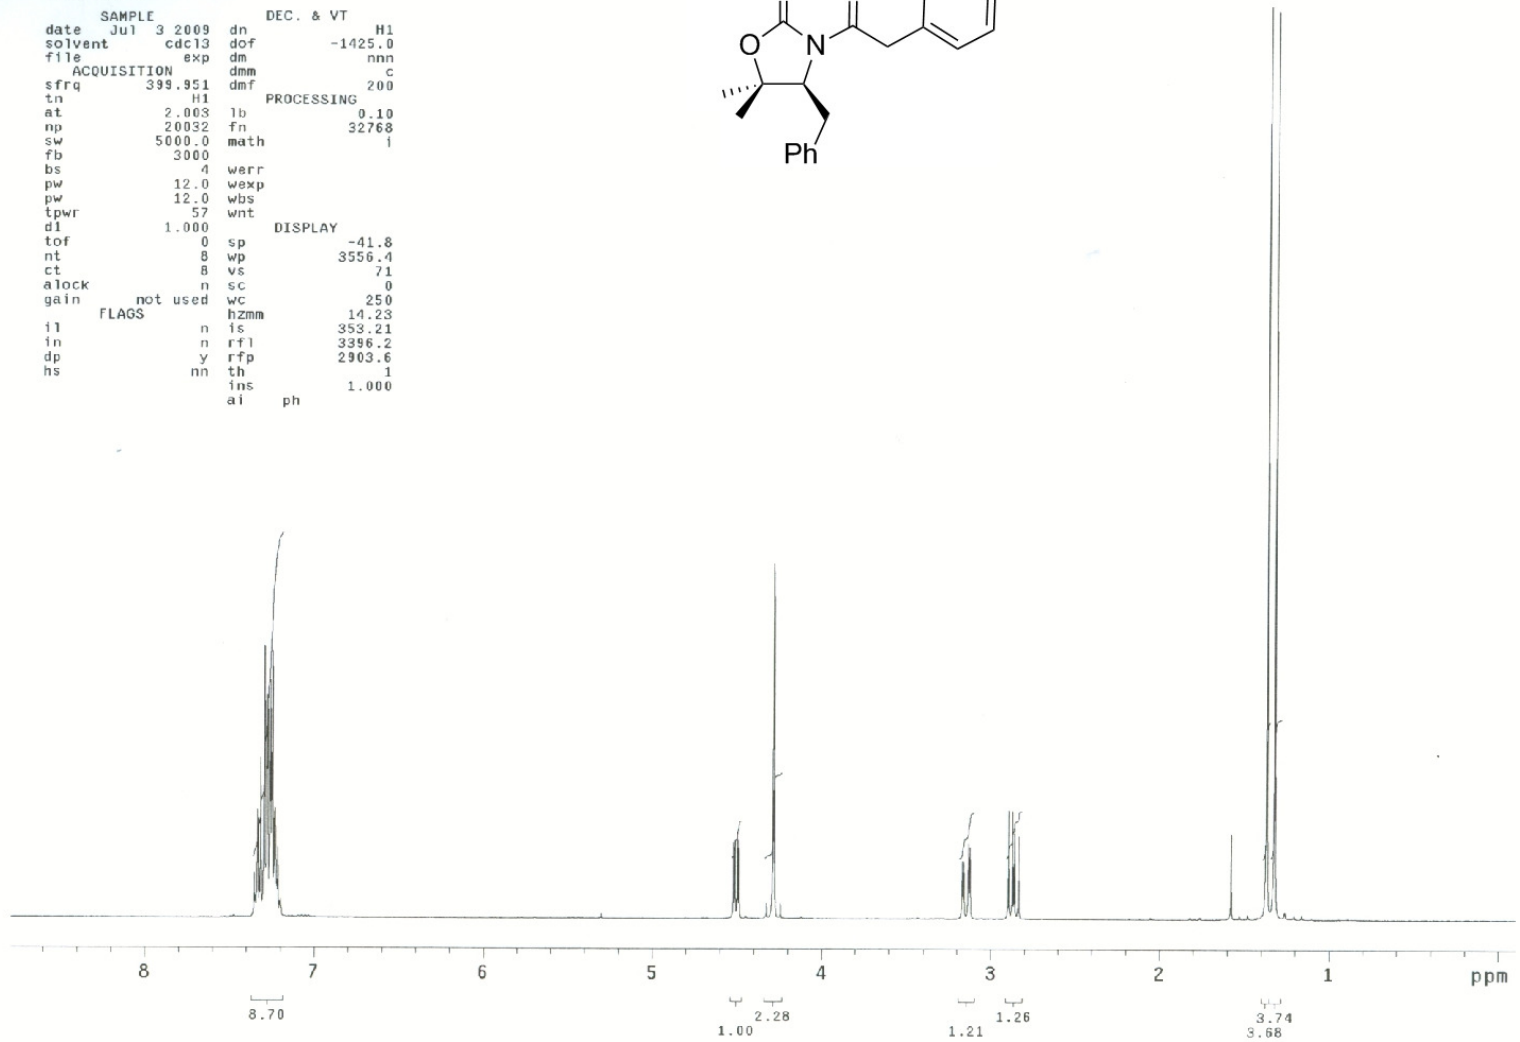

snb-1-249-a-13c

exp1 CARBON

| SAMPLE             |               | SPECIAL    |          |
|--------------------|---------------|------------|----------|
| date               | Jul 6 2009    | temp       | 22.0     |
| solvent            | CDC13         | gain       | 42       |
| file               | /home/Zakaria | spin       | 20       |
| n/beaumont/snb-1-2 |               | nst        | 0.008    |
| 49-a-13c.500.fid   |               | pw90       | 9.200    |
| ACQUISITION        |               | ALFA       |          |
| sw                 | 36003.6       | FLACS      | 10.000   |
| at                 | 1.300         | fl         | n        |
| np                 | 93644         | fn         | n        |
| fb                 | 20000         | dp         | y        |
| bs                 | 4             | hs         | nn       |
| dl                 | 1.000         | PROCESSING |          |
| nt                 | 92            | lb         | 0.50     |
| ct                 | 92            | fn         | not used |
| TRANSMITTER        |               | DISPLAY    |          |
| tn                 | C13           | sp         | -435.5   |
| sfrq               | 125.702       | wp         | 25728.7  |
| tof                | 865.4         | rfl        | 14907.2  |
| tpwr               | 56            | rfp        | 9707.0   |
| pw                 | 9.200         | rp         | 8.8      |
| DECOUPLER          |               | PL0T       |          |
| dn                 | H1            | wc         | 250      |
| dof                | 0             | sc         | 0        |
| dm                 | nyy           | vs         | 3972     |
| decwave            |               | th         | 7        |
| dpwr               | 36            | ai         | cdc ph   |
| dmf                | 10104         |            |          |

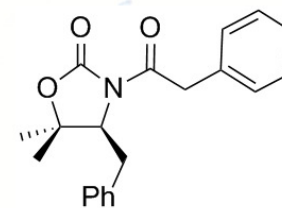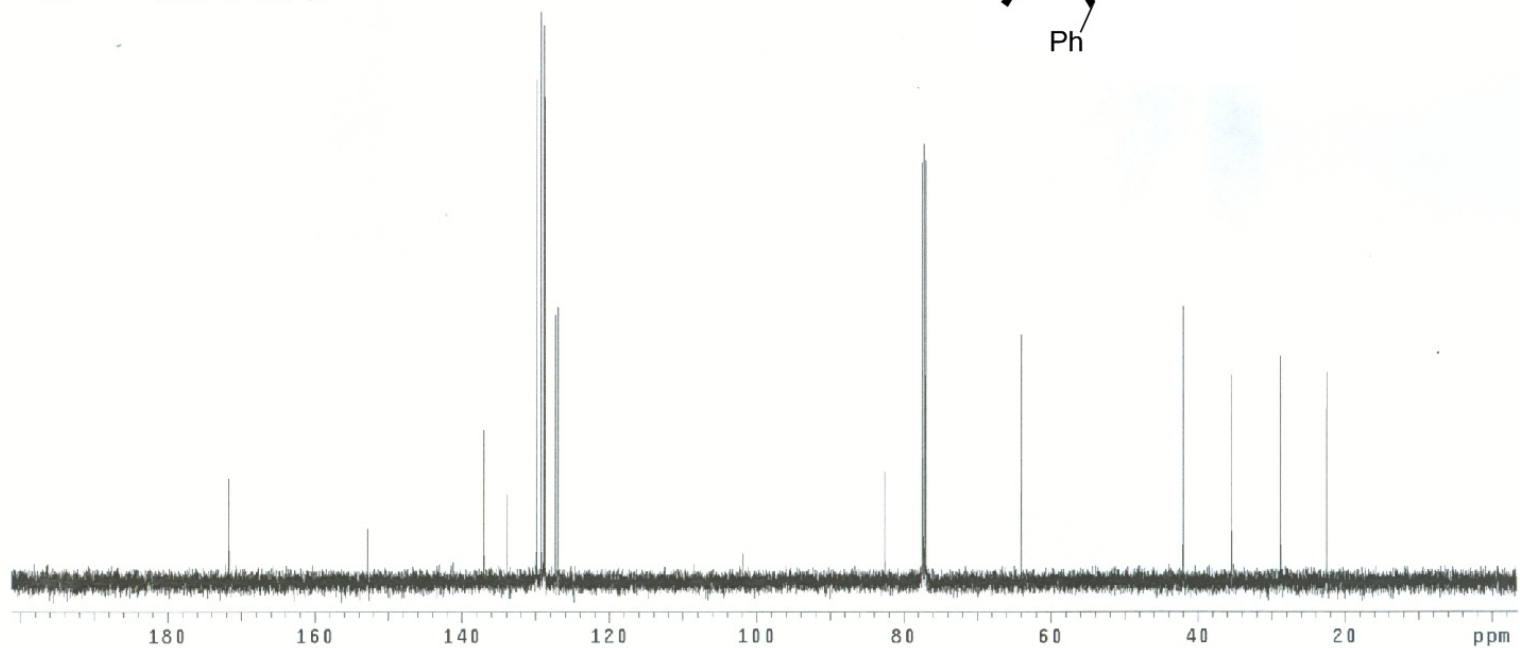

snb-1-297-a

exp1 s2pu1

|             |             |            |        |
|-------------|-------------|------------|--------|
| date        | Oct 30 2009 | dn         | F19    |
| solvent     | cdc13       | dof        | 0      |
| file        | exp         | dmm        | nnn    |
| ACQUISITION |             | dmm        | c      |
| sfrq        | 499.859     | dmf        | 200    |
| tn          | H1          | temp       | 22.0   |
| at          | 2.732       | PROCESSING |        |
| np          | 32768       | lb         | 0.20   |
| sw          | 5997.0      | fn         | 32768  |
| fb          | 3000        | math       | 1      |
| bs          | 4           |            |        |
| pw          | 10.0        | werr       |        |
| pw          | 10.0        | wexp       | wft    |
| tpwr        | 53          | wbs        |        |
| d1          | 4.000       | wnt        |        |
| tof         | 0           | DISPLAY    |        |
| nt          | 1           | sp         | -36.4  |
| ct          | 1           | wp         | 4230.6 |
| alock       | n           | vs         | 89     |
| gain        | not used    | sc         | 0      |
| FLAGS       |             | wc         | 250    |
| il          | n           | hzmm       | 16.92  |
| in          | n           | is         | 130.11 |
| dp          | y           | rfl        | 4131.7 |
| hs          | nn          | rffp       | 3629.0 |
|             |             | th         | 2      |
|             |             | ins        | 1.000  |
|             |             | at         | ph     |

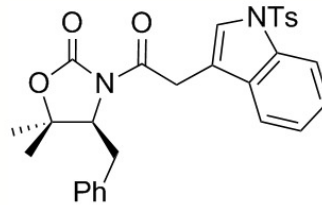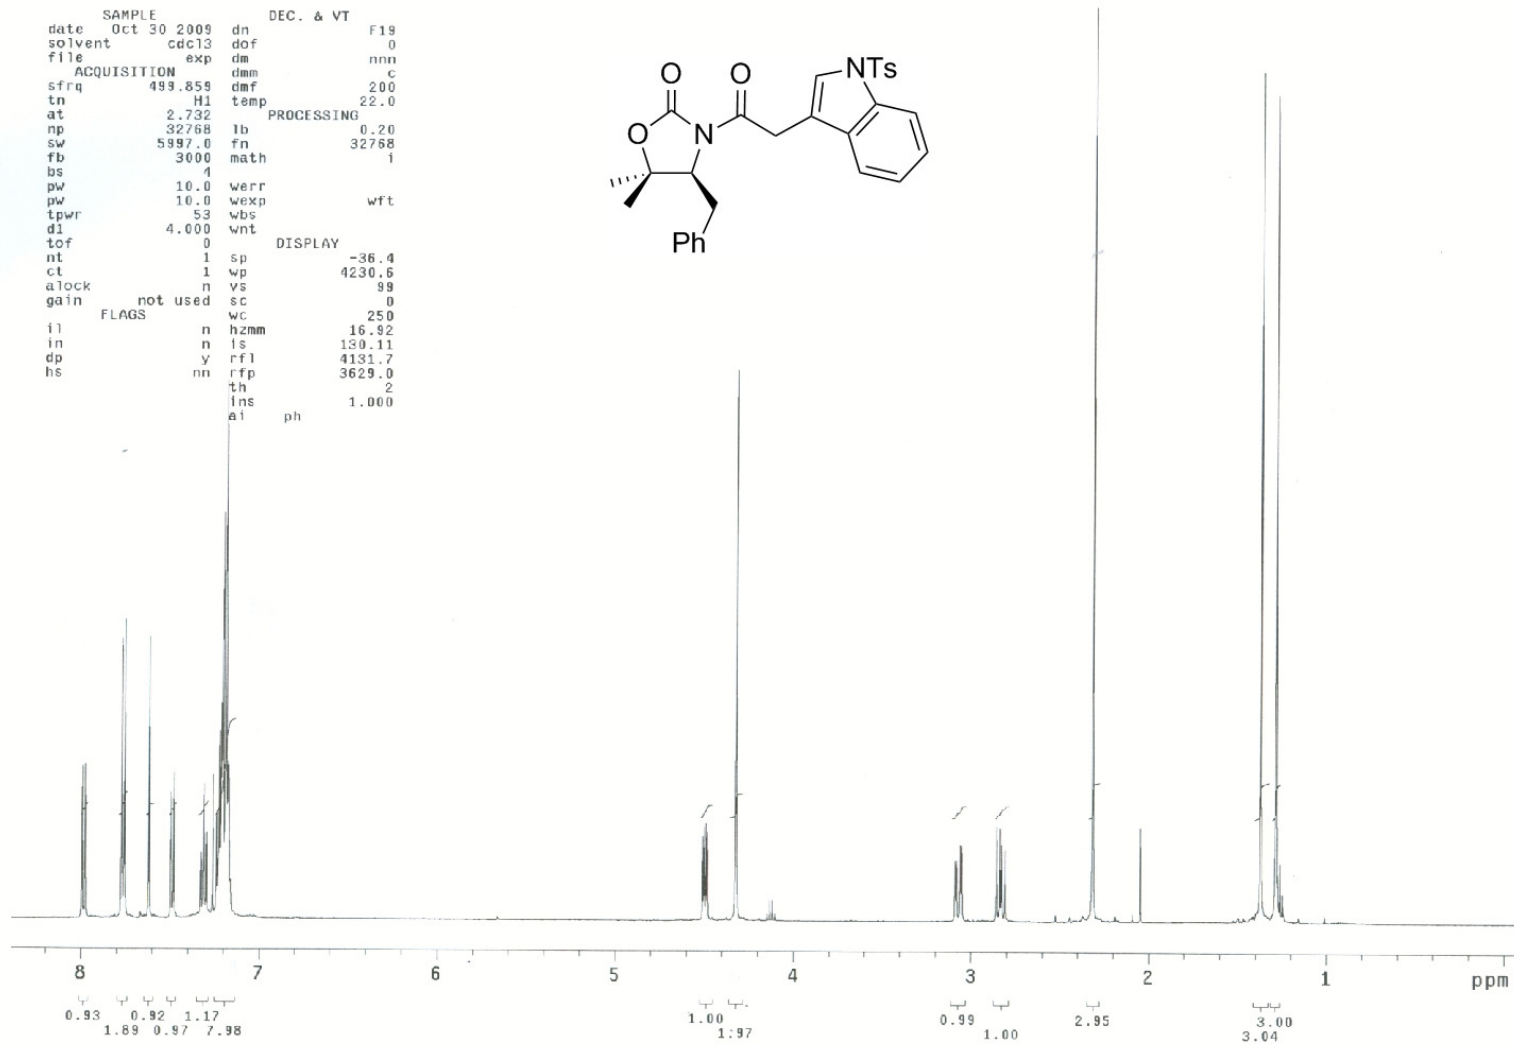

snb-1-297-a-13C

exp1 CARBON

| SAMPLE      |             | SPECIAL    |          |
|-------------|-------------|------------|----------|
| date        | Oct 30 2009 | temp       | 22.0     |
| solvent     | CDCl3       | gain       | 42       |
| file        | exp         | spin       | 20       |
| ACQUISITION |             | SPECIAL    |          |
| sw          | 36003.6     | hst        | 0.008    |
| at          | 1.300       | pw90       | 9.200    |
| np          | 93644       | alfa       | 10.000   |
| FLAGS       |             | PROCESSING |          |
| fb          | 20000       | il         | n        |
| bs          | 4           | in         | n        |
| d1          | 1.000       | dp         | y        |
| nt          | 512         | hs         | nn       |
| ct          | 84          | hs         | nn       |
| TRANSMITTER |             | PROCESSING |          |
| tn          | C13         | lb         | 0.50     |
| sfrq        | 125.702     | fn         | not used |
| tof         | 865.4       | sp         | -169.6   |
| tpwr        | 56          | wp         | 25987.1  |
| pw          | 9.200       | rfl        | 14909.4  |
| DECOUPLER   |             | PLLOT      |          |
| dn          | H1          | rpp        | 9707.0   |
| dof         | 0           | rp         | -47.5    |
| dm          | nny         | lp         | -253.6   |
| decwave     |             | wc         | 250      |
| dpwr        | 36          | sc         | 0        |
| dmf         | 10104       | vs         | 3258     |
|             |             | th         | 5        |
|             |             | ai         | cdc ph   |

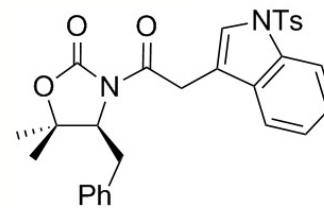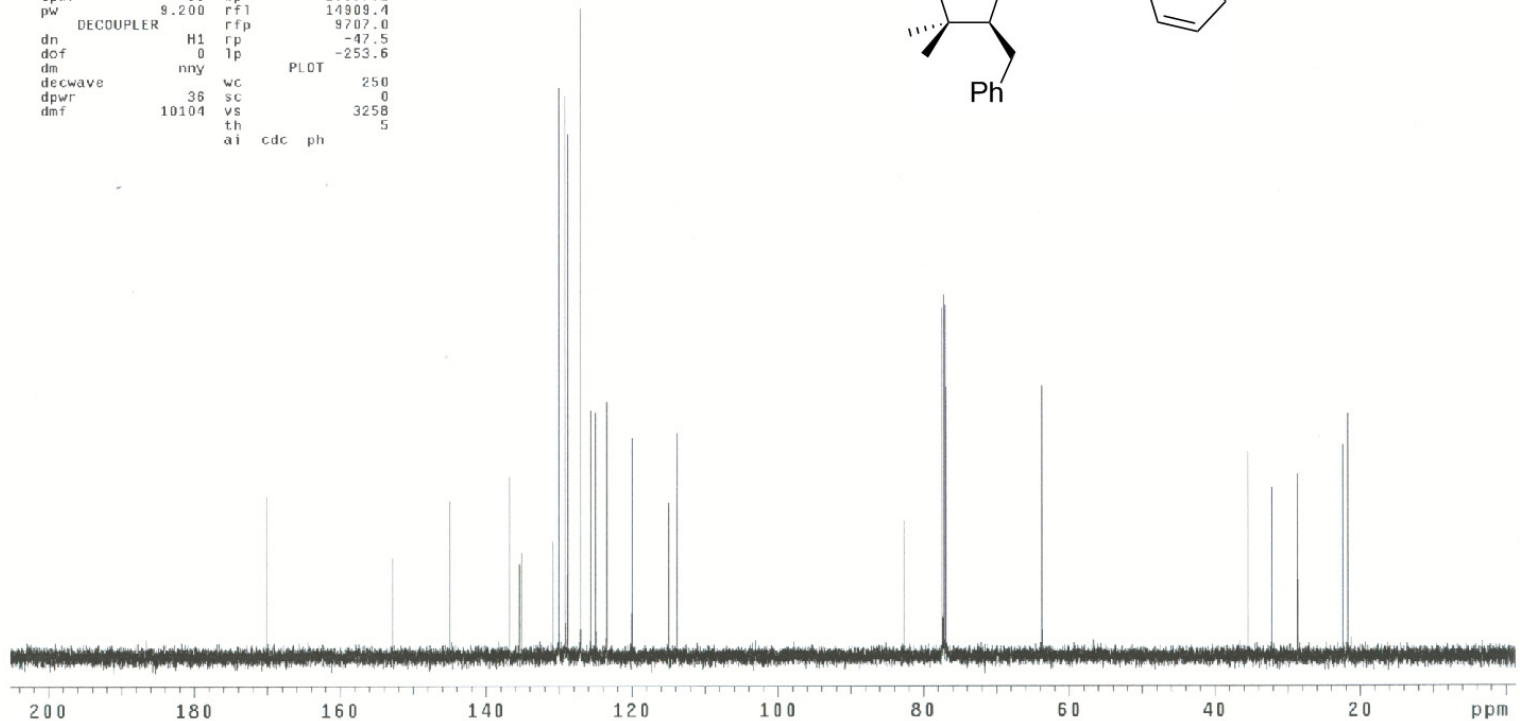



```

snb-1-157-a
exp1 s2pul
SAMPLE
date May 6 2008 dn DEC. & VT F19
solvent cdc13 dof 0
file exp dm nnn
ACQUISITION dmm c
sfrq 499.859 dmf 200
tn H1 temp 22.0
at 2.668 PROCESSING
np 32000 fn 32768
sw 5997.0 math i
fb 3000
bs 4 werr
pw 7.0 wexp wft
tpwr 7.0 wbs
d1 53 wnt
d1 2.000 DISPLAY
tof 0 sp -140.0
nt 8 wp 4210.8
ct 8 vs 105
alock n sc 0
gain not used wc 250
FLAGS hzmm 16.84
il n is 251.34
in n rfl 4148.0
dp y rfp 3629.0
hs mn th 45
ins 1.000
at cdc ph

```

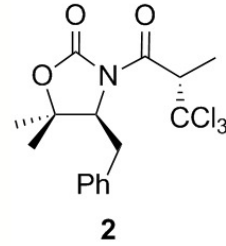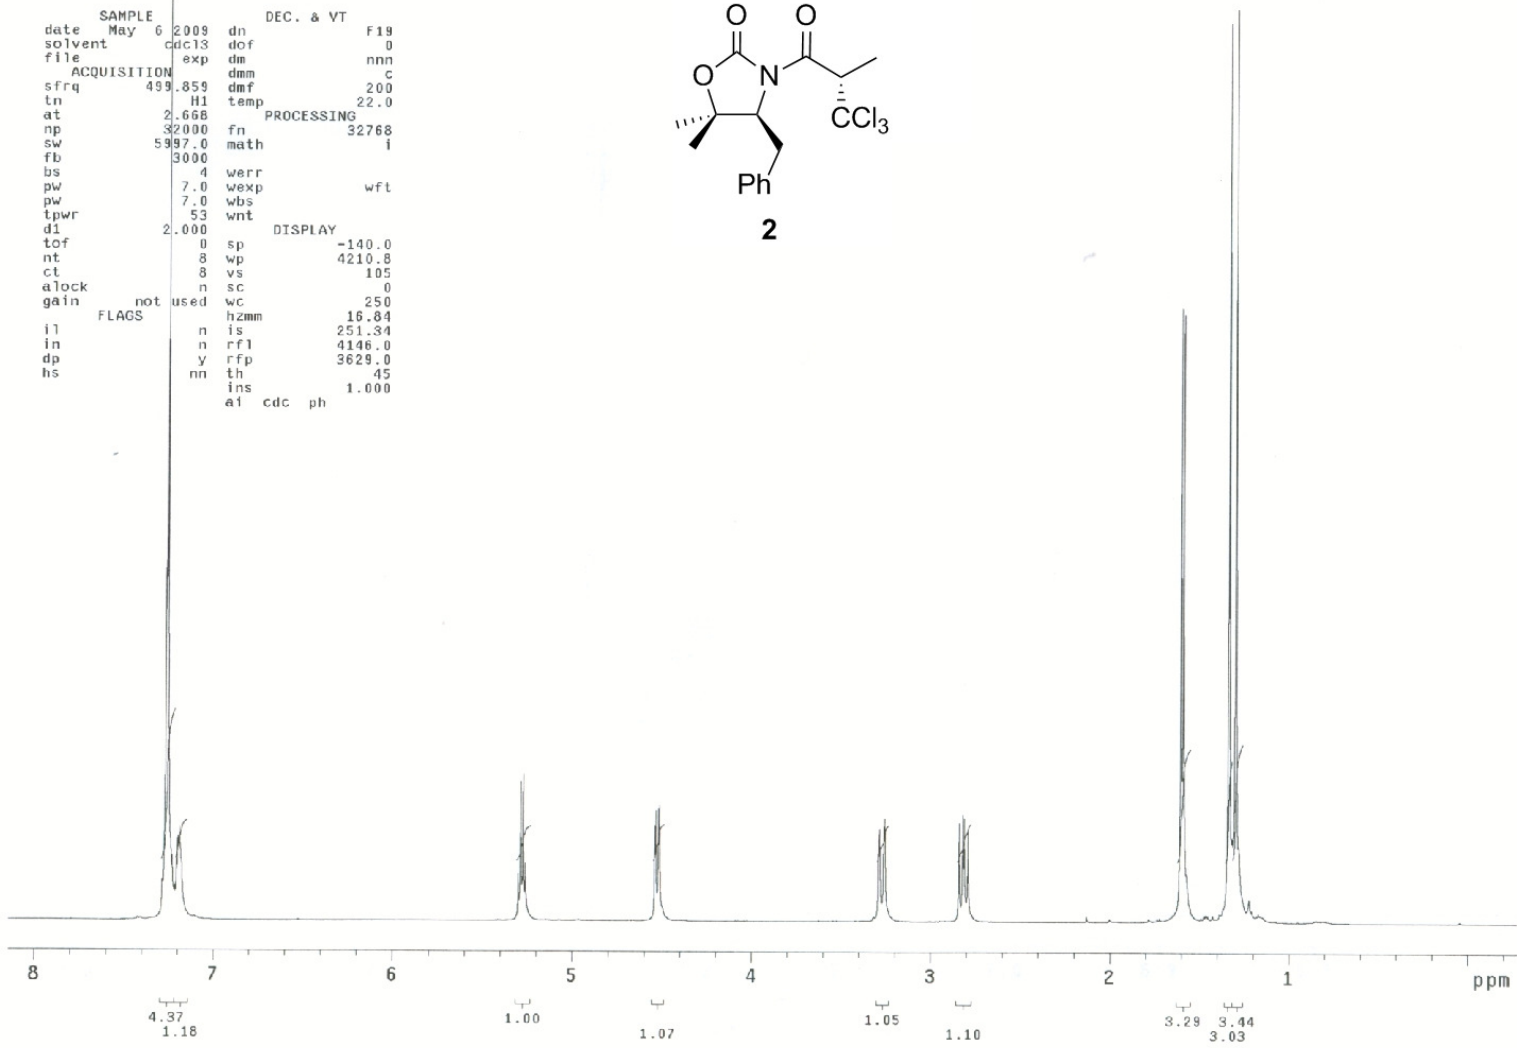

## STANDARD CARBON PARAMETERS

exp1 CARBON

| SAMPLE      |                | SPECIAL    |          |
|-------------|----------------|------------|----------|
| date        | Aug 19 2009    | temp       | not used |
| solvent     | CDCl3          | gain       | 42       |
| file        | /home/Zakaria~ | spin       | 20       |
| n/monroe    | /1rm-1-135~    | hst        | 0.008    |
|             | -c13.fid       | pw90       | 9.200    |
|             |                | alfa       | 10.000   |
| ACQUISITION |                | FLAGS      |          |
| sw          | 33999.2        |            |          |
| at          | 1.300          | i1         | n        |
| np          | 80430          | in         | n        |
| fb          | 19000          | dp         | y        |
| bs          | 4              | hs         | nn       |
| di          | 0.200          | PROCESSING |          |
| nt          | 100000         | lb         | 0.50     |
| ct          | 2600           | fn         | not used |
| TRANSMITTER |                | DISPLAY    |          |
| tn          | C13            | sp         | -206.5   |
| sfrq        | 125.702        | wp         | 25562.1  |
| tof         | 865.4          | rf1        | 13907.1  |
| tpwr        | 56             | rfp        | 9707.0   |
| pw          | 9.200          | rp         | -32.0    |
|             |                | lp         | -268.0   |
| DECOUPLER   |                | PLOT       |          |
| dn          | H1             | wc         | 250      |
| dof         | 0              | sc         | 0        |
| dm          | nnv            | vs         | 1687     |
| decwave     |                | th         | 6        |
| dpr         | 36             | di         | ph       |
| dmf         | 10104          |            |          |

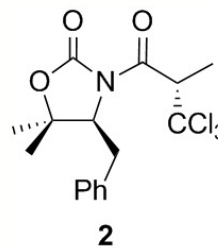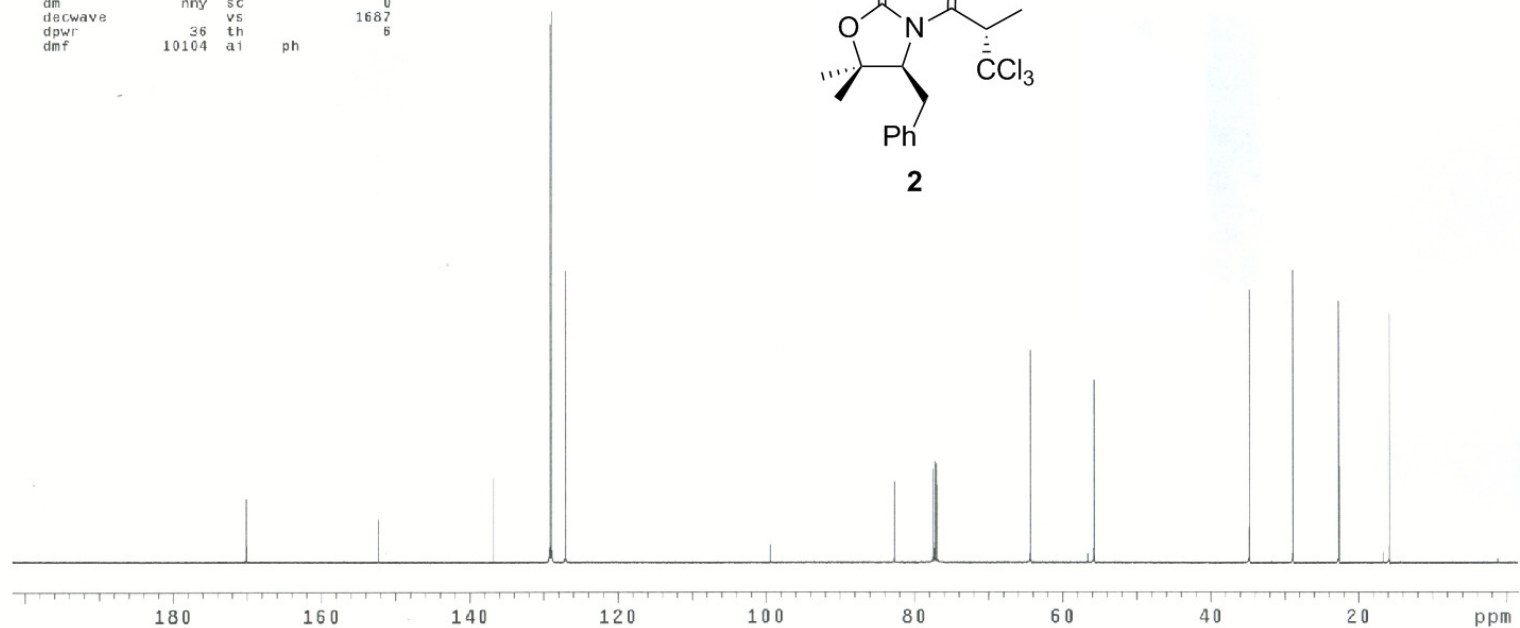

```

snb-1-236-a
exp1 s2pu1
SAMPLE          DEC. & VT
date Jul 1 2009 dn          F19
solvent cdc13 dof          0
file exp dm              nnn
ACQUISITION    dmm         C
sfrq 499.859 dmf         200
tn H1 PROCESSING
at 2.668 fn          32768
np 32000 math        1
sw 5997.0
fb 3000 werr
bs 4 wexp           wft
pw 7.0 wbs
pw 7.0 wnt
tpwr 53 DISPLAY
d1 1.000 sp          -71.2
tof 0 wp            4687.0
nt 8 vs            63
ct 8 sc            0
alock n wc         250
gain not used hzmm   18.75
FLAGS is          375.95
il n rfl          4131.7
in n rfp          3629.0
dp y th           2.4
hs mn ins        1.000
ai ph

```

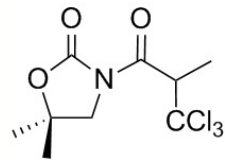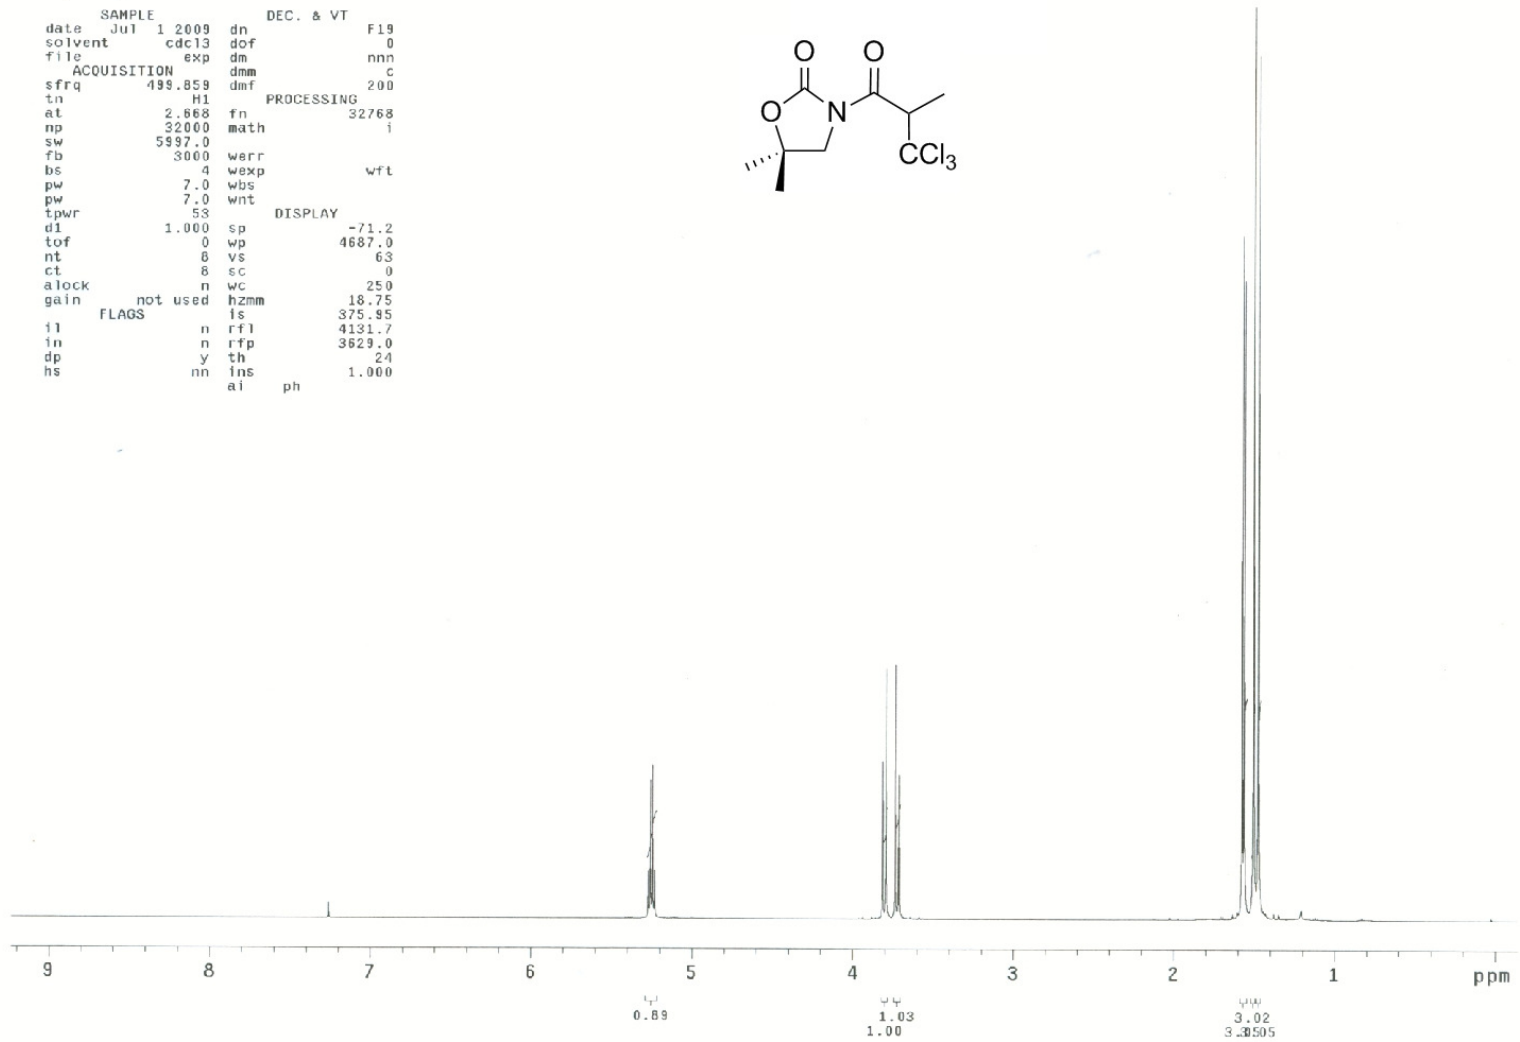

snb-1-226-a-c13

exp1 CARBON

| SAMPLE      |                | SPECIAL    |          |
|-------------|----------------|------------|----------|
| date        | Jun 29 2009    | temp       | 22.0     |
| solvent     | CDCl3          | gain       | 42       |
| file        | /home/Zakaria~ | spin       | 20       |
| n/beamont   | snb-1-2~       | hst        | 0.008    |
| 26-a-c13    | 500.fid        | pw90       | 9.200    |
| ACQUISITION |                | alfa       | 10.000   |
| sw          | 36003.6        | FLAGS      |          |
| at          | 1.300          | il         | n        |
| np          | 93644          | in         | n        |
| fb          | 20000          | dp         | y        |
| bs          | 4              | hs         | nn       |
| d1          | 1.000          | PROCESSING |          |
| nt          | 90             | lb         | 0.50     |
| ct          | 20             | fn         | not used |
| TRANSMITTER |                | DISPLAY    |          |
| tn          | C13            | sp         | -348.0   |
| sfrq        | 125.702        | wp         | 25758.9  |
| tof         | 865.4          | rfl        | 14938.9  |
| tpwr        | 56             | rfp        | 9707.0   |
| pw          | 9.200          | rp         | -61.9    |
| DECOUPLER   |                | lp         | -274.1   |
| dn          | H1             | PLOT       |          |
| dof         | 0              | wc         | 250      |
| dm          | nny            | sc         | 0        |
| dscwave     |                | vs         | 304      |
| dpwr        | 36             | th         | 9        |
| dmf         | 10104          | ai         | cdc ph   |

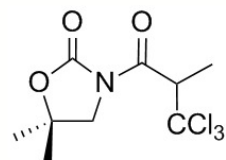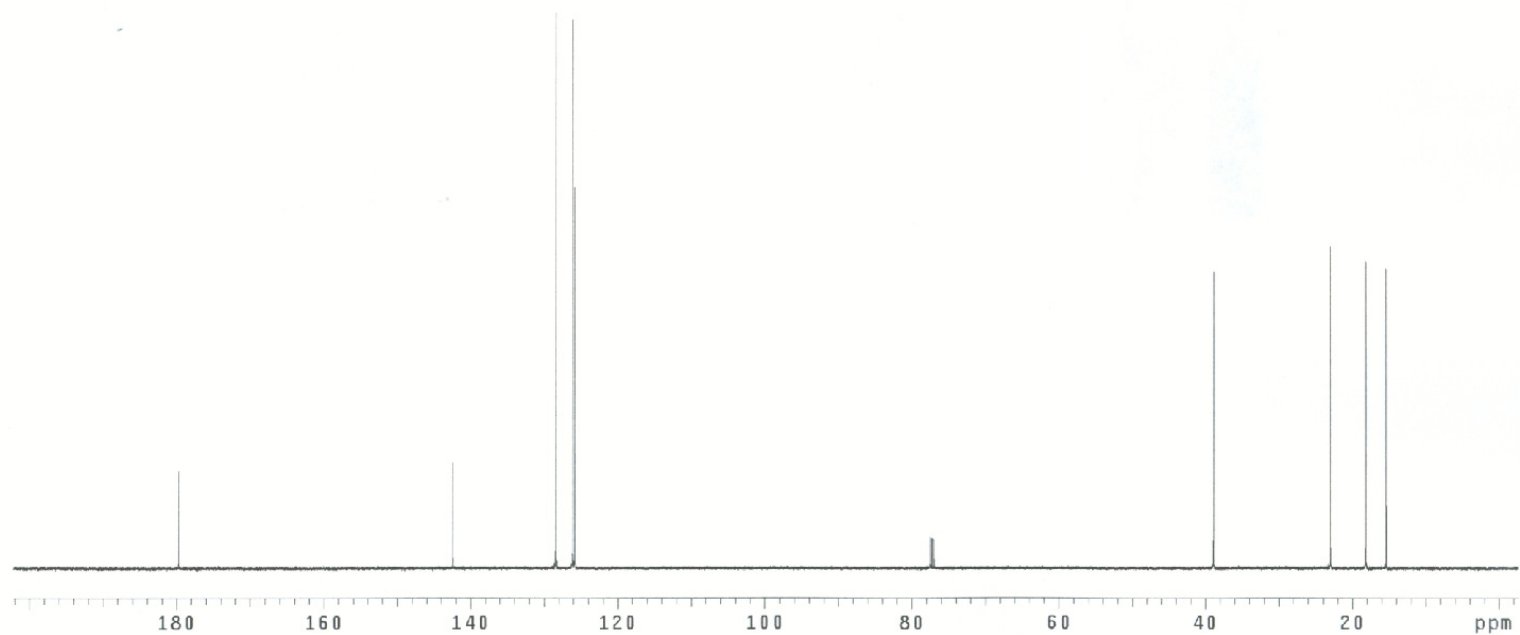

snb-1-251-a

expl s2pu1

| SAMPLE      |             | DEC. & VT  |        |
|-------------|-------------|------------|--------|
| date        | Jul 15 2009 | dn         | F19    |
| solvent     | cdcl3       | dof        | 0      |
| file        | exp         | dm         | nnn    |
| ACQUISITION |             | PROCESSING |        |
| sfrq        | 499.859     | dmm        | c      |
| tn          | H1          | dmf        | 200    |
| at          | 2.668       | fn         | 32768  |
| np          | 32000       | math       | 1      |
| sw          | 5897.0      |            |        |
| fb          | 3000        | werr       |        |
| bs          | 4           | wexp       | wft    |
| pw          | 7.0         | wbs        |        |
| pw          | 7.0         | wnt        |        |
| tpwr        | 53          | DISPLAY    |        |
| d1          | 1.000       | sp         | -215.1 |
| tof         | 0           | wp         | 4642.3 |
| nt          | 8           | vs         | 63     |
| ct          | 8           | sc         | 0      |
| alock       | n           | wc         | 250    |
| gain        | not used    | hzmm       | 18.57  |
| FLAGS       |             | is         | 188.76 |
| il          | n           | rfl        | 4131.7 |
| in          | n           | rfp        | 3629.0 |
| dp          | y           | th         | 4      |
| hs          | nn          | ins        | 1.000  |
|             |             | ai         | ph     |

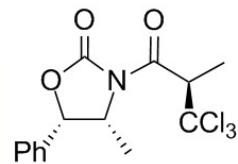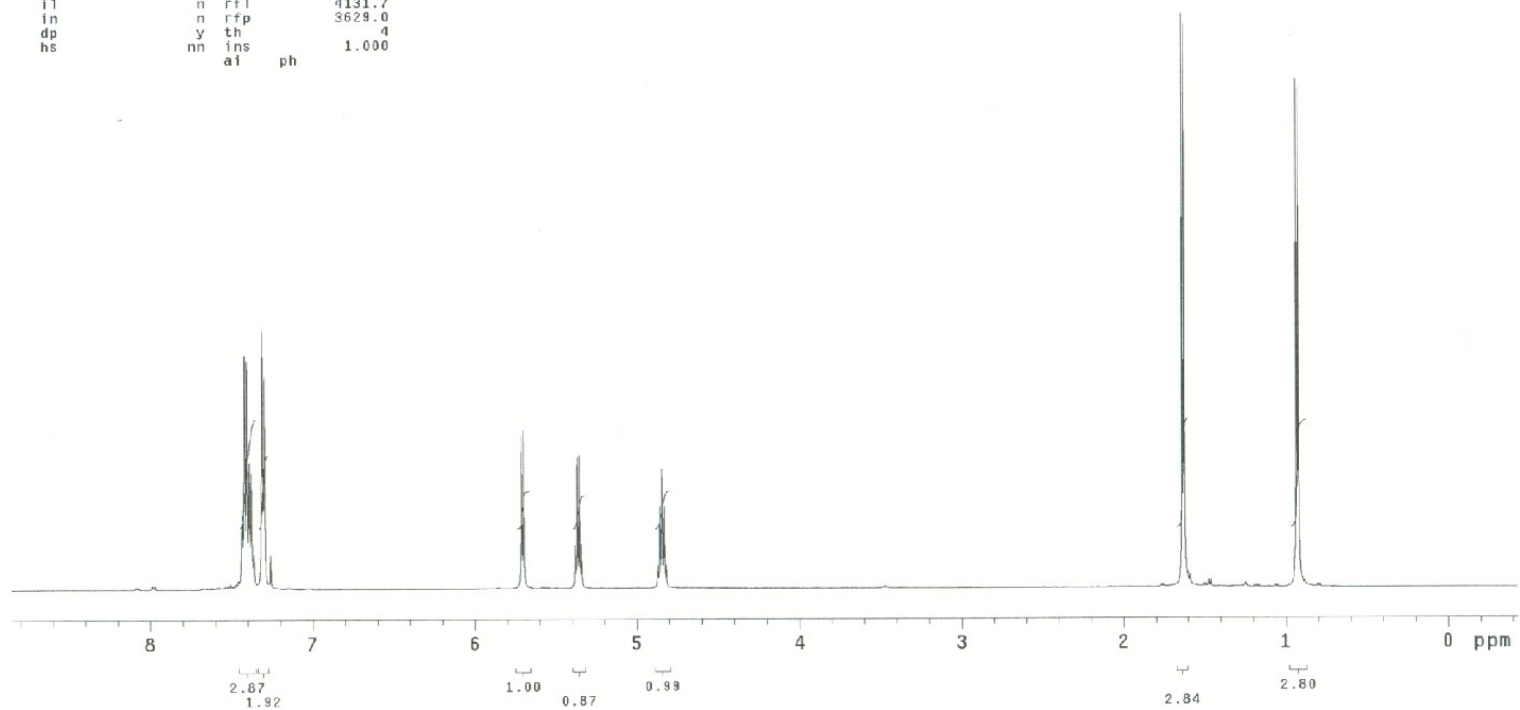

```

snb-1-25-a-13c
exp1 CARBON
SAMPLE SPECIAL
date Jul 15 2009 temp 22.0
solvent CDCl3 gain 42
file /home/Zakaria~ spin 20
n/beaumont/snb-1-2~ hst 0.008
51-a-13c.500.fid pw90 9.200
ACQUISITION a1fa 10.000
sw 36003.6 FLAGS
at 1.300 il n
np 93644 in n
fb 20000 dp y
bs 4 hs nn
d1 1.000 PROCESSING
nt 92 lb 0.50
ct 32 fn not used
TRANSMITTER C13 DISPLAY
tn C13 sp -521.2
sfrq 125.702 wp 25877.6
tof 865.4 rfl 14914.3
tpwr 56 rfp 9707.0
pw 9.200 rp -34.8
DECOUPLER H1 lp -264.3
dn H1 PLOT
dof 0 wc 250
dm nny sc 0
decwave vs 1002
dpwr 36 th 9
dmf 10104 al cdc ph

```

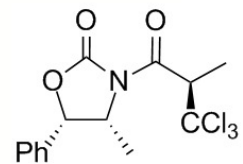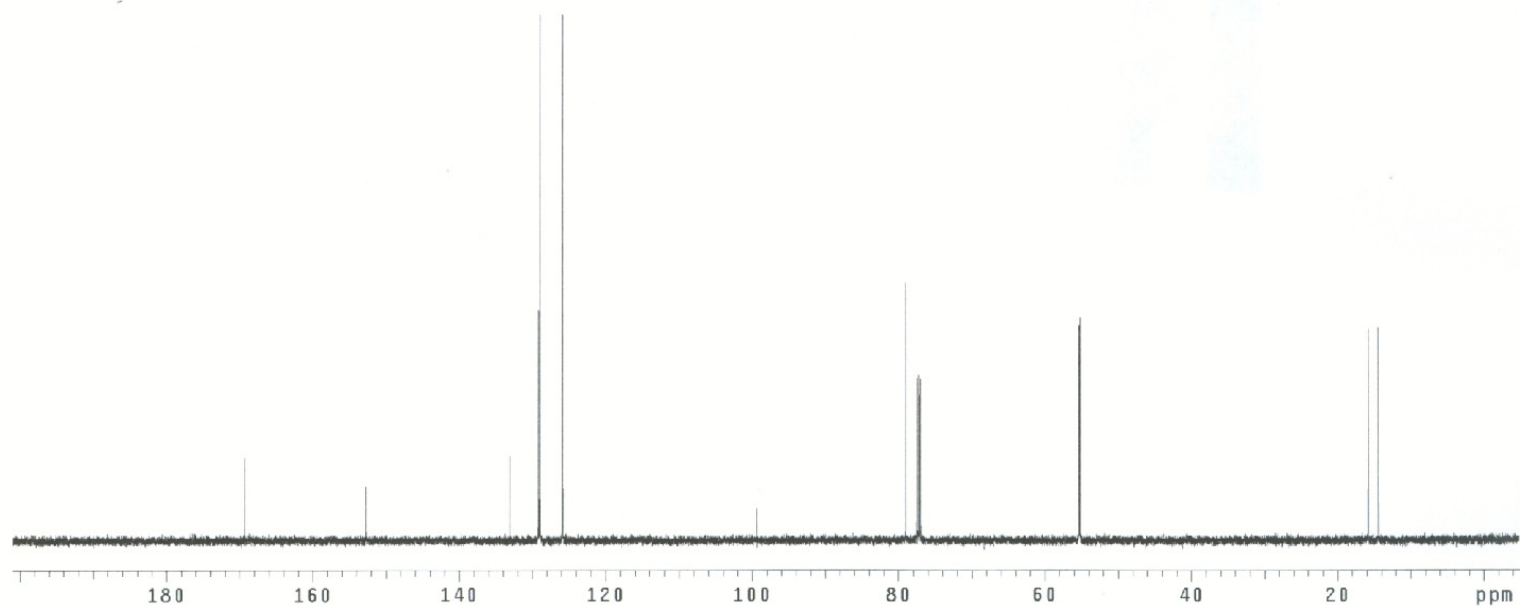

snb-1-164-a

exp1 s2pu1

| SAMPLE      |             | DEC. & VT  |         |
|-------------|-------------|------------|---------|
| date        | Oct 20 2009 | dn         | H1      |
| solvent     | cdc13       | dof        | -1425.0 |
| file        | exp         | dm         | nnn     |
| ACQUISITION |             | PROCESSING |         |
| sfrq        | 399.951     | dmm        | c       |
| tn          | H1          | dmf        | 200     |
| at          | 2.003       | lb         | 0.10    |
| np          | 20032       | fn         | 32768   |
| sw          | 5000.0      | math       | 1       |
| fb          | 3000        |            |         |
| bs          | 4           | werr       |         |
| pw          | 12.0        | wexp       |         |
| pw          | 12.0        | wbs        |         |
| tpwr        | 57          | wnt        |         |
| d1          | 4.000       | DISPLAY    |         |
| tof         | 0           | sp         | -24.4   |
| nt          | 8           | wp         | 3670.3  |
| ct          | 8           | vs         | 56      |
| alock       | n           | sc         | 0       |
| gain        | not used    | wc         | 250     |
| FLAGS       |             | hzmm       | 14.68   |
| ll          | n           | is         | 151.00  |
| in          | n           | rfl        | 3394.1  |
| dp          | y           | rfp        | 2903.6  |
| hs          | nn          | th         | 95      |
|             |             | ins        | 1.000   |
|             |             | ai         | ph      |

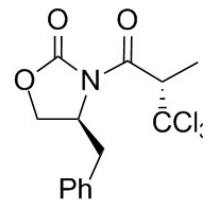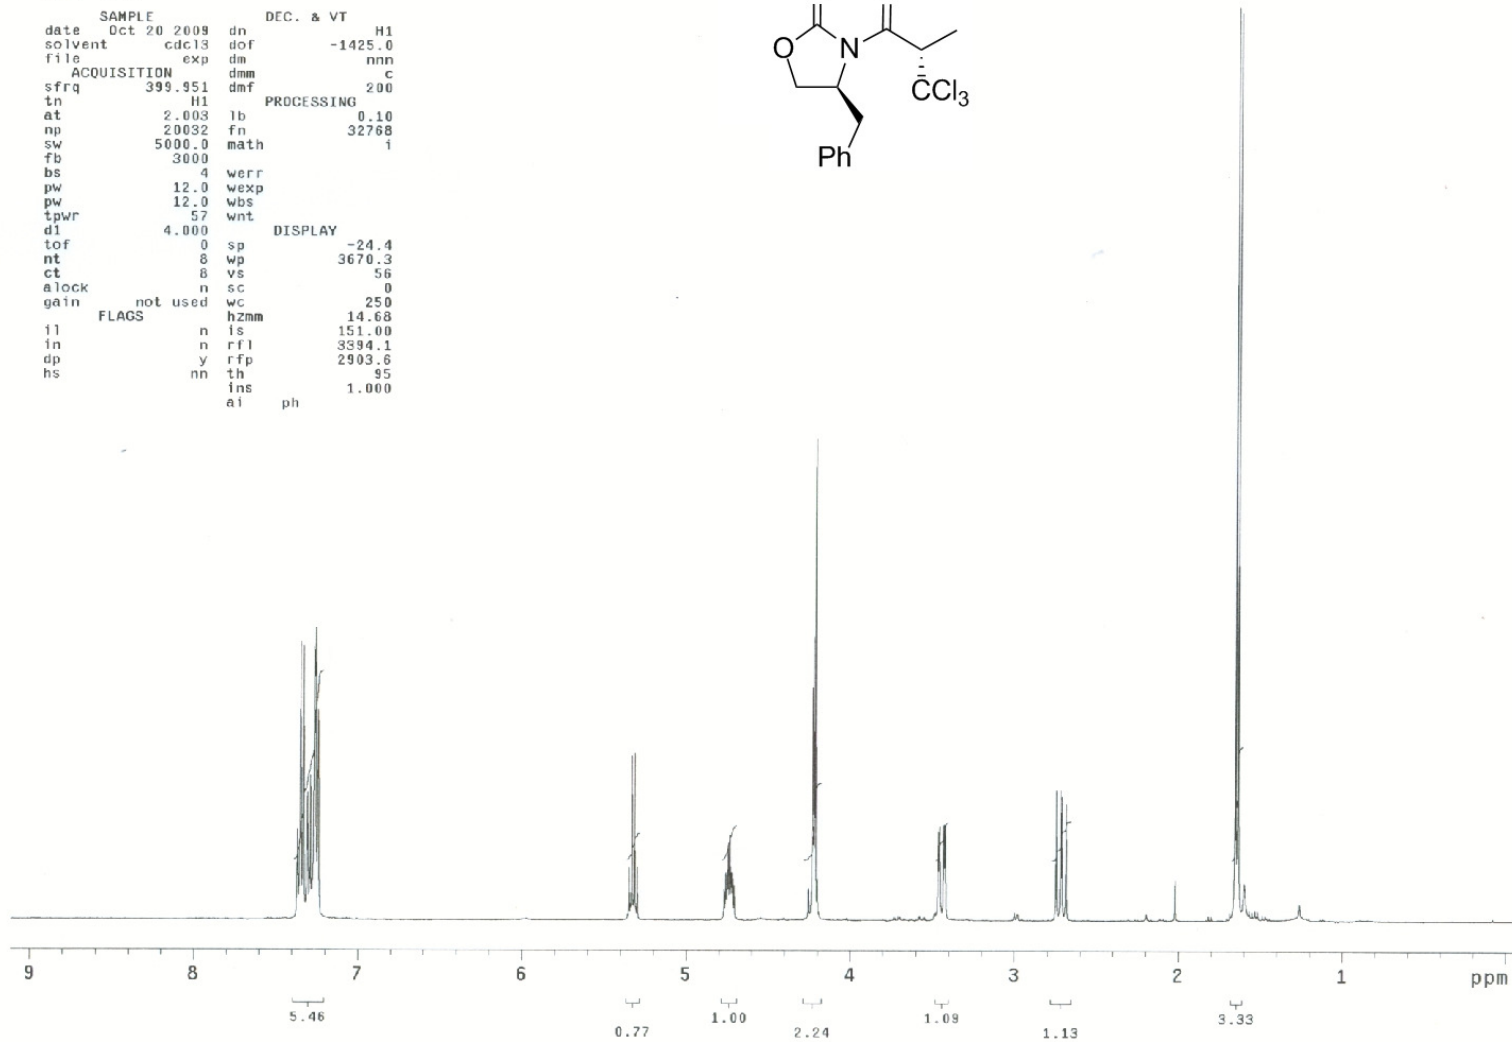

snb-1-164-a-13C

exp1 CARBON

| SAMPLE             |                | SPECIAL    |          |
|--------------------|----------------|------------|----------|
| date               | Oct 20 2009    | temp       | 22.0     |
| solvent            | CDCl3          | gain       | 42       |
| file               | /home/Zakaria~ | spin       | 20       |
| n/beamont/snb-1-1~ |                | hst        | 0.008    |
| 64-a-13C.500.fid   |                | pw90       | 9.200    |
| ACQUISITION        |                | alfa       | 10.000   |
| sw                 | 36003.6        | FLAGS      |          |
| at                 | 1.300          | il         | n        |
| np                 | 93644          | in         | n        |
| fb                 | 20000          | dp         | Y        |
| bs                 | 4              | hs         | nn       |
| d1                 | 4.000          | PROCESSING |          |
| nt                 | 256            | lb         | 0.50     |
| ct                 | 108            | fn         | not used |
| TRANSMITTER        |                | DISPLAY    |          |
| tn                 | C13            | sp         | -434.4   |
| sfrq               | 125.702        | wp         | 26027.0  |
| tof                | 865.4          | rfl        | 14905.1  |
| tpwr               | 56             | rfp        | 9707.0   |
| pw                 | 9.200          | rp         | -38.2    |
| DECOUPLER          |                | lp         | -301.9   |
| dn                 | H1             | PLOT       |          |
| dof                | 0              | wc         | 250      |
| dm                 | nyy            | sc         | 0        |
| decwave            |                | vs         | 3767     |
| dpr                | 36             | th         |          |
| dmf                | 10104          | ai         | cdc ph   |

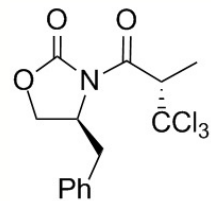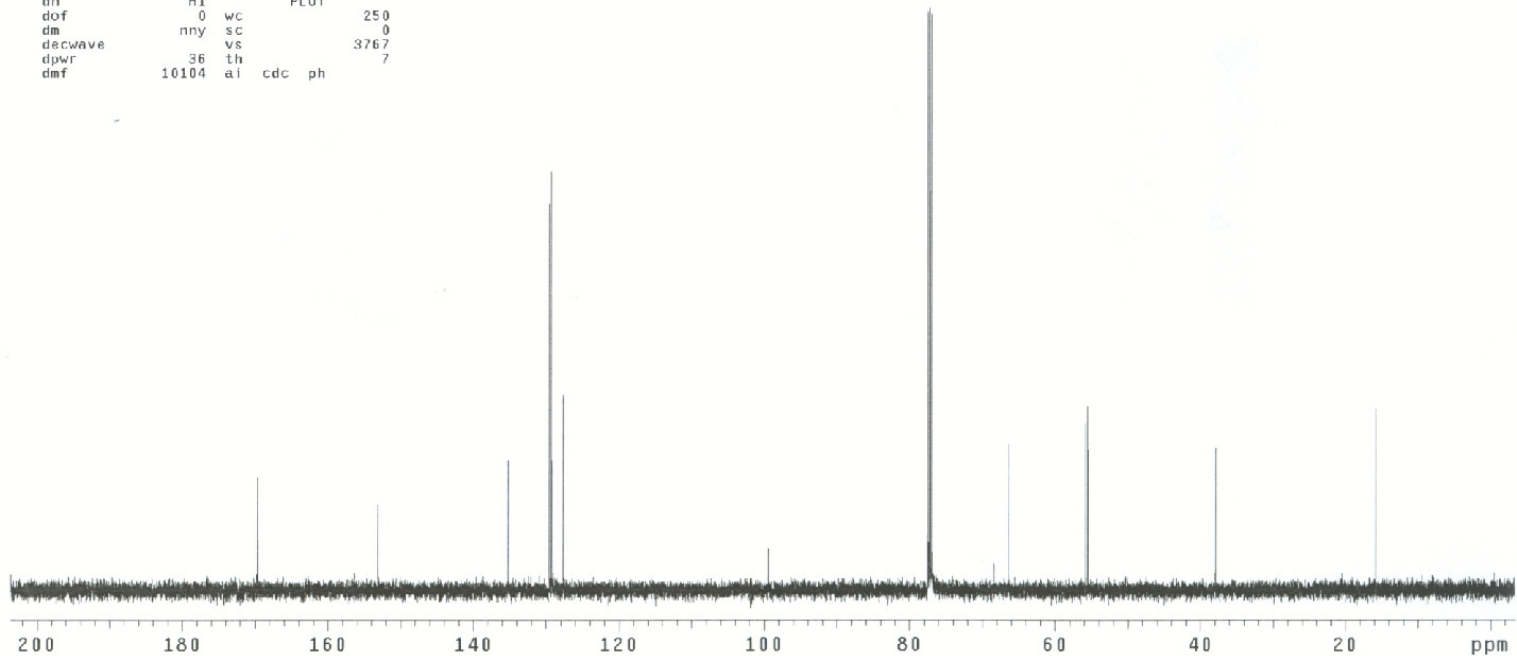



snb-1-256-a  
exp1 s2pu1

| SAMPLE      |             | DEC. & VT |        |
|-------------|-------------|-----------|--------|
| date        | Jul 13 2009 | dn        | F19    |
| solvent     | cdcl3       | dof       | 0      |
| file        | exp         | dm        | nnn    |
| ACQUISITION |             | dmf       |        |
| sfrq        | 499.859     | dmm       | c      |
| tn          | H1          | dmf       | 200    |
| PROCESSING  |             |           |        |
| at          | 2.568       | fn        | 32768  |
| np          | 32000       | math      | 1      |
| sw          | 5897.0      |           |        |
| fb          | 3000        | werr      |        |
| bs          | 4           | wexp      | wft    |
| pw          | 7.0         | wbs       |        |
| pw          | 7.0         | wnt       |        |
| tpwr        | 53          |           |        |
| DISPLAY     |             |           |        |
| d1          | 1.000       | sp        | -46.0  |
| tof         | 0           | wp        | 4751.3 |
| nt          | 16          | vs        | 88     |
| ct          | 16          | sc        | 0      |
| alock       | n           | wc        | 250    |
| gain        | not used    | hzmm      | 19.05  |
| FLAGS       |             |           |        |
| il          | n           | rfl       | 500.00 |
| in          | n           | rfp       | 4131.4 |
| dp          | y           | th        | 3629.0 |
| hs          | nn          | ins       | 48     |
|             | ai          | ph        | 1.000  |

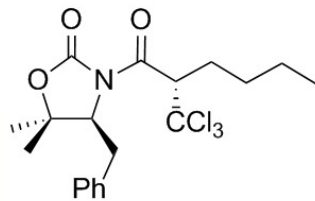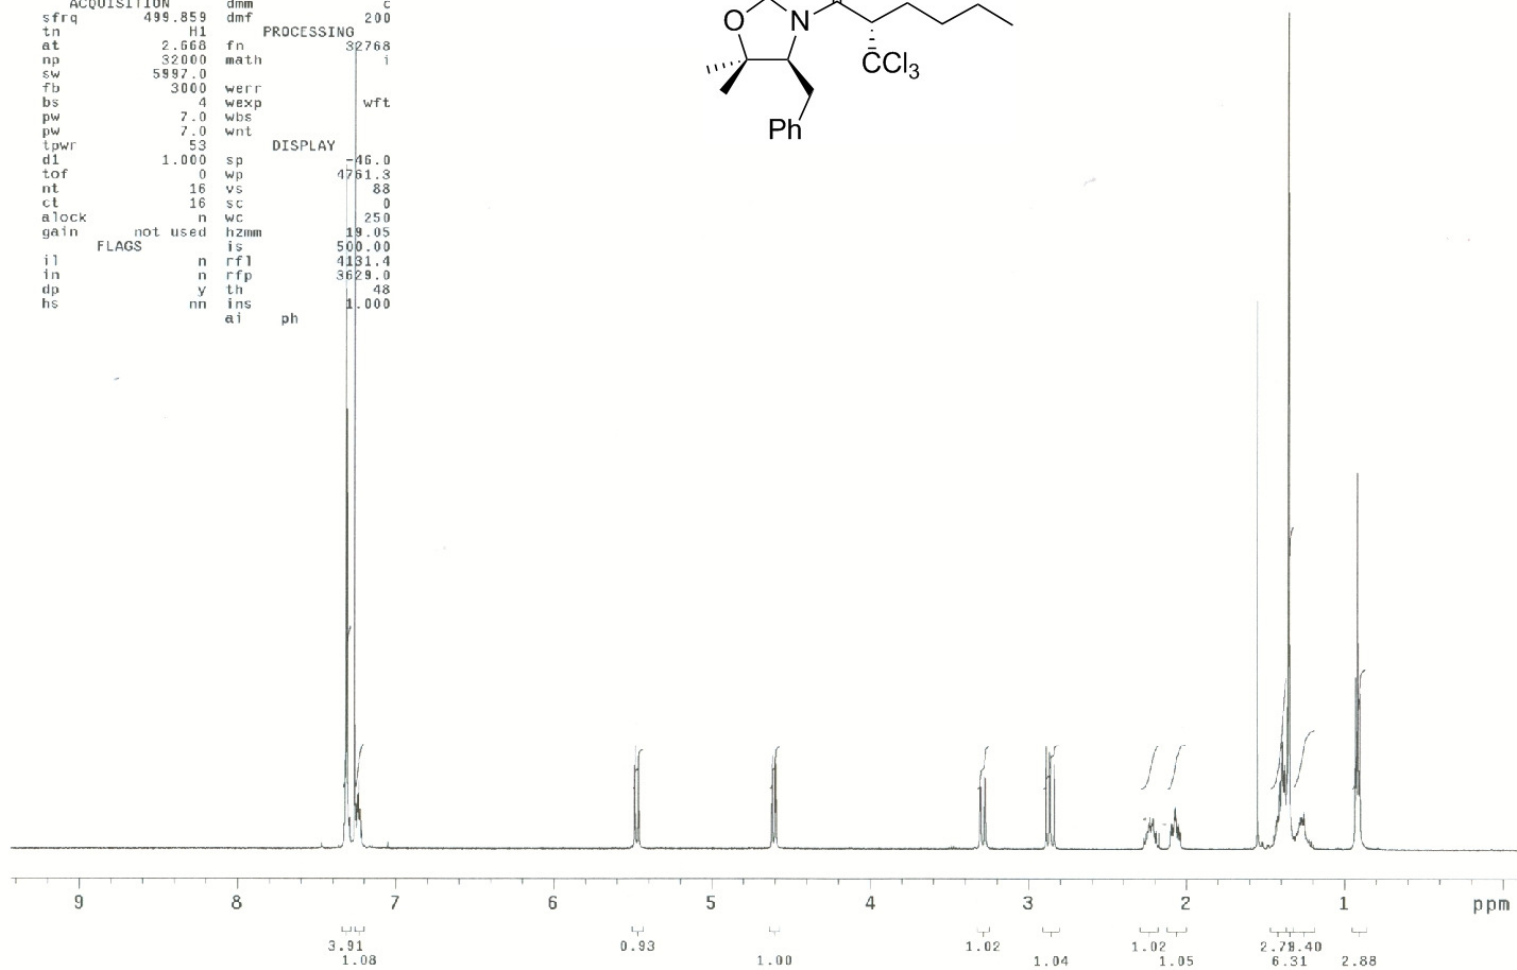

snb-1-252-a-13c

exp1 CARBON

| SAMPLE              |                | SPECIAL    |          |
|---------------------|----------------|------------|----------|
| date                | Jul 14 2009    | temp       | 22.0     |
| solvent             | CDCl3          | gain       | 42       |
| file                | /home/Zakaria- | spin       | 20       |
| n/beaumont/snb-1-2- |                | hst        | 0.008    |
| 56-a-13c.500.fid    |                | pw90       | 9.200    |
| ACQUISITION         |                | alfa       | 10.000   |
| sw                  | 36003.6        | FLAGS      |          |
| at                  | 1.300          | il         | n        |
| np                  | 93644          | in         | n        |
| fb                  | 20000          | dp         | y        |
| bs                  | 4              | hs         | nn       |
| d1                  | 1.000          | PROCESSING |          |
| nt                  | 184            | lb         | 0.50     |
| ct                  | 92             | fn         | not used |
| TRANSMITTER         |                | DISPLAY    |          |
| tn                  | C13            | sp         | -287.2   |
| sfrq                | 125.702        | wp         | 25699.0  |
| tof                 | 865.4          | rfl        | 14907.7  |
| tpwr                | 56             | rfp        | 9707.0   |
| pw                  | 9.200          | rp         | -53.8    |
| DECOUPLER           |                | lp         | -247.4   |
| dn                  | H1             | PLOT       |          |
| dof                 | 0              | wc         | 250      |
| dm                  | nyy            | sc         | 0        |
| decwave             |                | vs         | 3002     |
| dpwr                | 36             | th         | 7        |
| dmf                 | 10104          | ai         | cdc ph   |

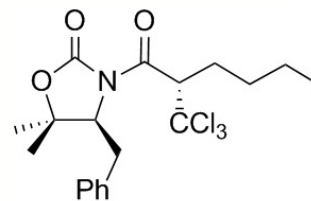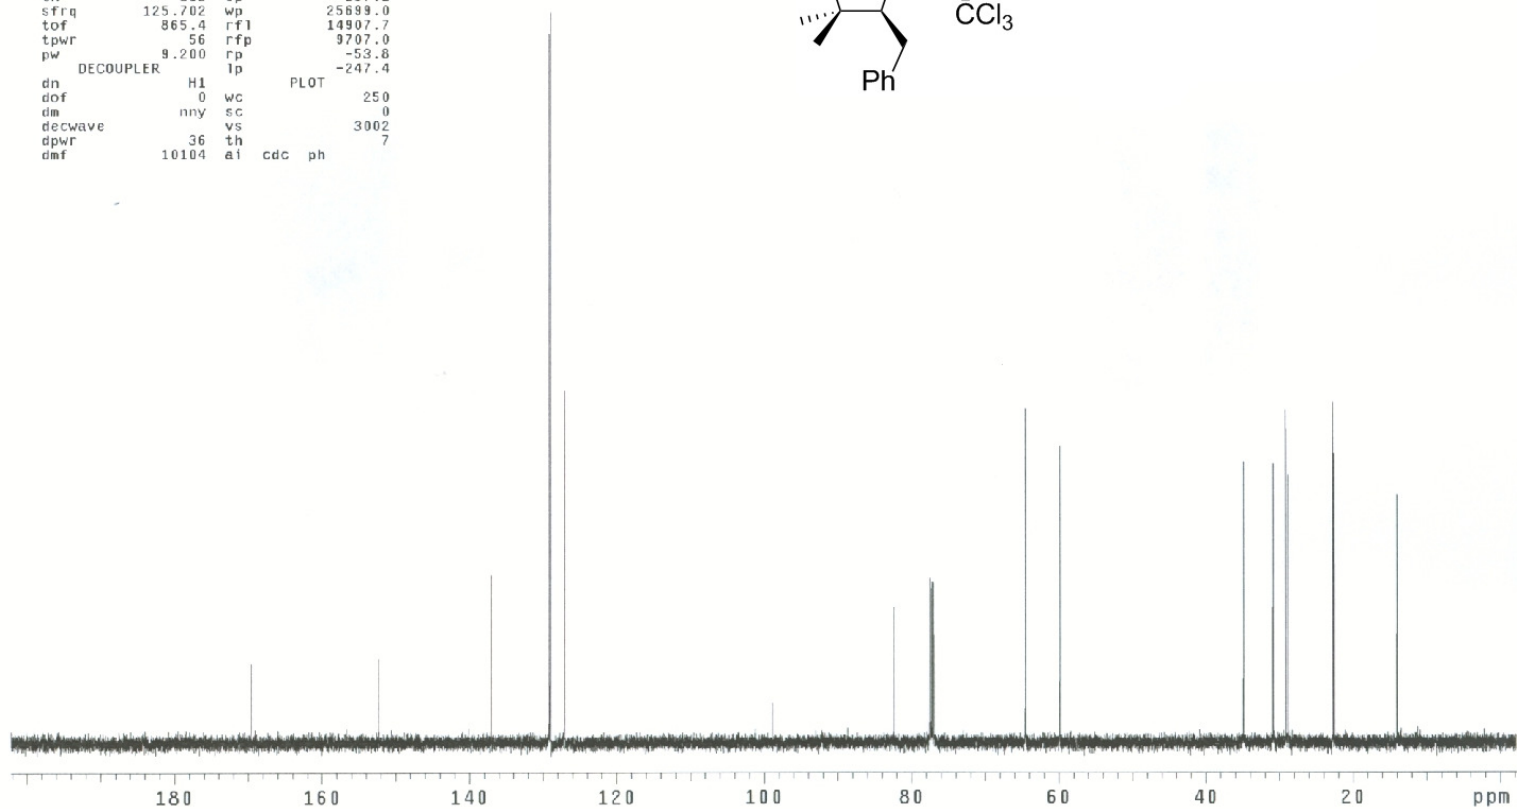

snb-1-269-a

expl s2pu1

| SAMPLE      |            | DEC. & VT |         |
|-------------|------------|-----------|---------|
| date        | Aug 5 2009 | dn        | dof F19 |
| solvent     | cdcl3      | dof       | 0       |
| file        | exp        | dm        | nnn     |
| ACQUISITION |            | dmf       |         |
| sfrq        | 499.859    | dmm       | c       |
| tn          | H1         | dmf       | 200     |
| PROCESSING  |            | 32768     |         |
| at          | 2.668      | fn        | i       |
| np          | 32000      | math      |         |
| sw          | 5997.0     |           |         |
| fb          | 3000       | werr      |         |
| bs          | 4          | wexp      | wft     |
| pw          | 7.0        | wbs       |         |
| pw          | 7.0        | wnt       |         |
| tpwr        | 53         |           |         |
| d1          | 4.000      | sp        | -55.1   |
| tof         | 0          | wp        | 4892.1  |
| nt          | 8          | vs        | 103     |
| ct          | 8          | sc        | 0       |
| alock       | n          | wc        | 250     |
| gain        | not used   | hzmm      | 18.77   |
| FLAGS       |            | is        |         |
| il          | n          | rfl       | 227.00  |
| in          | n          | rfp       | 4130.6  |
| dp          | y          | th        | 3629.0  |
| hs          | nn         | ins       | 13      |
|             | at         | ph        | 1.000   |

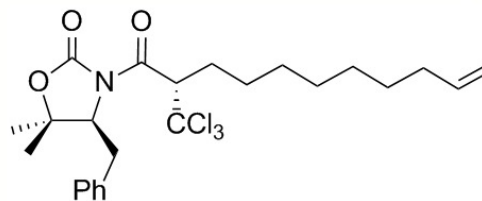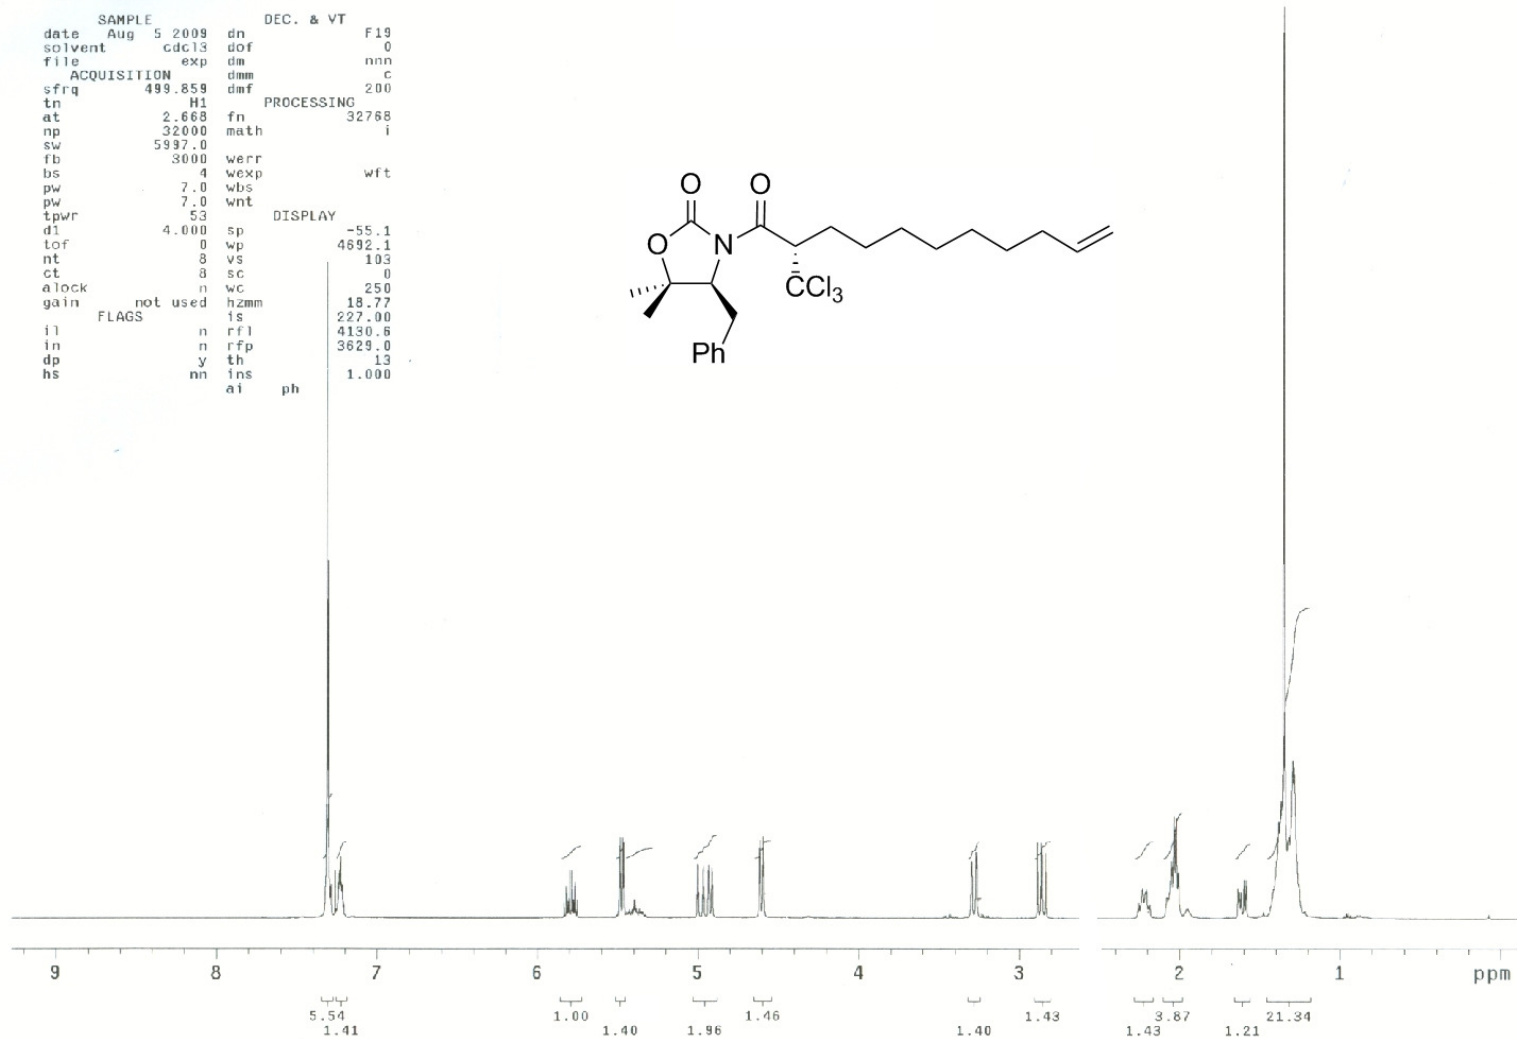

snb-1-289-a-13C

exp1 CARBON

| SAMPLE              |                | SPECIAL    |          |
|---------------------|----------------|------------|----------|
| date                | Aug 5 2009     | temp       | 22.0     |
| solvent             | CDCl3          | gain       | 42       |
| file                | /home/Zakaria~ | spin       | 20       |
| n/beaumont/snb-1-2~ |                | hst        | 0.008    |
| 69-a-13C.500.fid    |                | pw90       | 9.200    |
| ACQUISITION         |                | alfa       | 10.000   |
| sw                  | 36003.6        | FLAGS      |          |
| at                  | 1.300          | il         | n        |
| np                  | 93644          | in         | n        |
| fb                  | 20000          | dp         | y        |
| bs                  | 4              | hs         | nn       |
| d1                  | 1.000          | PROCESSING |          |
| nt                  | 128            | lb         | 0.50     |
| ct                  | 128            | fn         | not used |
| TRANSMITTER         |                | DISPLAY    |          |
| tn                  | C13            | sp         | -379.0   |
| sfrq                | 125.702        | wp         | 26027.0  |
| tof                 | 865.4          | rfl        | 14910.5  |
| lpwr                | 56             | rflp       | 9707.0   |
| pw                  | 9.200          | rp         | 37.4     |
| DECOUPLER           |                | lp         | -259.2   |
| dn                  | H1             | PLOT       |          |
| dof                 | 0              | wc         | 250      |
| dm                  | nny            | sc         | 0        |
| decwave             |                | vs         | 2771     |
| dpr                 | 36             | th         | 3        |
| dmf                 | 10104          | al         | cdc ph   |

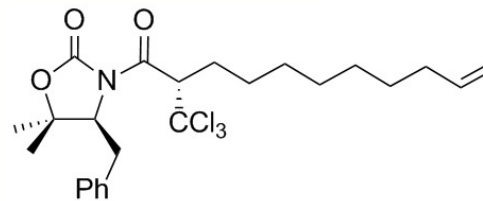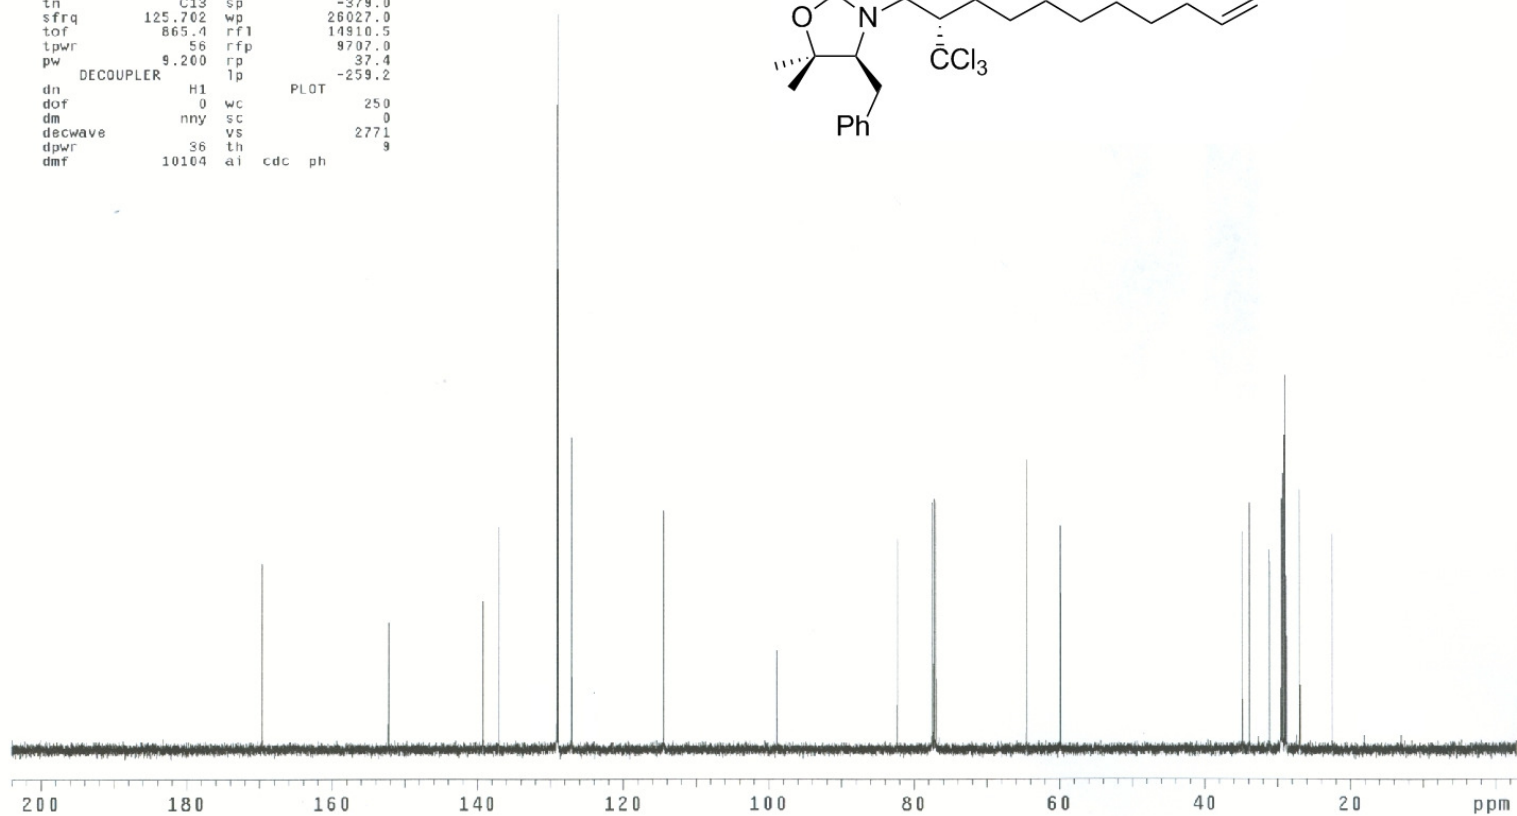

```

snb-1-267-a
exp1 s2pu1
SAMPLE
date Aug 4 2009 dn DEC. & VT F19
solvent cdc13 dof 0
file exp dm nnn
ACQUISITION dmm c
sfrq 499.859 dmf 200
IN
at 2.668 fn PROCESSING 92768
np 32000 math 1
sw 5997.0
fb 3000 werr
bs 4 wexp wft
pw 7.0 wbs
pw 7.0 wnt
tpwr 53
d1 4.000 sp DISPLAY
tof 0 wp -30.2
nt 8 vs 4592.9
ct 8 sc 65
alock n wc 250
gain not used hzmm 18.37
FLAGS n rf1 227.00
in n rfp 4130.6
dp y th 3629.0
hs nn ins 13
at 1.000

```

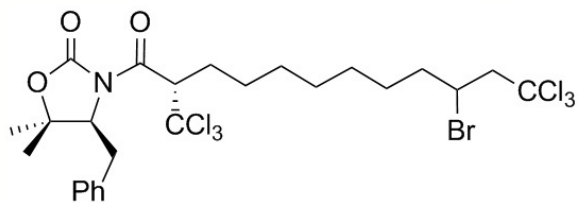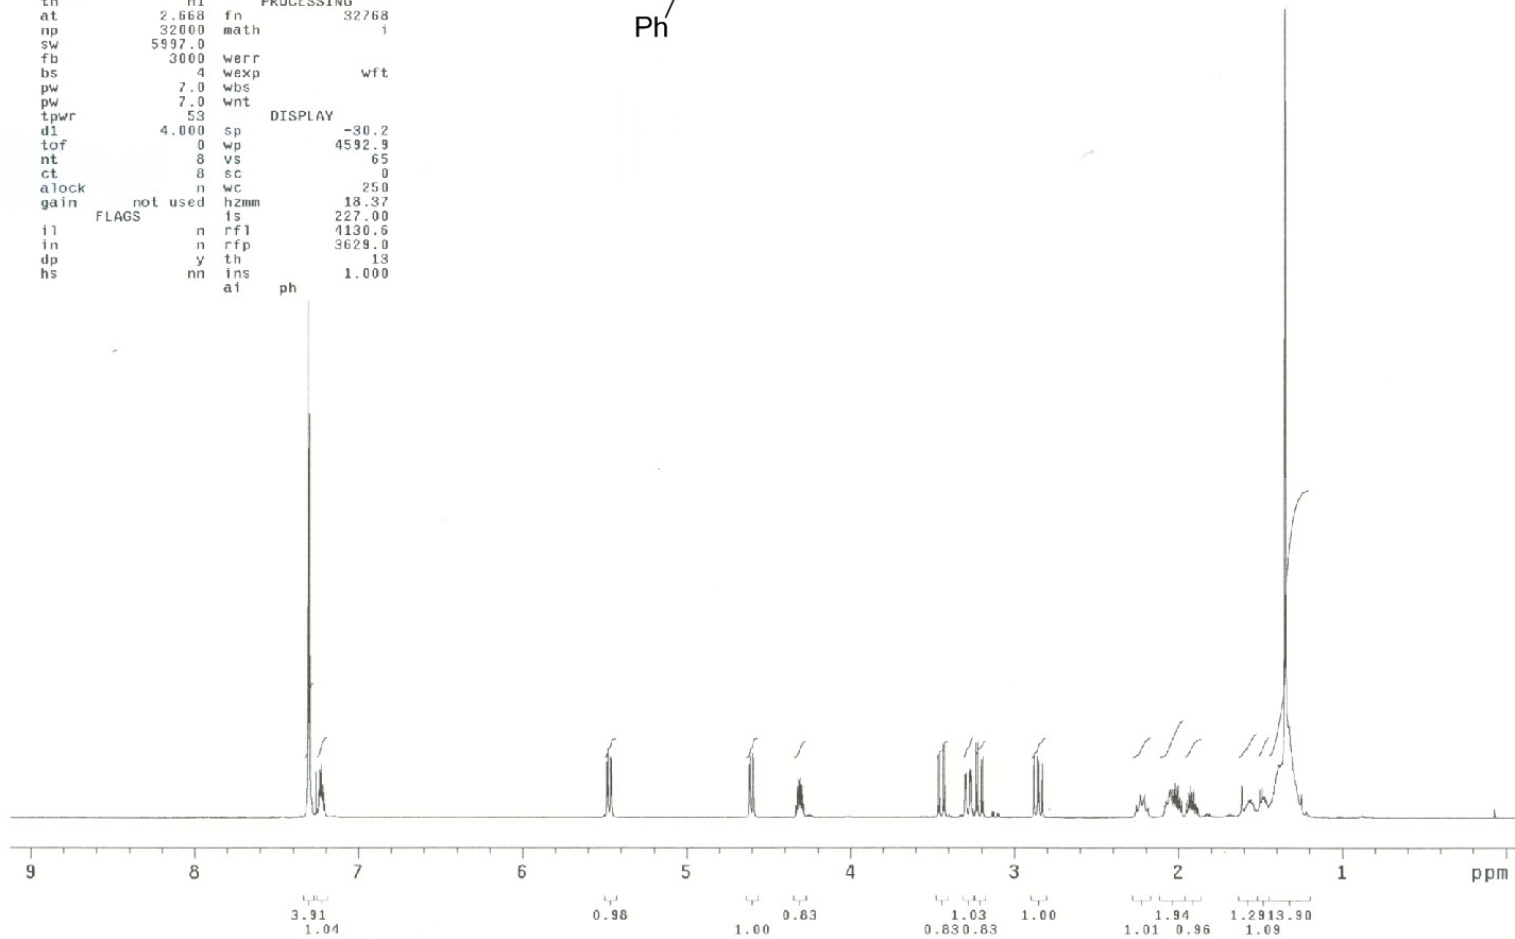

snb-1-267-a-13C

exp1 CARBON

| SAMPLE             |                | SPECIAL    |          |
|--------------------|----------------|------------|----------|
| date               | Aug 4 2009     | temp       | 22.0     |
| solvent            | CDCl3          | gain       | 42       |
| file               | /home/Zakaria~ | spin       | 20       |
| n/beamont/snb-1-2~ |                | hst        | 0.008    |
| 67-a-13C.500.fid   |                | pw90       | 9.200    |
| ACQUISITION        |                | alfa       | 10.000   |
| sw                 | 36003.6        | FLAGS      |          |
| at                 | 1.300          | il         | n        |
| np                 | 93644          | in         | n        |
| fb                 | 20000          | dp         | y        |
| bs                 | 4              | hs         | nn       |
| d1                 | 1.000          | PROCESSING |          |
| nt                 | 128            | lb         | 0.50     |
| ct                 | 79             | fn         | not used |
| TRANSMITTER        |                | DISPLAY    |          |
| tn                 | C13            | sp         | -201.5   |
| sfrq               | 125.702        | wp         | 25788.6  |
| tof                | 865.4          | rfl        | 14911.6  |
| tpwr               | 56             | rfp        | 9707.0   |
| pw                 | 9.200          | rp         | -74.2    |
| DECOUPLER          |                | lp         | -278.4   |
| dn                 | H1             | PLOT       |          |
| dof                | 0              | wc         | 250      |
| dm                 | nyy            | sc         | 0        |
| decwave            |                | vs         | 2980     |
| dpr                | 36             | th         | 9        |
| dmf                | 10104          | al         | cdc ph   |

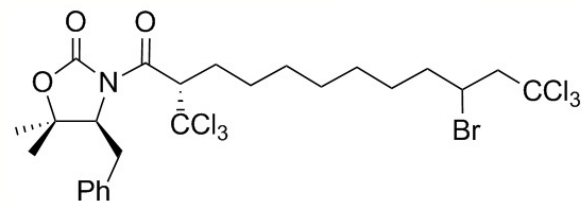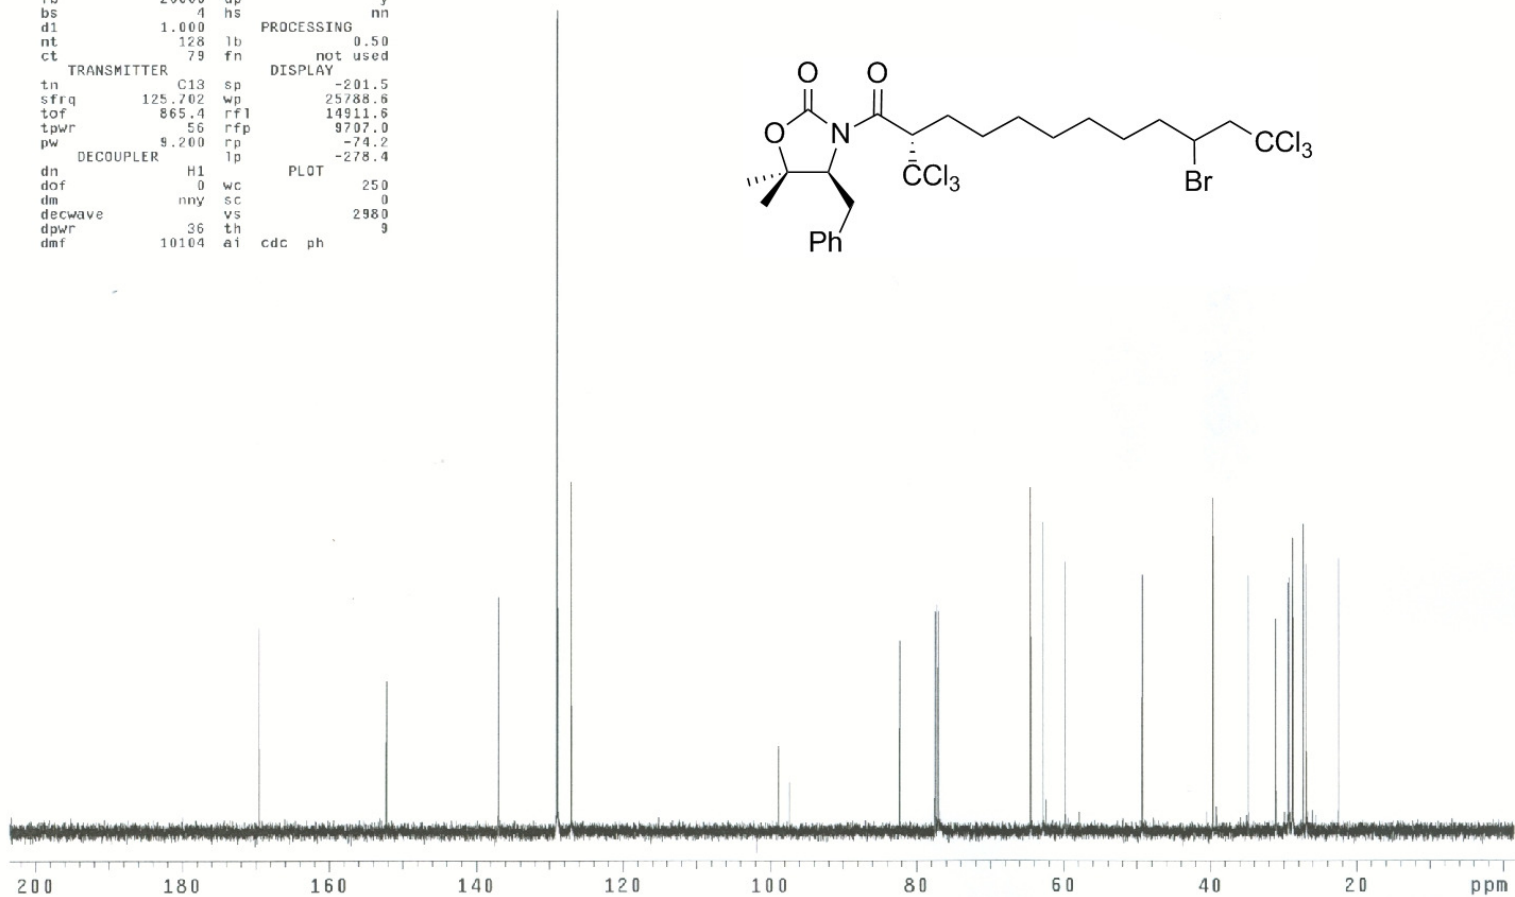

snb-1-289-a

exp1 s2pu1

```
SAMPLE      DEC. & VT
date Jul 31 2009 dn H1
solvent cdc13 dof -1425.0
file      exp  dn nnn
ACQUISITION dmm c
sfrq 399.951 dmf 200
tn H1 PROCESSING
at 2.003 lb 0.10
np 20032 fn 32768
sw 5000.0 math 1
fb 3000
bs 4 warr
pw 12.0 wexp
pwr 12.0 wbs
tpwr 57 wnt
d1 4.000 DISPLAY
tof 0 sp -49.7
nt 8 wp 3713.6
ct 8 vs 71
alock n n 0
gain not used wc 250
FLAGS hzmm 14.85
il n is 267.97
in n rfl 3395.6
dp y rfp 2903.6
hs nn th 4
ins 1.000
ai ph
```

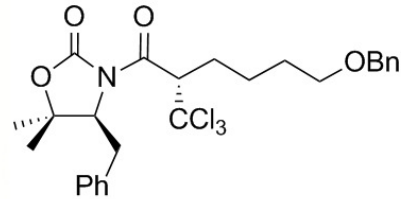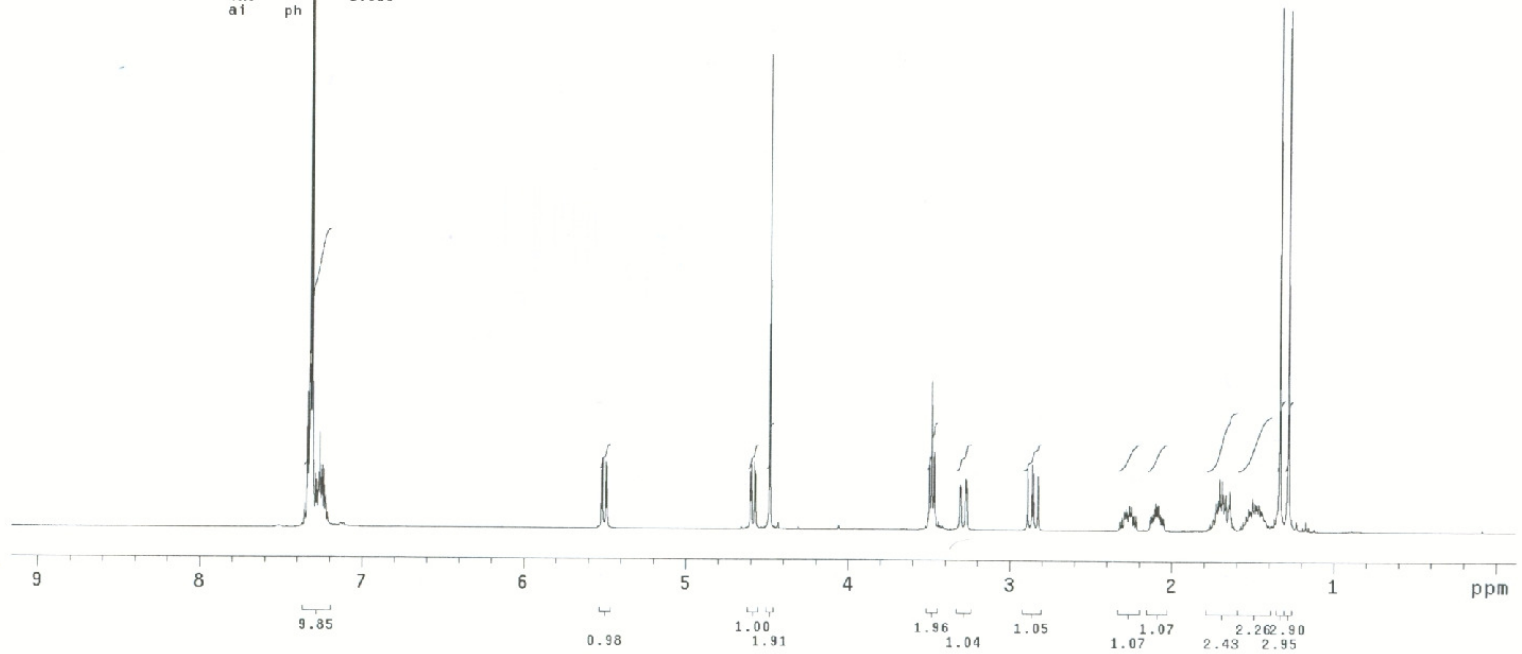

snb-1-289-a-13C

exp1 CARBON

| SAMPLE              |                | SPECIAL    |          |
|---------------------|----------------|------------|----------|
| date                | Aug 3 2009     | temp       | 22.0     |
| solvent             | CDCl3          | gain       | 42       |
| file                | /home/Zakaria~ | spin       | 20       |
| n/beaumont/snb-1-2- |                | hst        | 0.008    |
| 89-a-13C.500.fid    |                | pw90       | 8.200    |
| ACQUISITION         | alpha          | 10.000     |          |
| sw                  | 36003.6        | FLAGS      |          |
| at                  | 1.300          | il         | n        |
| np                  | 93644          | in         | n        |
| fb                  | 20000          | dp         | y        |
| bs                  | 4              | hs         | nn       |
| d1                  | 1.000          | PROCESSING |          |
| nt                  | 400            | lb         | 0.50     |
| ct                  | 112            | fn         | not used |
| TRANSMITTER         | C13            | DISPLAY    |          |
| tn                  |                | sp         | -232.3   |
| sfrq                | 125.702        | wp         | 25689.0  |
| tof                 | 865.4          | rfl        | 14912.7  |
| tpwr                | 56             | rfp        | 9707.0   |
| pw                  | 9.200          | rp         | -34.6    |
| DECOUPLER           | H1             | lp         | -281.4   |
| dn                  |                | PLOT       |          |
| dof                 | 0              | wc         | 250      |
| dm                  | nny            | sc         | 0        |
| decwave             |                | vs         | 2128     |
| dpwr                | 36             | th         | 9        |
| dmf                 | 10104          | al         | cdc ph   |

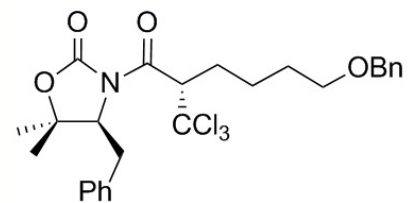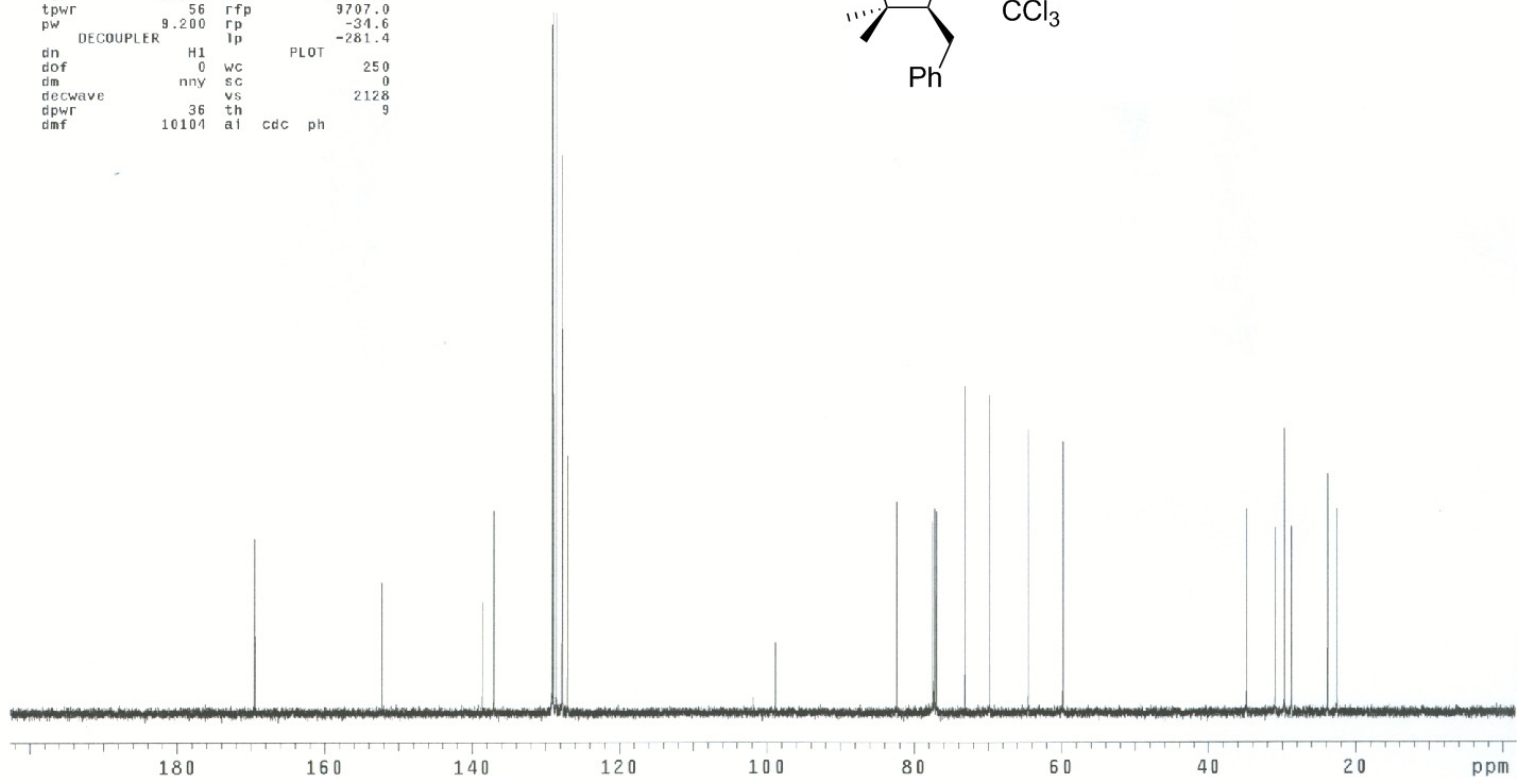



```

snb-1-252-a
exp1 s2pu1
SAMPLE
date Jul 6 2009 dn DEC. & VT F19
solvent cdc13 dof 0
file exp dm nnn
ACQUISITION dmm c
sfrq 499.859 dmf 200
fn
at 2.688 fn PROCESSING 32768
np 32000 math i
sw 5997.0
fb 3000 werr
bs 4 wexp wft
pw 7.0 wbs
pw 7.0 wht
tpwr 53 DISPLAY
d1 1.000 sp -111.1
tof 0 wp 4428.3
nt 8 vs 64
ct 8 sc 0
alock n wc 250
gain not used hzmm 17.72
FLAGS n is 211.62
i1 n rfl 4132.1
in n rfp 3629.0
dp y th 4
hs nn ins 1.000
all ph

```

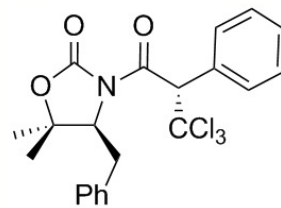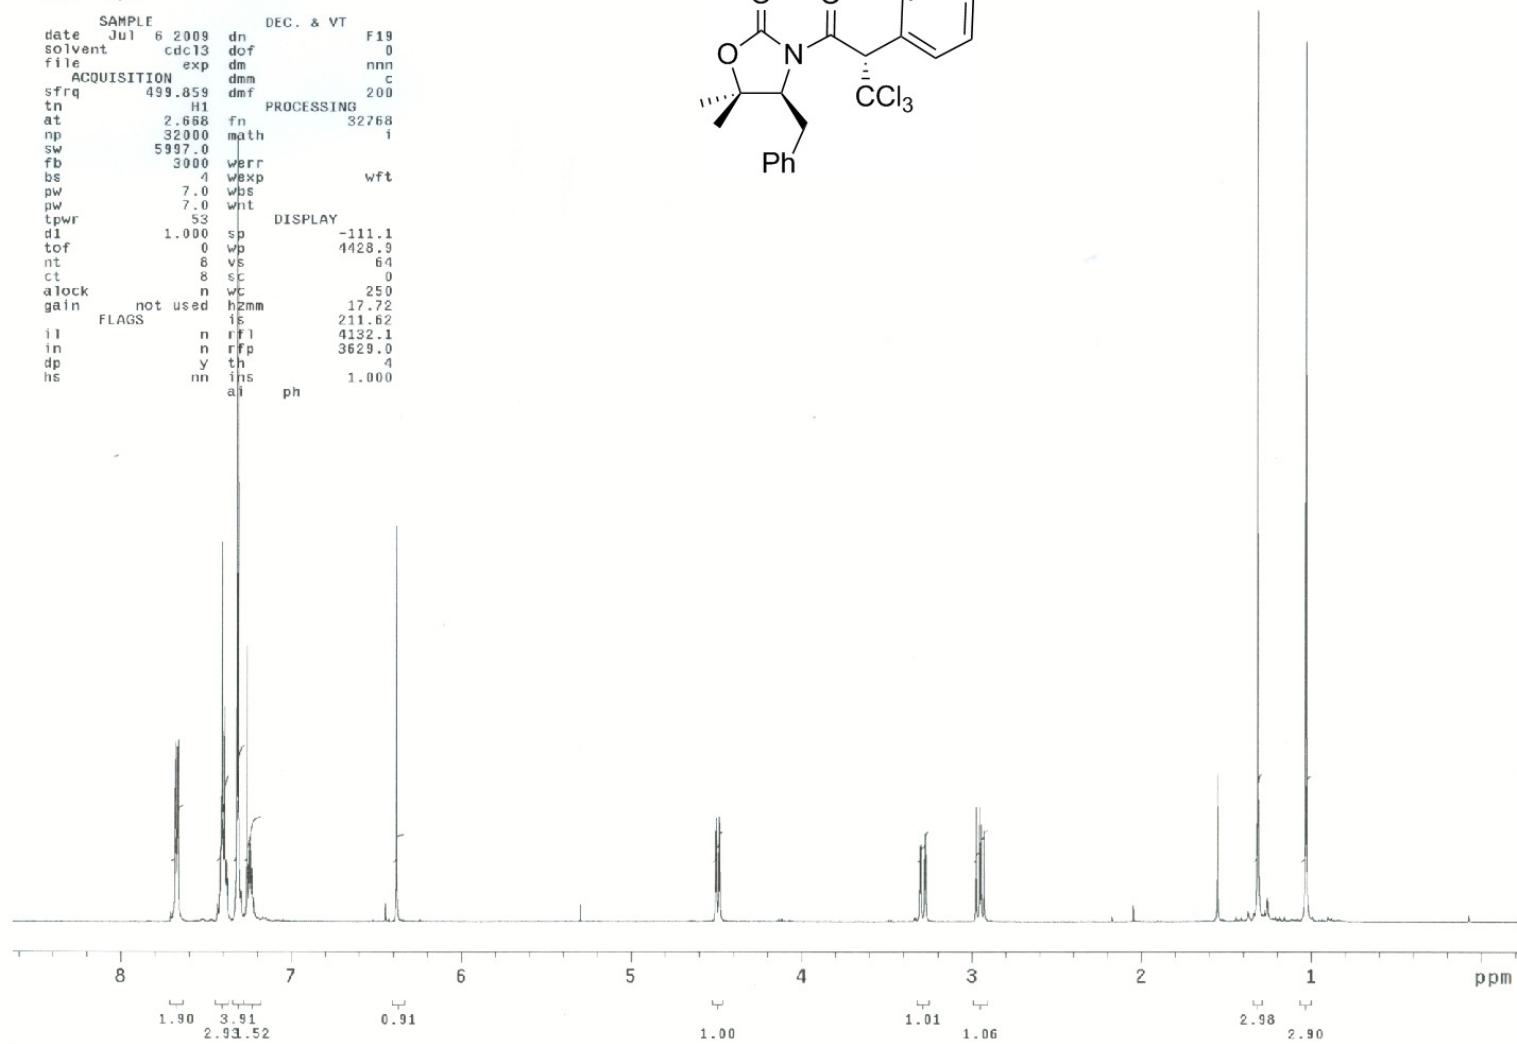

snb-1-252-a-13c

exp1 CARBON

| SAMPLE             |               | SPECIAL    |           |
|--------------------|---------------|------------|-----------|
| date               | Jul 6 2009    | temp       | 22.0      |
| solvent            | CDC13         | gain       | 42        |
| file               | /home/Zakaria | spin       | 20        |
| n/beaumont/snb-1-2 |               | hst        | 0.008     |
| 52-a-13c.500.fid   |               | pw90       | 9.200     |
| ACQUISITION        |               | alfa       | 10.000    |
| sw                 | 36003.6       | FLAGS      |           |
| at                 | 1.800         | il         | n         |
| np                 | 93644         | in         | n         |
| fb                 | 20000         | dp         | y         |
| bs                 | 4             | hs         | nn        |
| d1                 | 1.000         | PROCESSING |           |
| nt                 | 92            | lb         | 0.50      |
| ct                 | 92            | fn         | not used  |
| TRANSMITTER        |               | DISPLAY    |           |
| tn                 | C13           | sp         | -552.6    |
| sfrq               | 125.702       | wp         | 26443.4   |
| tof                | 865.4         | rf1        | 14905.5   |
| tpwr               | 56            | rfp        | 9707.0    |
| pw                 | 9.200         | rp         | -32.3     |
| DECOUPLER          |               | lp         | -332.8    |
| dn                 | H1            | PLOT       |           |
| dof                | 0             | wc         | 250       |
| dm                 | nnn           | sc         | 0         |
| decwave            |               | vs         | 6519      |
| dpwr               | 36            | th         |           |
| dmf                | 10104         | ai         | cdc ph 11 |

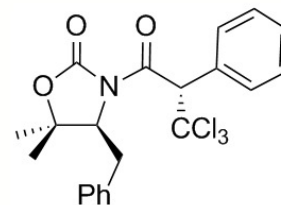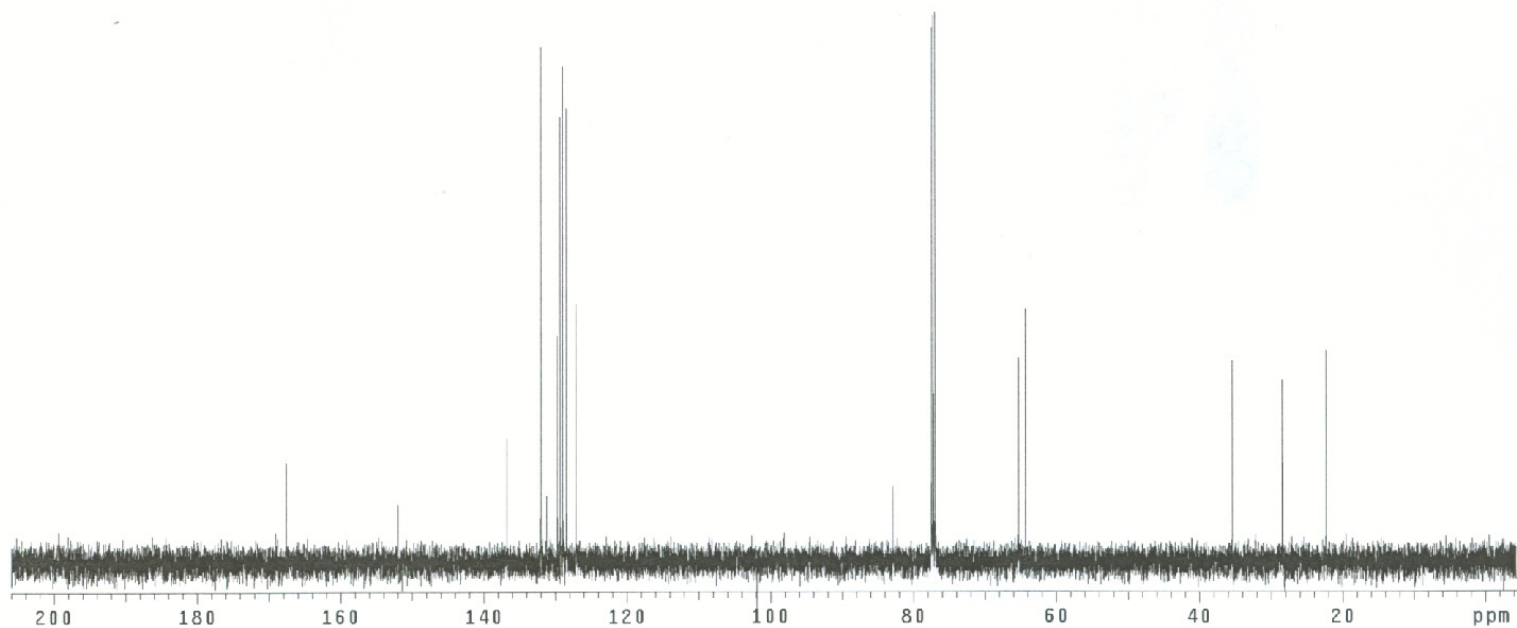

snb-2-009-a

expl s2pu1

| SAMPLE      |             | DEC. & VT  |         |
|-------------|-------------|------------|---------|
| date        | Aug 18 2009 | dn         | H1      |
| solvent     | cdc13       | dof        | -1425.0 |
| file        | exp         | dm         | nnn     |
| ACQUISITION |             | dmm        | c       |
| sfrq        | 399.851     | dmf        | 200     |
| tn          | H1          | PROCESSING |         |
| at          | 2.003       | lb         | 0.10    |
| np          | 20032       | fn         | 32768   |
| sw          | 5000.0      | math       | 1       |
| fb          | 3000        |            |         |
| bs          | 4           | werr       |         |
| pw          | 12.0        | wexp       |         |
| pw          | 12.0        | wbs        |         |
| tpwr        | 57          | wnt        |         |
| d1          | 4.000       | DISPLAY    |         |
| tof         | 0           | sp         | -17.4   |
| nt          | 8           | wp         | 4035.0  |
| ct          | 8           | vs         | 54      |
| alock       |             | n          | sc      |
| gain        | not used    | wc         | 250     |
| FLAGS       |             | hzmm       | 16.14   |
| il          | n           | is         | 127.06  |
| in          | n           | rfl        | 3396.5  |
| dp          | y           | rfp        | 2903.6  |
| hs          | nn          | th         | 6       |
|             |             | ins        | 1.000   |
|             |             | ai         | ph      |

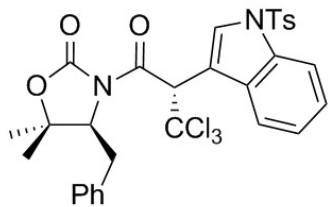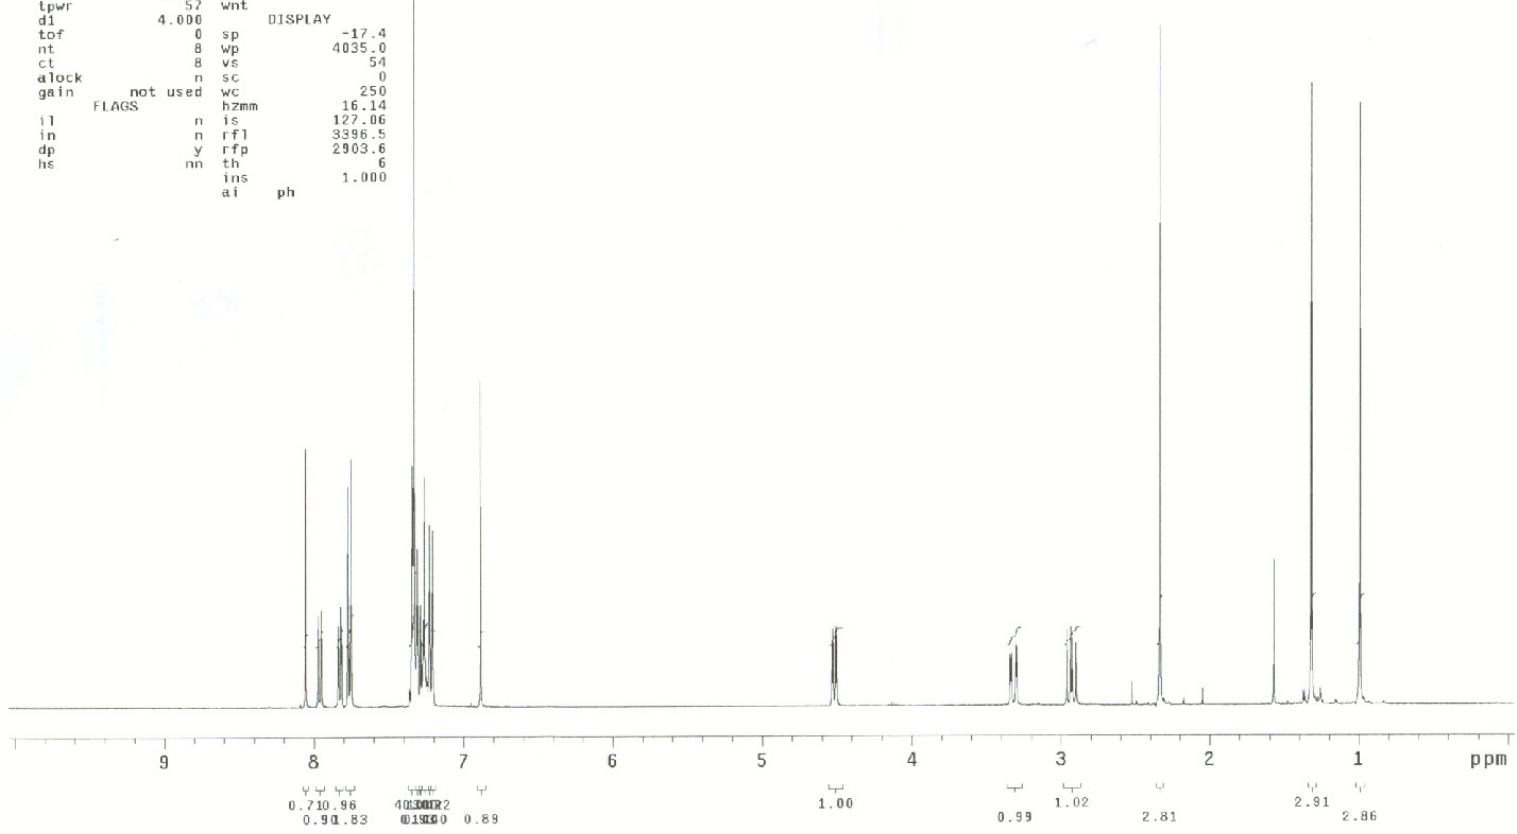

snb-2-009-a-13C

exp1 CARBON

| SAMPLE             |               | SPECIAL    |          |
|--------------------|---------------|------------|----------|
| date               | Aug 18 2009   | temp       | 22.0     |
| solvent            | CDCl3         | gain       | 42       |
| file               | /home/Zakaria | spin       | 20       |
| n/beaumont/snb-2-0 |               | hst        | 0.008    |
| 09-a-13C.500.fid   |               | pw90       | 9.200    |
| ACQUISITION        | alfa          | alpha      | 10.000   |
| ACQUISITION        |               | FLAGS      |          |
| sw                 | 36003.6       |            |          |
| at                 | 1.300         | il         | n        |
| np                 | 93644         | in         | n        |
| fb                 | 20000         | dp         | y        |
| bs                 | 4             | hs         | nn       |
| d1                 | 1.000         | PROCESSING |          |
| nt                 | 312           | lb         | 0.50     |
| ct                 | 312           | fn         | not used |
| TRANSMITTER        |               | DISPLAY    |          |
| tn                 | C13           | sp         | -344.9   |
| sfrq               | 125.702       | wp         | 25728.7  |
| tof                | 865.4         | rf1        | 14906.1  |
| tpwr               | 56            | rfp        | 9707.0   |
| pw                 | 9.200         | rp         | -17.2    |
| DECOUPLER          |               | PLOT       |          |
| dn                 | H1            |            |          |
| dof                | 0             | wc         | 250      |
| dm                 | nyy           | sc         | 0        |
| decwave            |               | vs         | 7224     |
| dpr                | 36            | th         | 9        |
| dpr                | 10104         | a1         | cdc ph   |

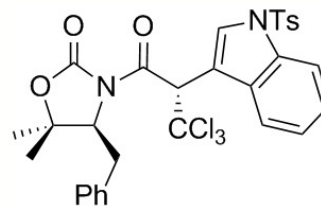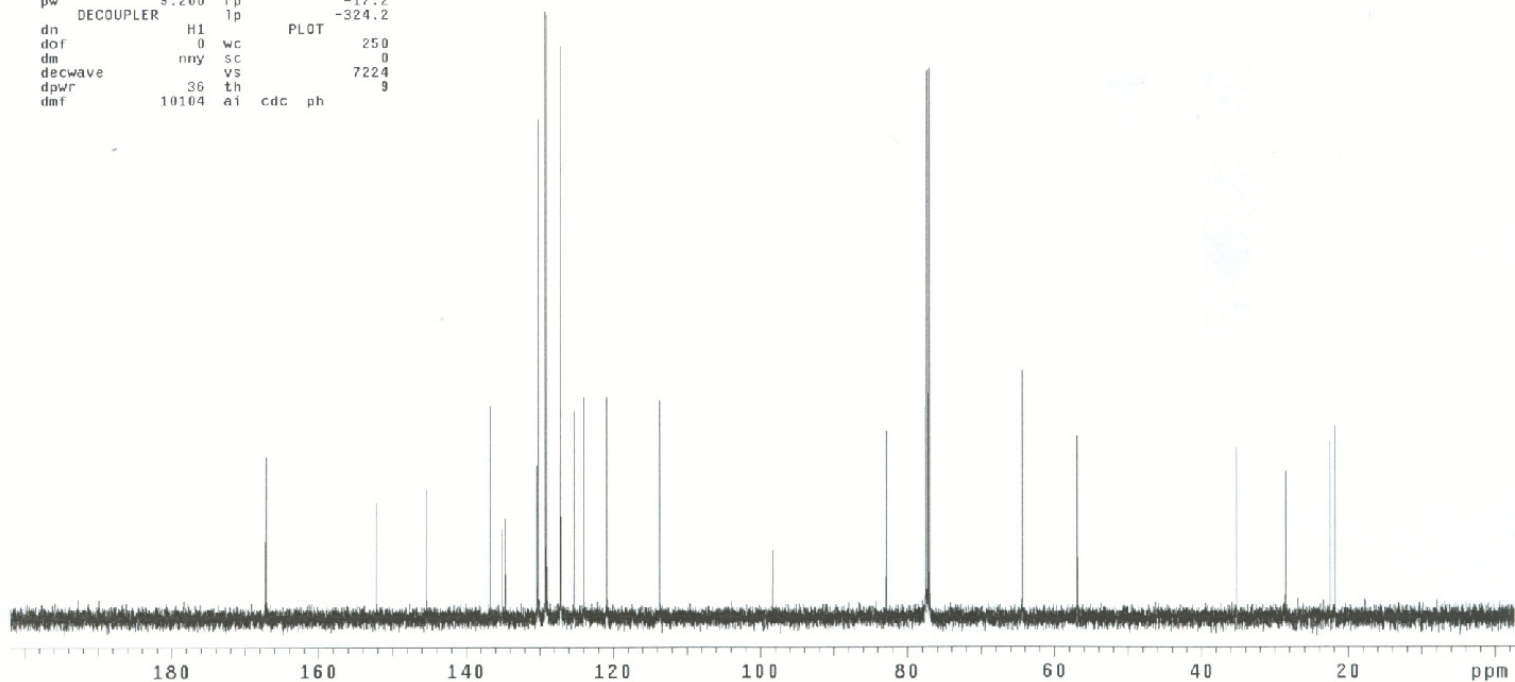

snb-2-019-a

exp1 s2pul

| SAMPLE      |            | DEC. & VT |        |
|-------------|------------|-----------|--------|
| date        | Sep 7 2009 | dn        | F19    |
| solvent     | cdc13      | dof       | 0      |
| file        | exp        | dm        | nnn    |
| ACQUISITION |            |           |        |
| sfrq        | 499.859    | dmm       | c      |
| tn          | H1         | dmf       | 200    |
| at          | 2.732      | temp      | 22.0   |
| PROCESSING  |            |           |        |
| np          | 32768      | lb        | 0.20   |
| sw          | 5997.0     | fn        | 32768  |
| fb          | 3000       | math      | 1      |
| bs          | 4          |           |        |
| pw          | 10.0       | werr      |        |
| pw          | 10.0       | wexp      | wft    |
| tpwr        | 53         | wbs       |        |
| d1          | 8.000      | wnt       |        |
| tof         | 0          | DISPLAY   |        |
| nt          | 8          | sp        | -61.3  |
| cl          | 8          | wp        | 4532.9 |
| alock       | n          | vs        | 50     |
| gain        | not used   | sc        | 0      |
| FLAGS       |            | wc        | 250    |
| il          | n          | hzmm      | 18.37  |
| in          | n          | is        | 257.19 |
| dp          | y          | rfl       | 4132.1 |
| hs          | nn         | rffp      | 3629.0 |
|             |            | th        | 6      |
|             |            | ins       | 1.000  |
|             |            | al        | ph     |

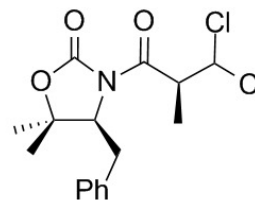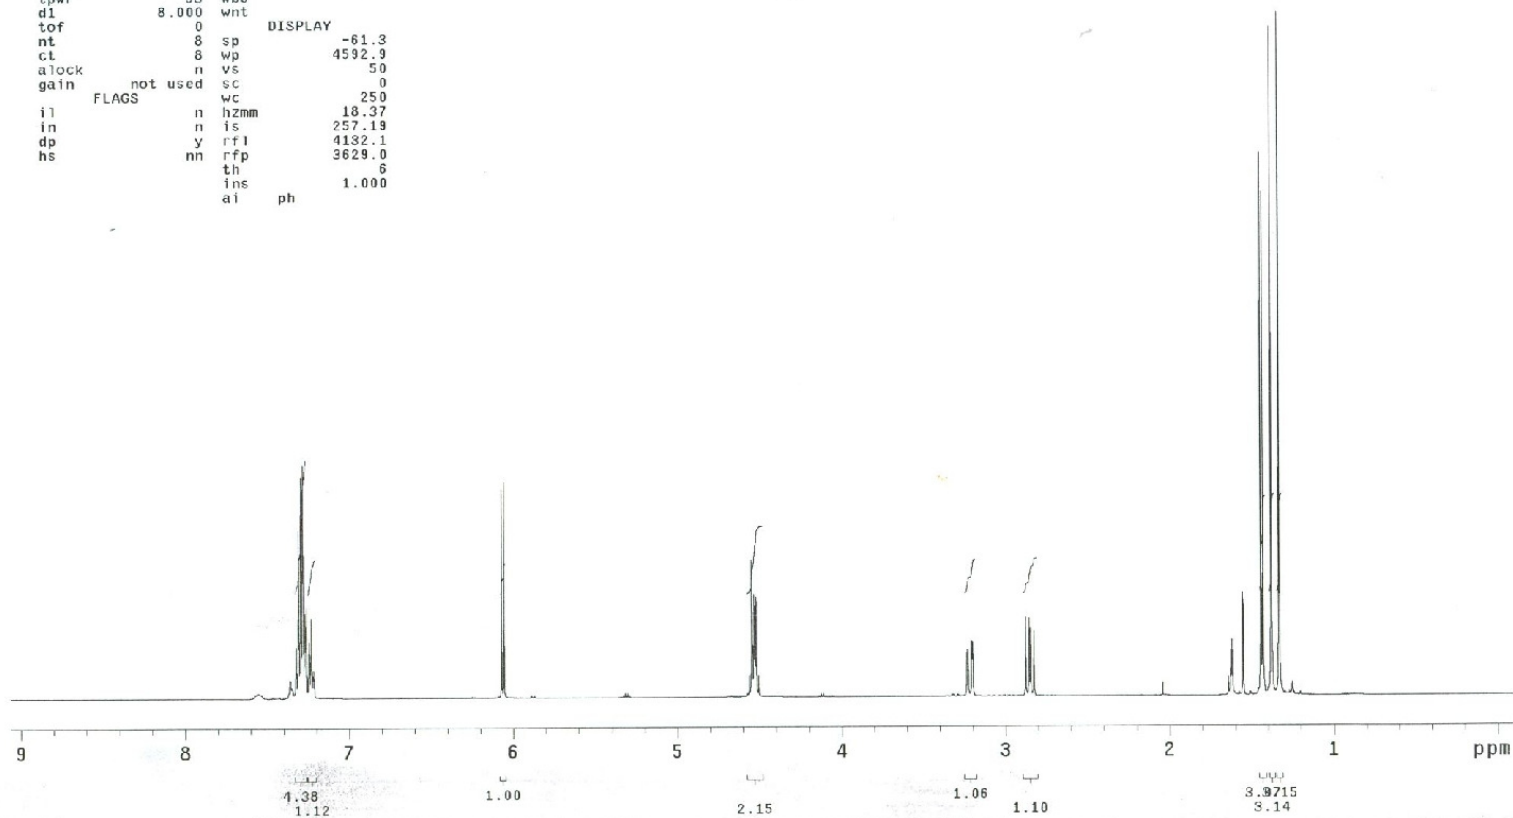

snb-2-009-a-13C

exp1 CARBON

| SAMPLE             |               | SPECIAL    |          |
|--------------------|---------------|------------|----------|
| date               | Sep 7 2009    | temp       | 22.0     |
| solvent            | CDCl3         | gain       | 42       |
| file               | /home/Zakaria | spin       | 20       |
| n/beaumont/snb-2-0 |               | hst        | 0.008    |
| 19-a-13C.500.fid   |               | pw90       | 9.200    |
| ACQUISITION        | alfa          | 10.000     |          |
| sw                 | 36003.6       | FLAGS      |          |
| at                 | 1.300         | il         | n        |
| np                 | 93644         | in         | n        |
| fb                 | 20000         | dp         | y        |
| bs                 | 4             | hs         | nn       |
| d1                 | 1.000         | PROCESSING |          |
| nt                 | 128           | lb         | 0.50     |
| ct                 | 48            | fn         | not used |
| TRANSMITTER        | C13           | DISPLAY    |          |
| tn                 | C13           | sp         | -288.9   |
| sfrq               | 125.702       | wp         | 25728.7  |
| tof                | 865.4         | rfl        | 14909.4  |
| tpwr               | 56            | rfp        | 9707.0   |
| pw                 | 9.200         | rp         | -60.8    |
| DECOUPLER          | H1            | lp         | -244.2   |
| dn                 | H1            | PLOT       |          |
| dof                | 0             | wc         | 250      |
| dm                 | nyy           | sc         | 0        |
| decwave            | 36            | vs         | 2177     |
| dpwr               | 10104         | th         | 9        |
| dmf                |               | ai         | cdc ph   |

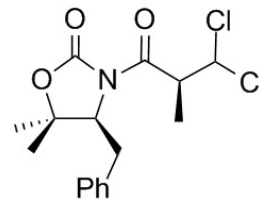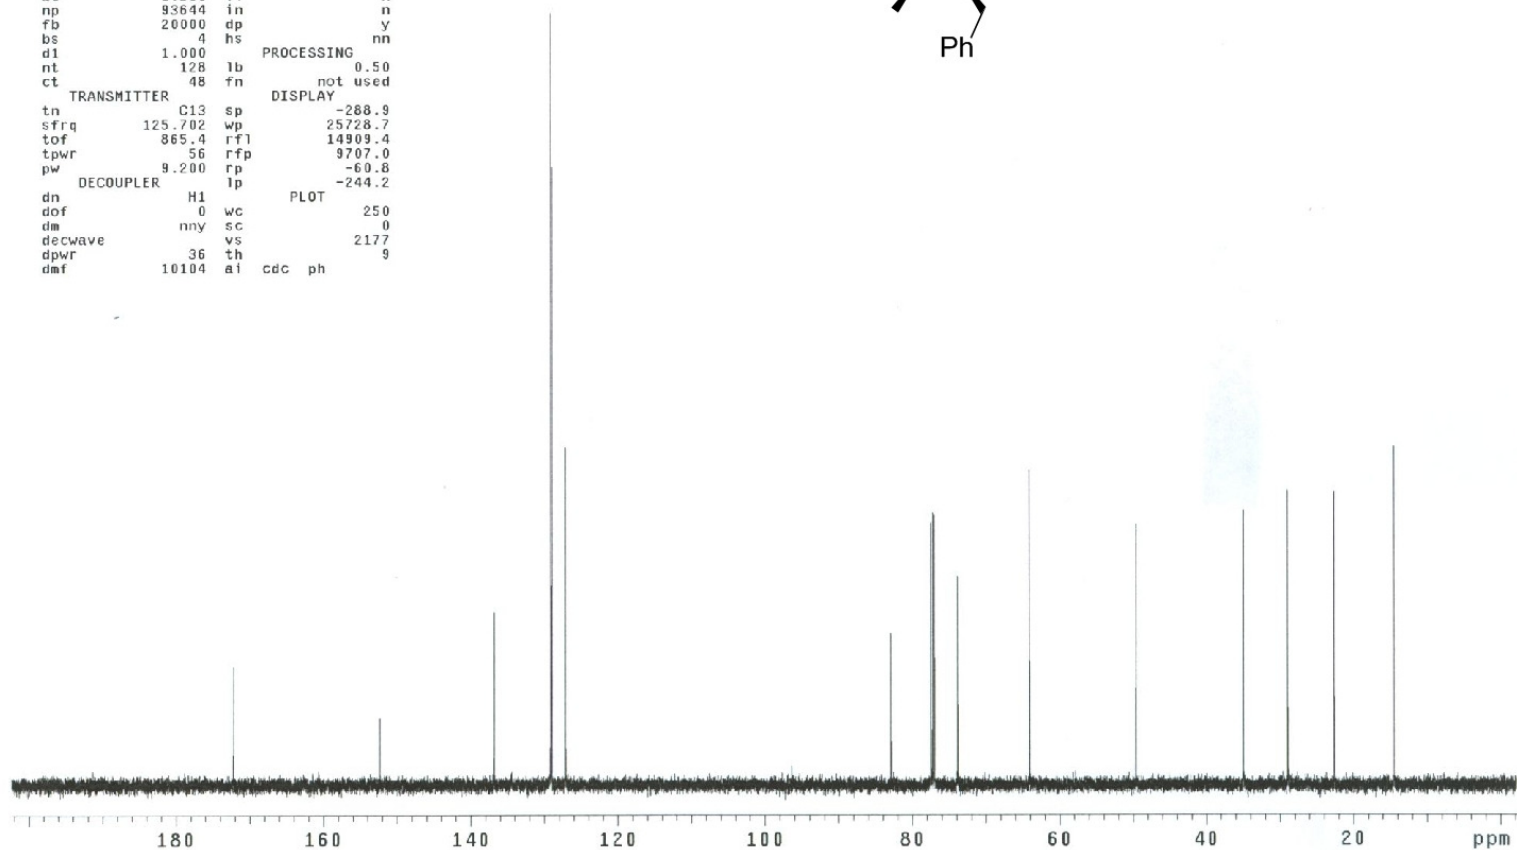

```

snb-2-041-a
exp1 s2pu1
SAMPLE
date Sep 19 2009 dn F19
solvent cdcl3 dof 0
file exp dm nnn
ACQUISITION dmm c
sfrq 499.859 dmf 200
tn H1 temp 22.0
at 2.732 PROCESSING
np 32768 lb 0.20
sw 5997.0 fn 32768
fb 3000 math i
bs 4
pw 10.0 werr
pw 10.0 wexp wft
tpwr 53 wbs
d1 4.000 wnt
DISPLAY
nt 8 sp -69.0
ct 8 wp 4587.8
alock n vs 56
gain not used sc 0
FLAGS wc 250
il n hzmm 18.35
in n ic 133.32
dp y rfl 4139.8
hs nn rfp 3629.0
ins 4
ai ph 1.000

```

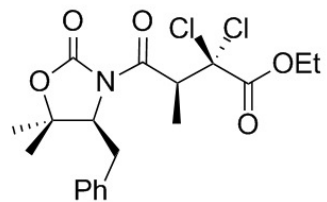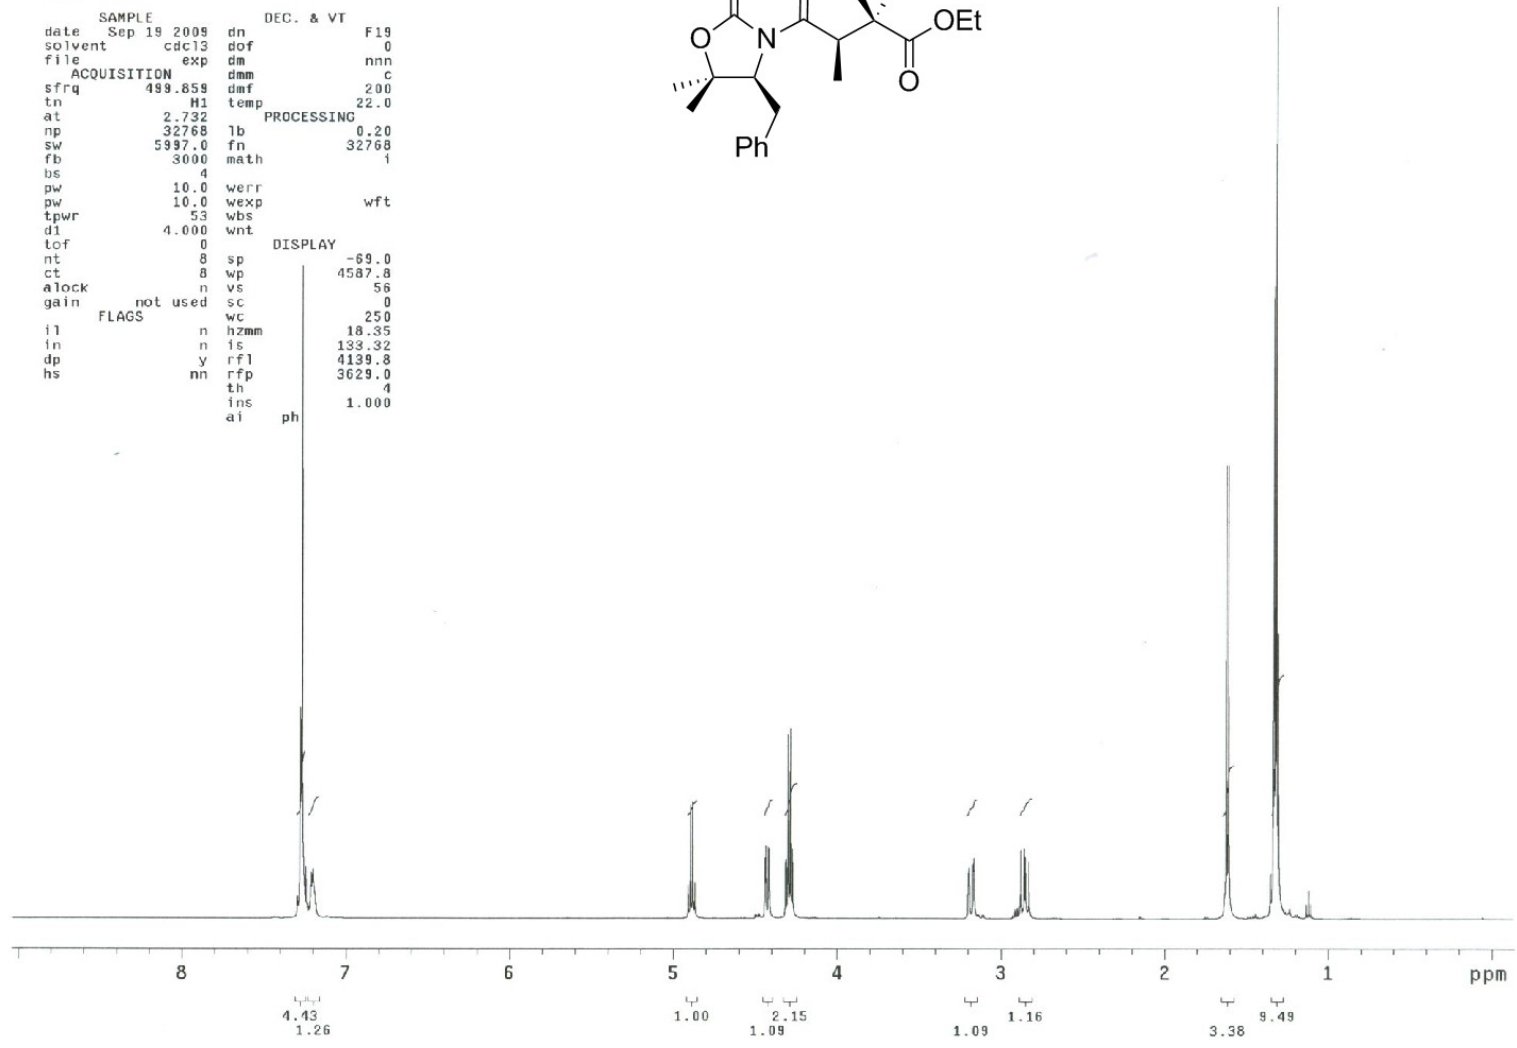

snb-2-034-a-13C

exp1 CARBON

| SAMPLE           |                | SPECIAL    |          |
|------------------|----------------|------------|----------|
| date             | Sep 16 2009    | temp       | 22.0     |
| solvent          | CDCl3          | gain       | 42       |
| file             | /home/Zakaria~ | spin       | 20       |
| n/beamont        | /snb-2-0~      | hst        | 0.008    |
| 41-a-13C.500.fid |                | pw90       | 9.200    |
| ACQUISITION      |                | alfa       | 10.000   |
| sw               | 36003.6        | FLAGS      |          |
| at               | 1.300          | il         | n        |
| np               | 93644          | in         | n        |
| fb               | 20000          | dp         | y        |
| bs               | 4              | hs         | nn       |
| d1               | 1.000          | PROCESSING |          |
| nt               | 128            | lb         | 0.50     |
| ct               | 68             | fn         | not used |
| TRANSMITTER      | C13            | DISPLAY    | -469.6   |
| tn               |                | sp         | 26116.0  |
| sfrq             | 125.702        | wp         | 14911.6  |
| tof              | 865.4          | rfl        | 9707.0   |
| tpwr             | 56             | rp         | -178.7   |
| pw               | 9.200          | lp         | -271.1   |
| DECOUPLER        | H1             | PLOT       |          |
| dn               |                | wc         | 250      |
| dof              | 0              | sc         | 0        |
| dm               | nyy            | vs         | 5474     |
| decwave          |                | th         |          |
| dpwr             | 36             | tl         |          |
| dmf              | 10104          | al         | cdc ph   |

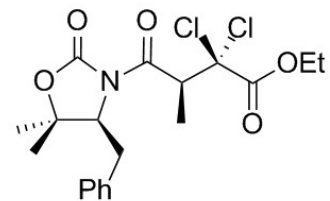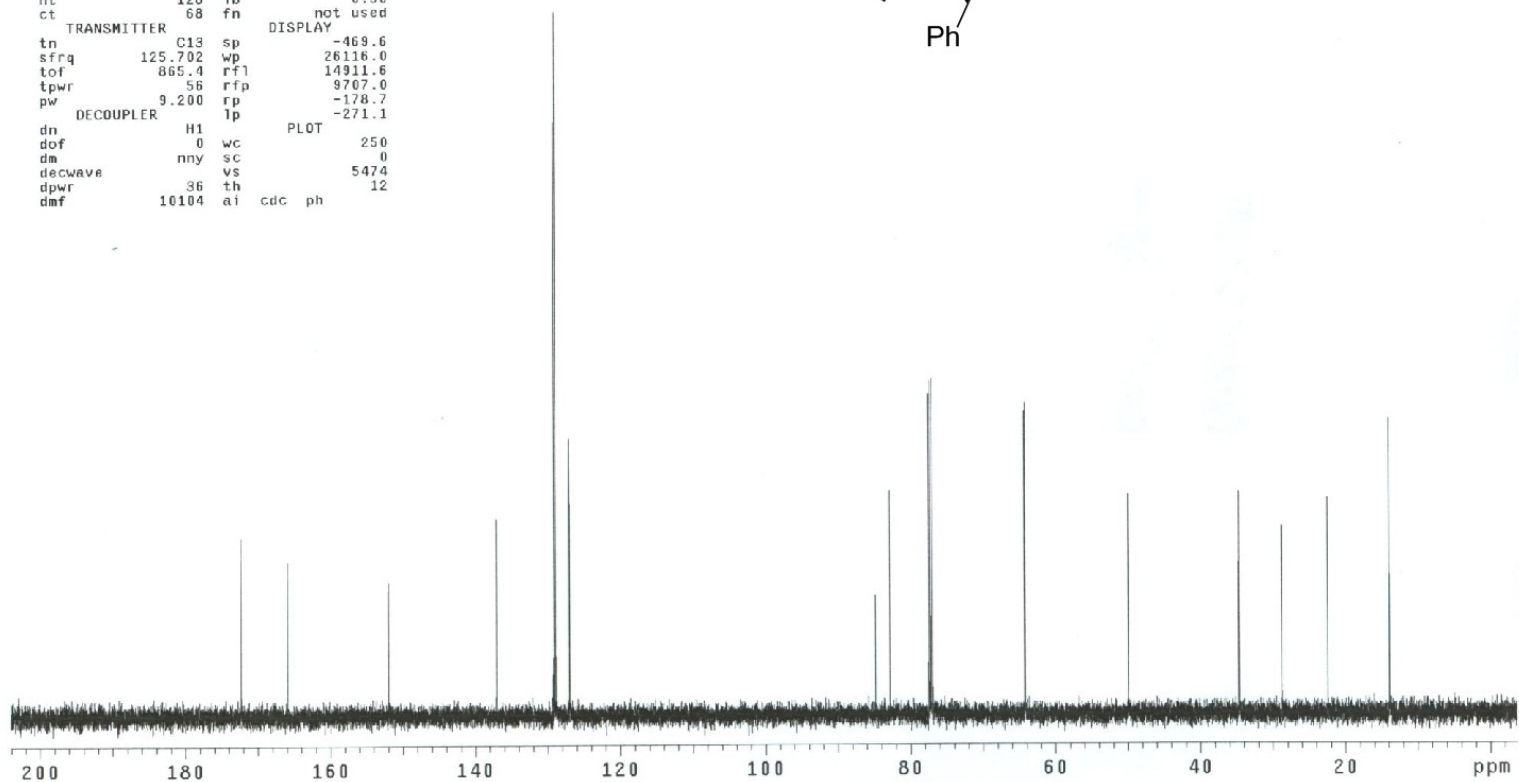



snb-2-084-a  
exp1 s2pu1

| SAMPLE      |             | DEC. & VT  |        |
|-------------|-------------|------------|--------|
| date        | Oct 19 2009 | dn         | F19    |
| solvent     | cdcl3       | dof        | 0      |
| file        | exp         | dm         | nmn    |
| ACQUISITION |             | dmm        | c      |
| sfrq        | 499.859     | dmf        | 200    |
| tn          | H1          | temp       | 22.0   |
| at          | 2.732       | PROCESSING |        |
| np          | 32768       | lb         | 0.20   |
| sw          | 5997.0      | fn         | 32768  |
| fb          | 3000        | math       | i      |
| bs          | 4           |            |        |
| pw          | 10.0        | werr       |        |
| pw          | 10.0        | wexp       | wft    |
| tpwr        | 53          | wbs        |        |
| d1          | 4.000       | wnt        |        |
| tof         | 0           | DISPLAY    |        |
| nt          | 8           | sp         | -41.9  |
| ct          | 8           | wp         | 4592.9 |
| alock       | n           | vs         | 77     |
| gain        | not used    | sc         | 0      |
| FLAGS       |             | wc         | 250    |
| il          | n           | hzmm       | 18.37  |
| in          | n           | fs         | 195.57 |
| dp          | y           | rfl        | 4132.5 |
| hs          | mn          | rffp       | 3629.0 |
|             |             | th         | 13     |
|             |             | ins        | 1.000  |
|             |             | ai         | ph     |

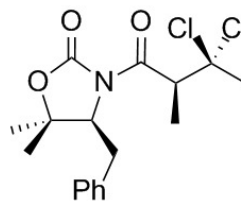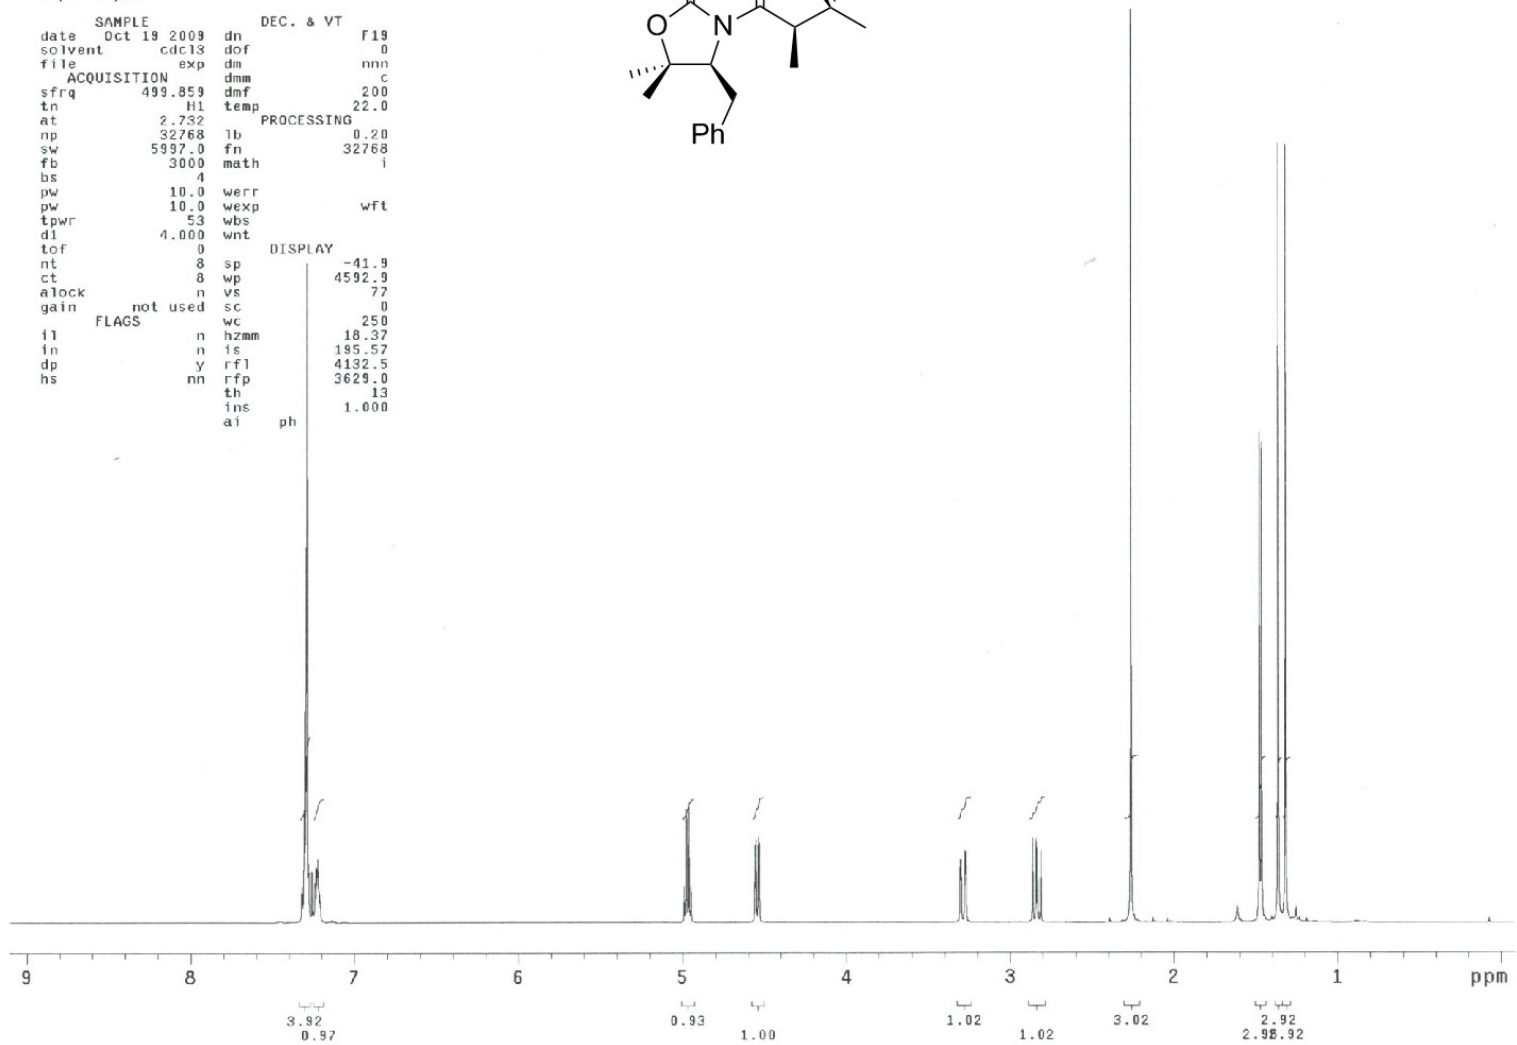

snb-2-078-a-13C

exp1 CARBON

| SAMPLE      |               | SPECIAL    |          |
|-------------|---------------|------------|----------|
| date        | Oct 19 2009   | temp       | 22.0     |
| solvent     | CDCl3         | gain       | 42       |
| file        | /home/Zakaria | spin       | 20       |
| n/beamont   | snb-2-0       | hst        | 0.008    |
| 84-a-13C    | 500.fid       | pw90       | 9.200    |
| ACQUISITION |               | alfa       | 10.000   |
| sw          | 36003.6       | FLAGS      |          |
| at          | 1.300         | il         | n        |
| np          | 93644         | in         | n        |
| fb          | 20000         | dp         | y        |
| bs          | 4             | hs         | nn       |
| di          | 1.000         | PROCESSING |          |
| nt          | 128           | lb         | 0.50     |
| ct          | 56            | fn         | not used |
| TRANSMITTER |               | DISPLAY    |          |
| tn          | C13           | sp         | -229.0   |
| sfrq        | 125.702       | wp         | 25669.4  |
| tof         | 865.4         | rfl        | 14909.4  |
| tpwr        | 56            | rfp        | 9707.0   |
| pw          | 9.200         | rp         | -37.3    |
| DECOUPLER   |               | lp         | -275.0   |
| dn          | H1            | PLOT       |          |
| dof         | 0             | wc         | 250      |
| dm          | nn            | sc         | 0        |
| decwave     |               | vs         | 2026     |
| dpwr        | 36            | th         | 5        |
| dmf         | 10104         | ai         | cdc ph   |

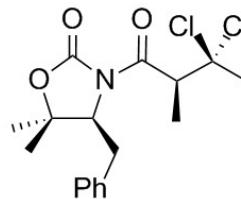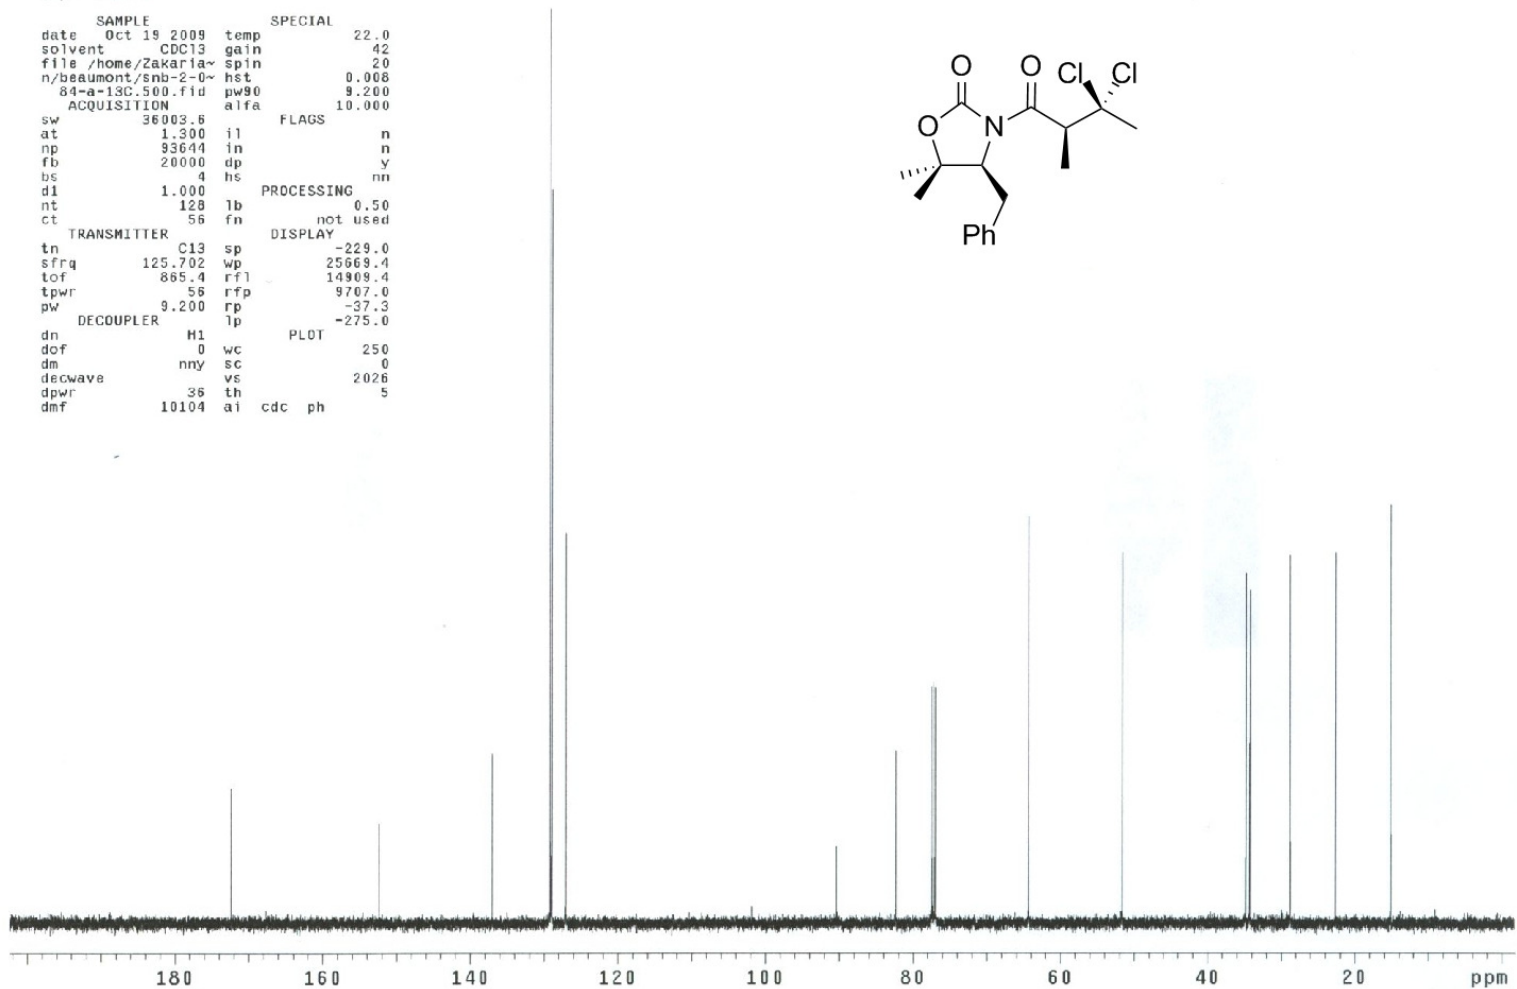

```

snb-2-046-a
exp1 s2pu1
SAMPLE
date Sep 22 2009 dn F19
solvent cdc13 dof 0
file exp dm nnn
ACQUISITION dmm c
sfrq 499.859 dmf 200
in H1 temp 22.0
at 2.732 PROCESSING
np 32768 lb 0.20
sw 5997.0 fn 32768
fb 3000 math i
bs 4
pw 10.0 werr
pw 10.0 wexp wft
tpwr 53 wbs
d1 1.000 wnt
tof 0 DISPLAY
nt 8 sp -39.4
ct 8 wp 4235.7
alock n vs 61
gain not used sc 0
FLAGS wc 250
il n hzmm 16.94
in n fs 133.32
dp y rfl 4129.9
hs nn rfp 3629.0
th 13
ins 1.000
al ph

```

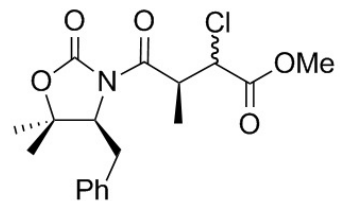

**Diastereoisomer 1**

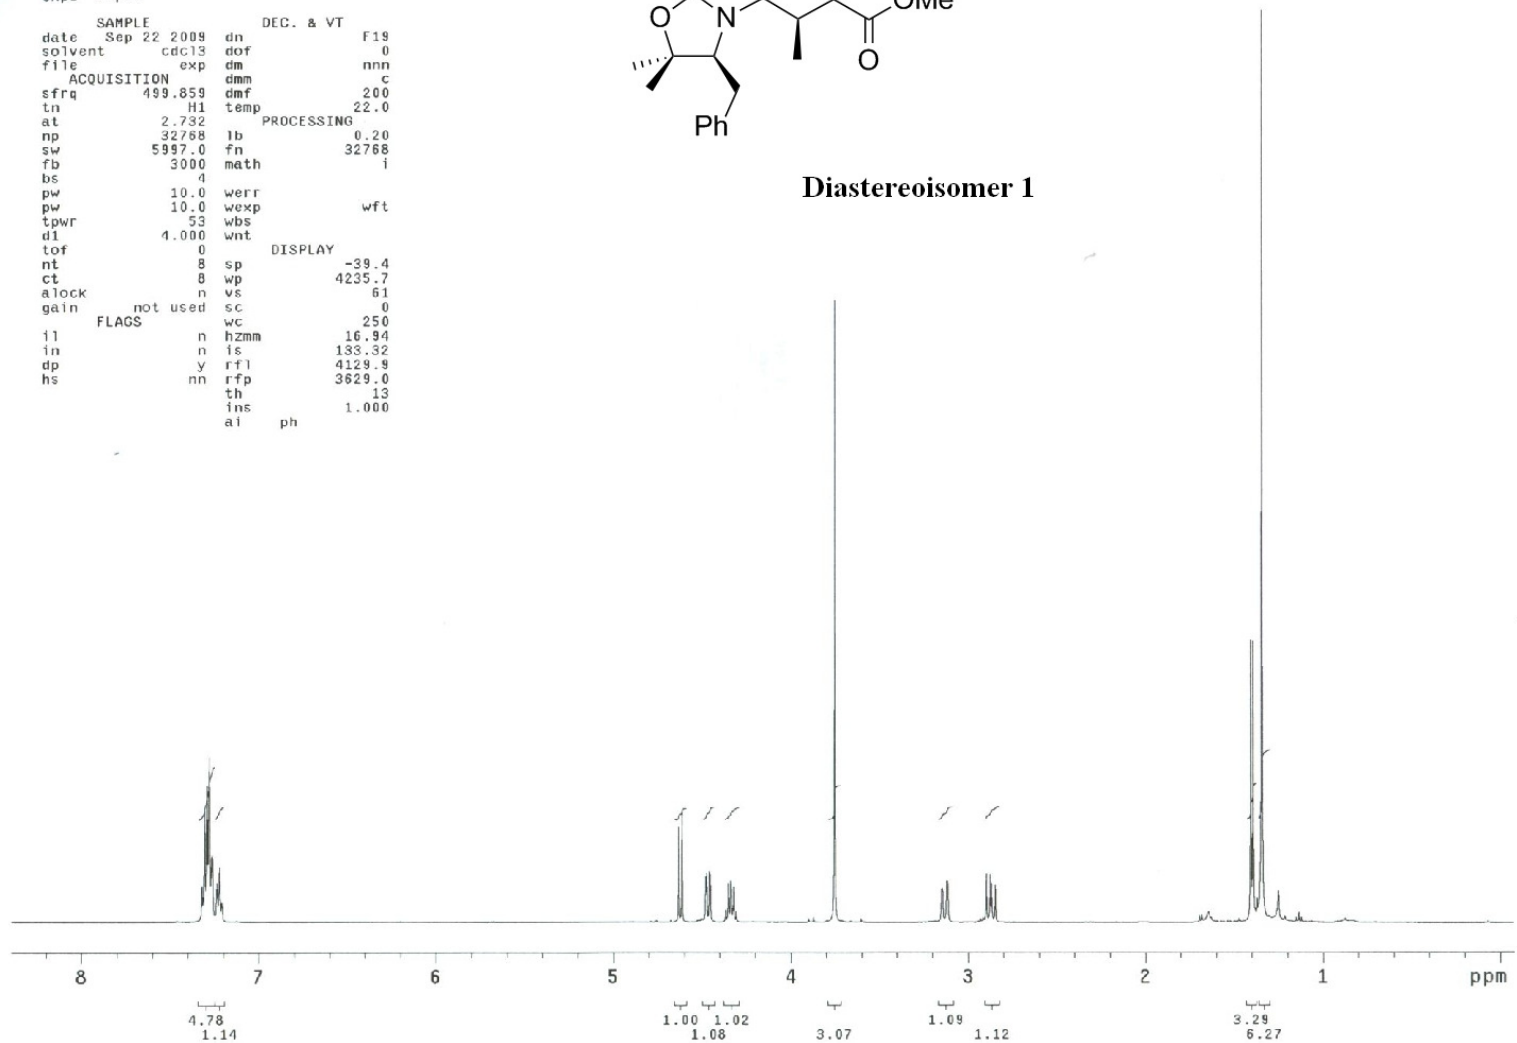

snb-2-046-a-13C

exp1 CARBON

| SAMPLE             |               | SPECIAL    |          |
|--------------------|---------------|------------|----------|
| date               | Sep 22 2009   | temp       | 22.0     |
| solvent            | CDCl3         | gain       | 42       |
| file               | /home/Zakaria | spin       | 20       |
| n/beaumont/snb-2-0 |               | hst        | 0.008    |
| 46-a-13C.500.fid   |               | pw90       | 9.200    |
| ACQUISITION        | alpha         | alpha      | 10.000   |
| sw                 | 36003.6       | FLAGS      |          |
| at                 | 1.300         | il         | n        |
| np                 | 93644         | in         | n        |
| fb                 | 20000         | dp         | y        |
| bs                 | 4             | hs         | nn       |
| d1                 | 1.000         | PROCESSING |          |
| nt                 | 400           | lb         | 0.50     |
| ct                 | 84            | fn         | not used |
| TRANSMITTER        |               | DISPLAY    |          |
| tn                 | C13           | sp         | -229.5   |
| sfrq               | 125.702       | wp         | 25579.8  |
| tof                | 865.4         | rfl        | 14909.9  |
| tpwr               | 56            | rfp        | 9707.0   |
| pw                 | 9.200         | rp         | -22.1    |
| DECOUPLER          |               | lp         | -296.9   |
| dn                 | H1            | PLOT       |          |
| dof                | 0             | wc         | 250      |
| dm                 | nny           | sc         | 0        |
| decwave            |               | vs         | 2355     |
| dpr                | 36            | th         | 12       |
| dmf                | 10104         | ai         | cdc ph   |

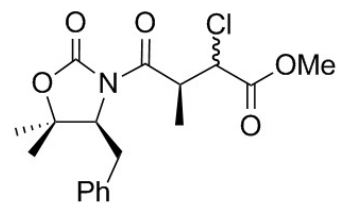

Diastereoisomer 1

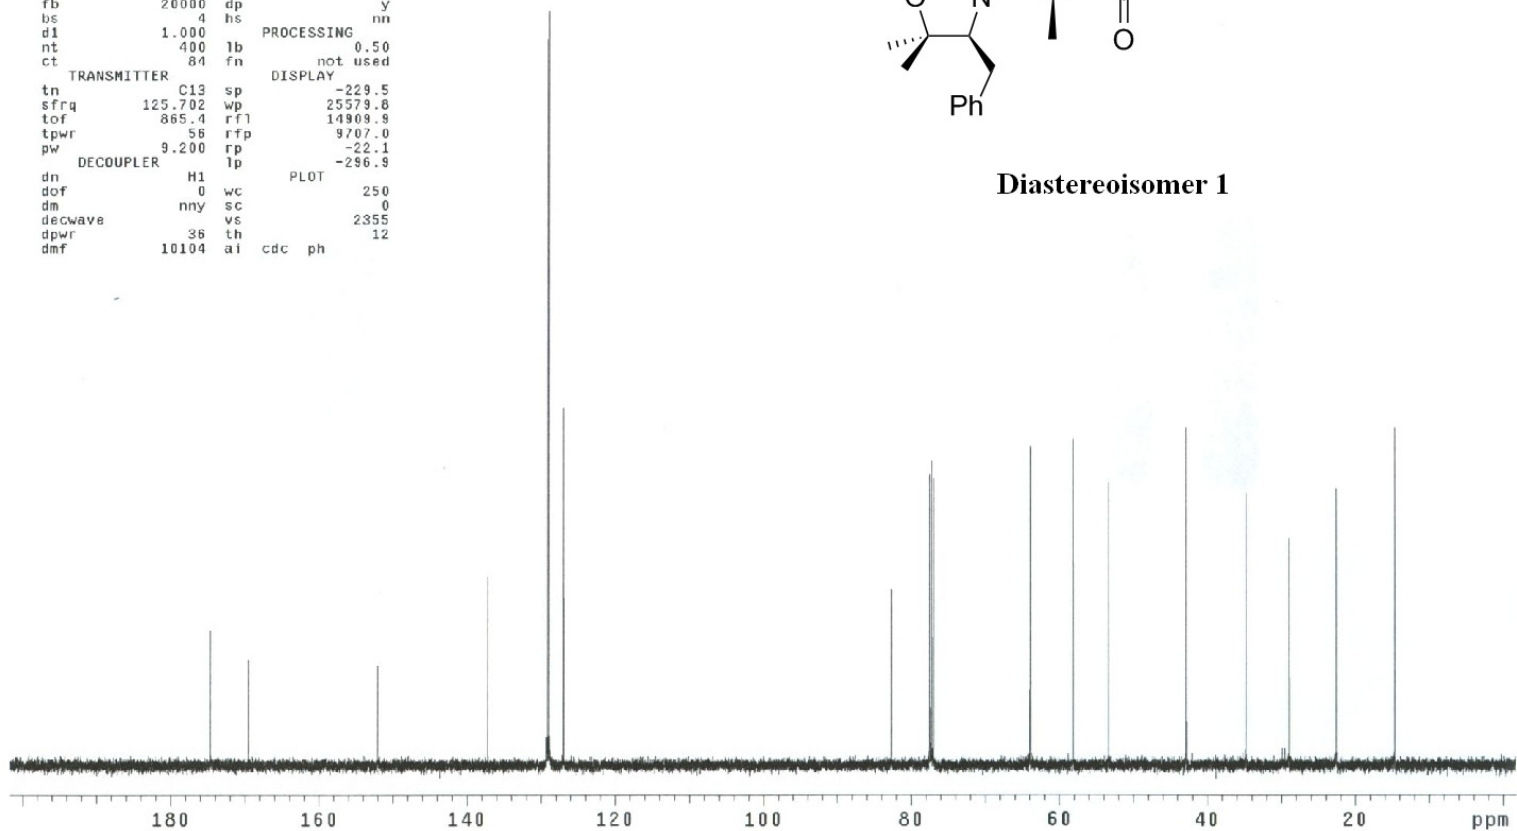

```

snb-2-046-b
exp1 s2pu1
SAMPLE          DEC. & VT
data Sep 20 2009 dn          F19
solvent cdc13  dof          0
file      exp  dm          nnn
ACQUISITION    dmm          C
sfrq 499.859  dmf          200
tn      H1    temp        22.0
at 2.732     PROCESSING
np 32768     lb          0.20
sw 5997.0   fn          32768
fb 3000     math         i
bs 4
pw 10.0     werr
pw 10.0     wexp          wft
tpwr 53     wbs
d1 4.000   wnt
tof 0
nt 8       sp          -46.3
ct 8       wp          4037.3
alock n     vs          81
gain not used sc          0
FLAGS      wc          250
il n       hzmm        16.15
in n       is          133.32
dp y       rfl         4131.7
hs nn      rfp         3629.0
                ch          13
                ins         1.000
                ai          ph

```

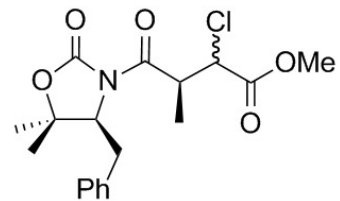

**Diastereoisomer 2**

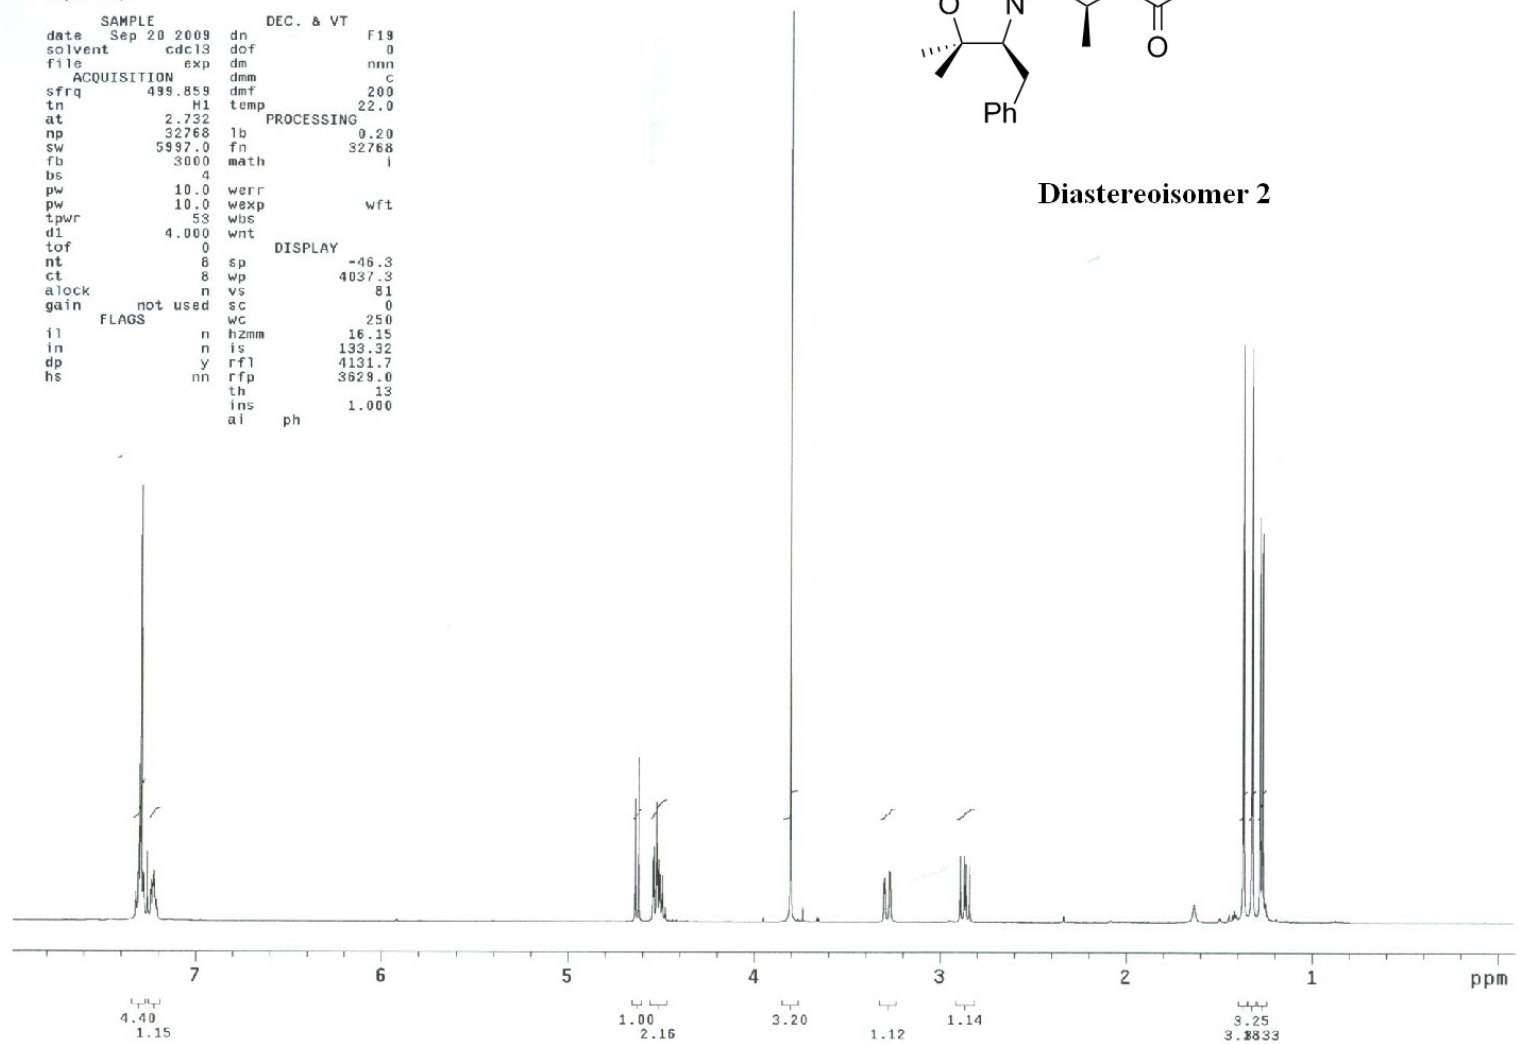

snb-2-046-b-13C

exp1 CARBON

| SAMPLE             |                | SPECIAL    |          |
|--------------------|----------------|------------|----------|
| date               | Sep 20 2009    | temp       | 22.0     |
| solvent            | CDCl3          | gain       | 42       |
| file               | /home/Zakaria- | spin       | 20       |
| n/beamont/snb-2-0- |                | hst        | 0.008    |
| 46-b-13C.500.fid   |                | pw90       | 9.200    |
| ACQUISITION        |                | alfa       | 10.000   |
| sw                 | 36003.6        | FLAGS      |          |
| at                 | 1.300          | il         | n        |
| np                 | 93644          | in         | n        |
| fb                 | 20000          | dp         | y        |
| bs                 | 4              | hs         | nn       |
| d1                 | 1.000          | PROCESSING |          |
| nt                 | 456            | lb         | 0.50     |
| ct                 | 58             | fn         | not used |
| TRANSMITTER        |                | DISPLAY    |          |
| tn                 | C13            | sp         | -168.5   |
| sfrq               | 125.702        | wp         | 25520.5  |
| tof                | 865.4          | rf1        | 14908.3  |
| tpwr               | 56             | rfp        | 9707.0   |
| pw                 | 9.200          | rp         | -41.8    |
| DECOUPLER          |                | lp         | -293.5   |
| dn                 | H1             | PLOT       |          |
| dof                | 0              | wc         | 250      |
| dm                 | nyy            | sc         | 0        |
| decwave            |                | vs         | 2568     |
| dpwr               | 36             | th         |          |
| dmf                | 10104          | ai         | cdc ph   |

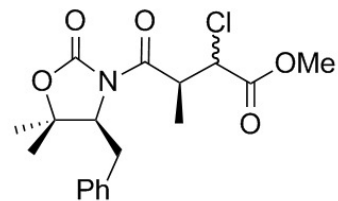

Diastereoisomer 2

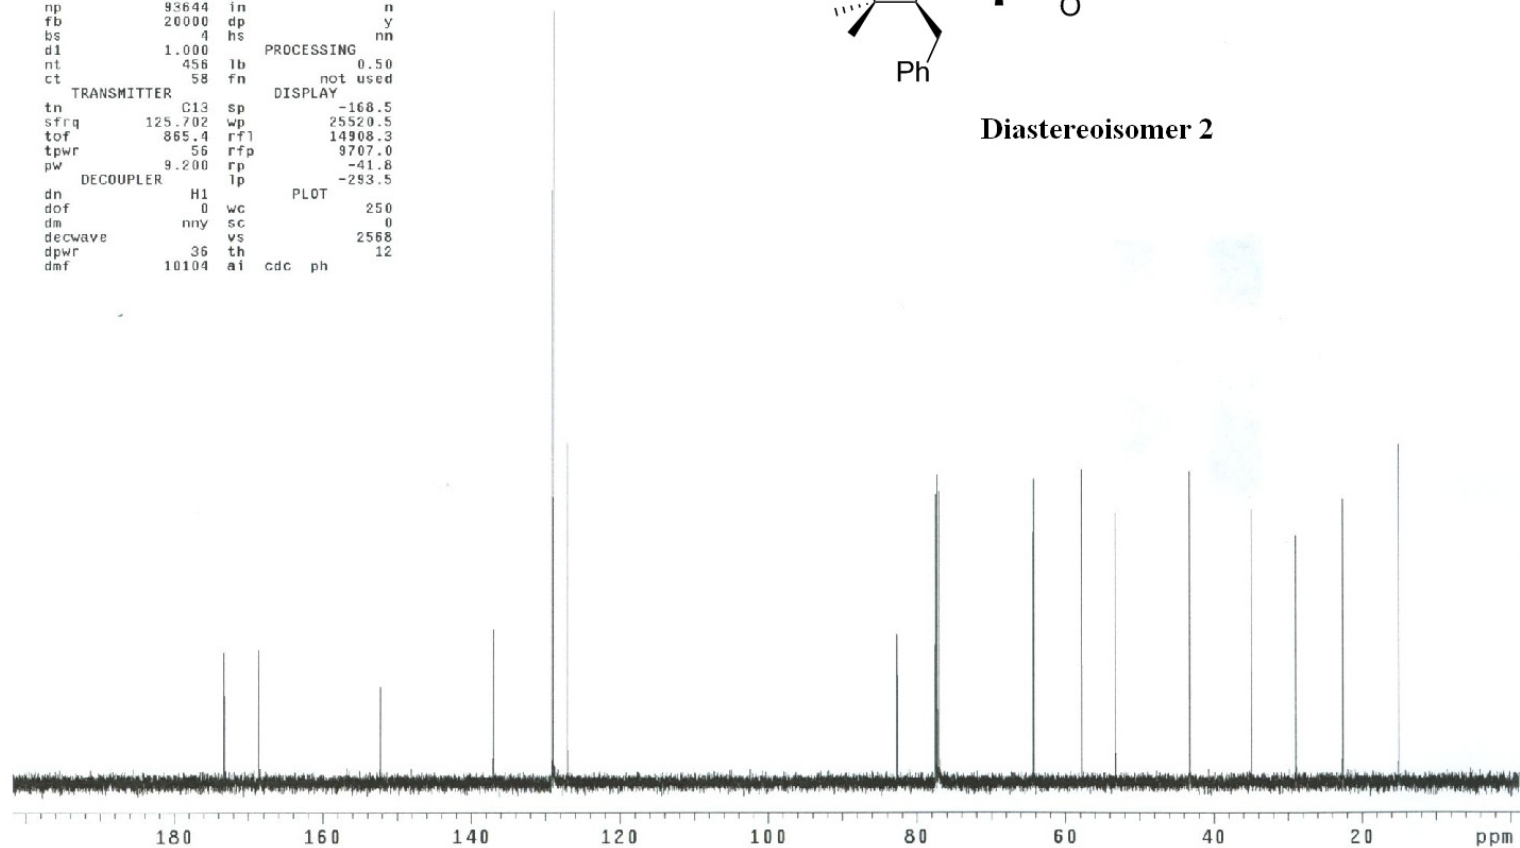

snb-2-050-a

exp1 s2pu1

| SAMPLE      |             | DEC. & VT  |        |
|-------------|-------------|------------|--------|
| date        | Sep 22 2009 | dn         | F19    |
| solvent     | cdcl3       | dof        | 0      |
| file        | exp         | dmm        | nnn    |
| ACQUISITION |             | dmf        | c      |
| sfrq        | 499.859     | dmf        | 200    |
| tn          | H1          | temp       | 22.0   |
| at          | 2.732       | PROCESSING |        |
| np          | 32768       | lb         | 0.20   |
| sw          | 5997.0      | fn         | 32768  |
| fb          | 3000        | math       | 1      |
| bs          | 4           |            |        |
| pw          | 10.0        | werr       |        |
| pw          | 10.0        | wexp       | wft    |
| tpwr        | 53          | wbs        |        |
| d1          | 4.000       | wnt        |        |
| tof         | 0           | DISPLAY    |        |
| nt          | 8           | sp         | -36.4  |
| ct          | 8           | wp         | 4091.8 |
| alock       | n           | vs         | 76     |
| gain        | not used    | sc         | 0      |
| FLAGS       |             | wc         | 250    |
| il          | n           | hzmm       | 16.37  |
| in          | n           | is         | 133.32 |
| dp          | y           | rfl        | 4131.7 |
| hs          | nn          | rfp        | 3629.0 |
|             |             | th         | 13     |
|             |             | ins        | 1.000  |
|             |             | ai         | ph     |

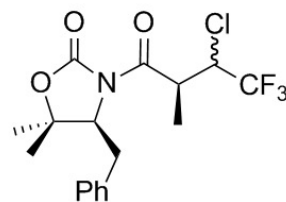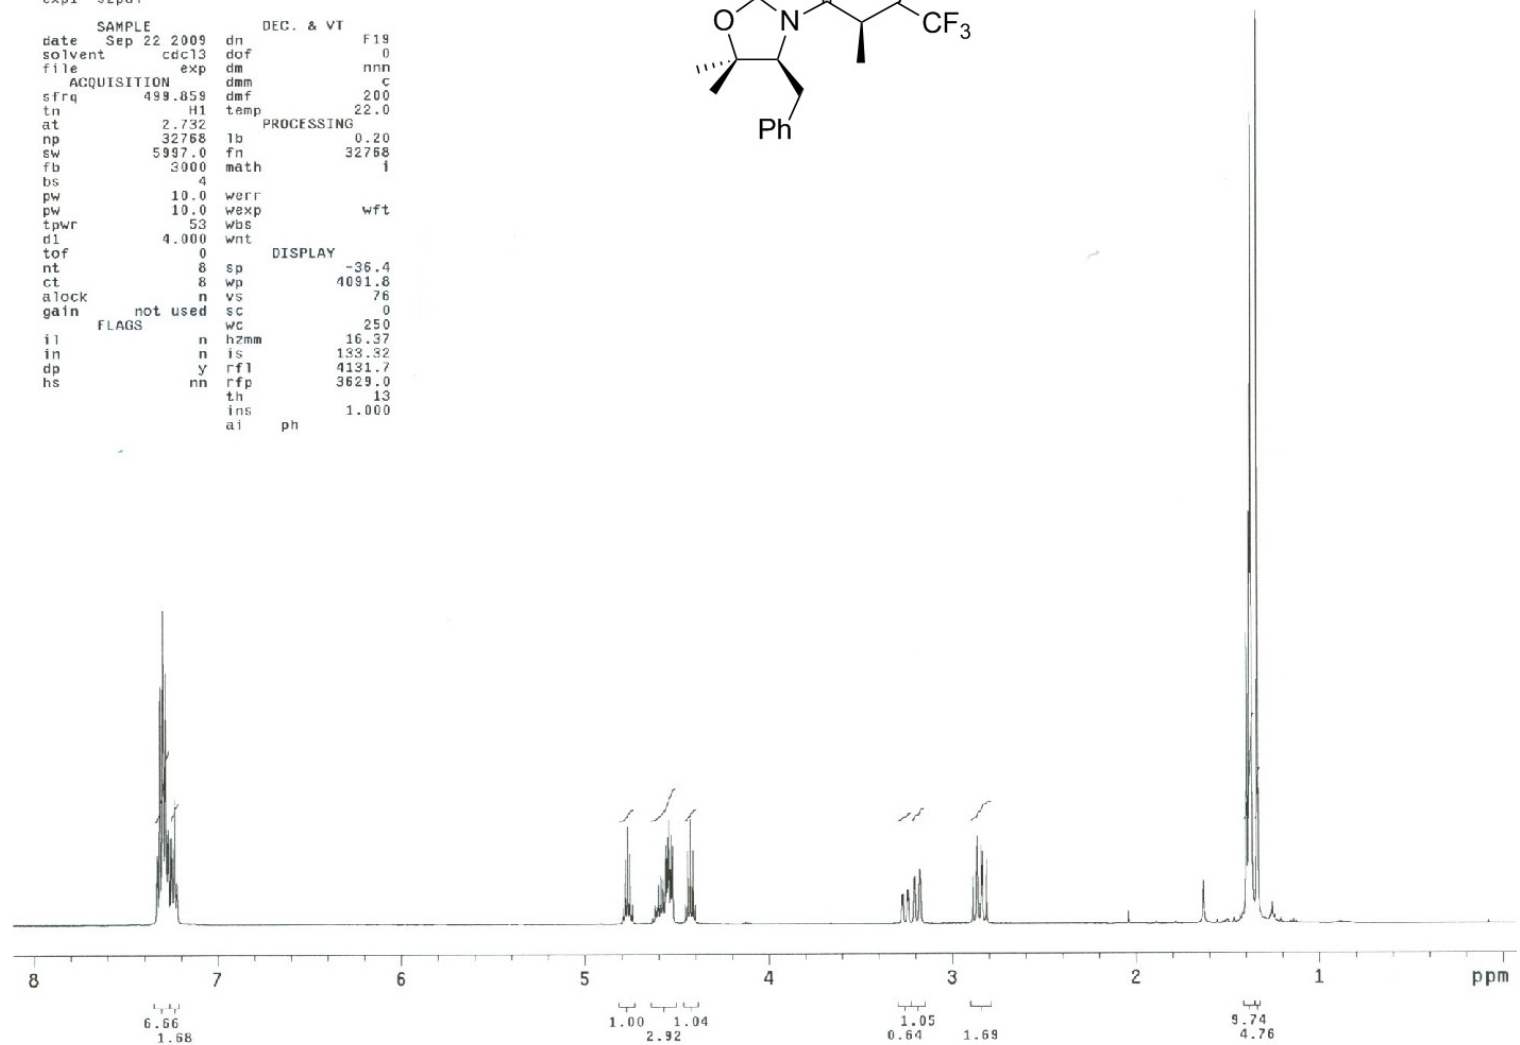

snb-2-050-a-13C

exp1 CARBON

| SAMPLE      |             | SPECIAL    |          |
|-------------|-------------|------------|----------|
| date        | Sep 22 2009 | temp       | 22.0     |
| solvent     | CDC13       | gain       | 42       |
| file        | exp         | spin       | 20       |
| ACQUISITION |             |            |          |
| sw          | 36003.6     | hst        | 0.008    |
| at          | 1.300       | pw90       | 9.200    |
| np          | 93644       | alfa       | 10.000   |
|             |             | FLAGS      |          |
| fb          | 20000       | il         | n        |
| bs          | 4           | in         | n        |
| d1          | 1.000       | dp         | y        |
| nt          | 400         | hs         | nn       |
| ct          | 170         | PROCESSING |          |
| tn          | C13         | lb         | 0.50     |
| sfrq        | 125.702     | fn         | not used |
| tof         | 865.4       | sp         | -227.9   |
| tpwr        | 56          | wp         | 23048.9  |
| pw          | 9.200       | rfl        | 14908.9  |
| DECOUPLER   |             | rfp        | 9707.0   |
| dn          | H1          | rp         | -8.5     |
| dof         | 0           | lp         | -313.5   |
| dm          | nny         | PLOT       |          |
| decwave     |             | wc         | 250      |
| dpwr        | 36          | sc         | 0        |
| dmf         | 10104       | vs         | 2433     |
|             |             | th         | 12       |
|             |             | ai         | cdc ph   |

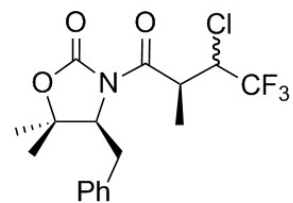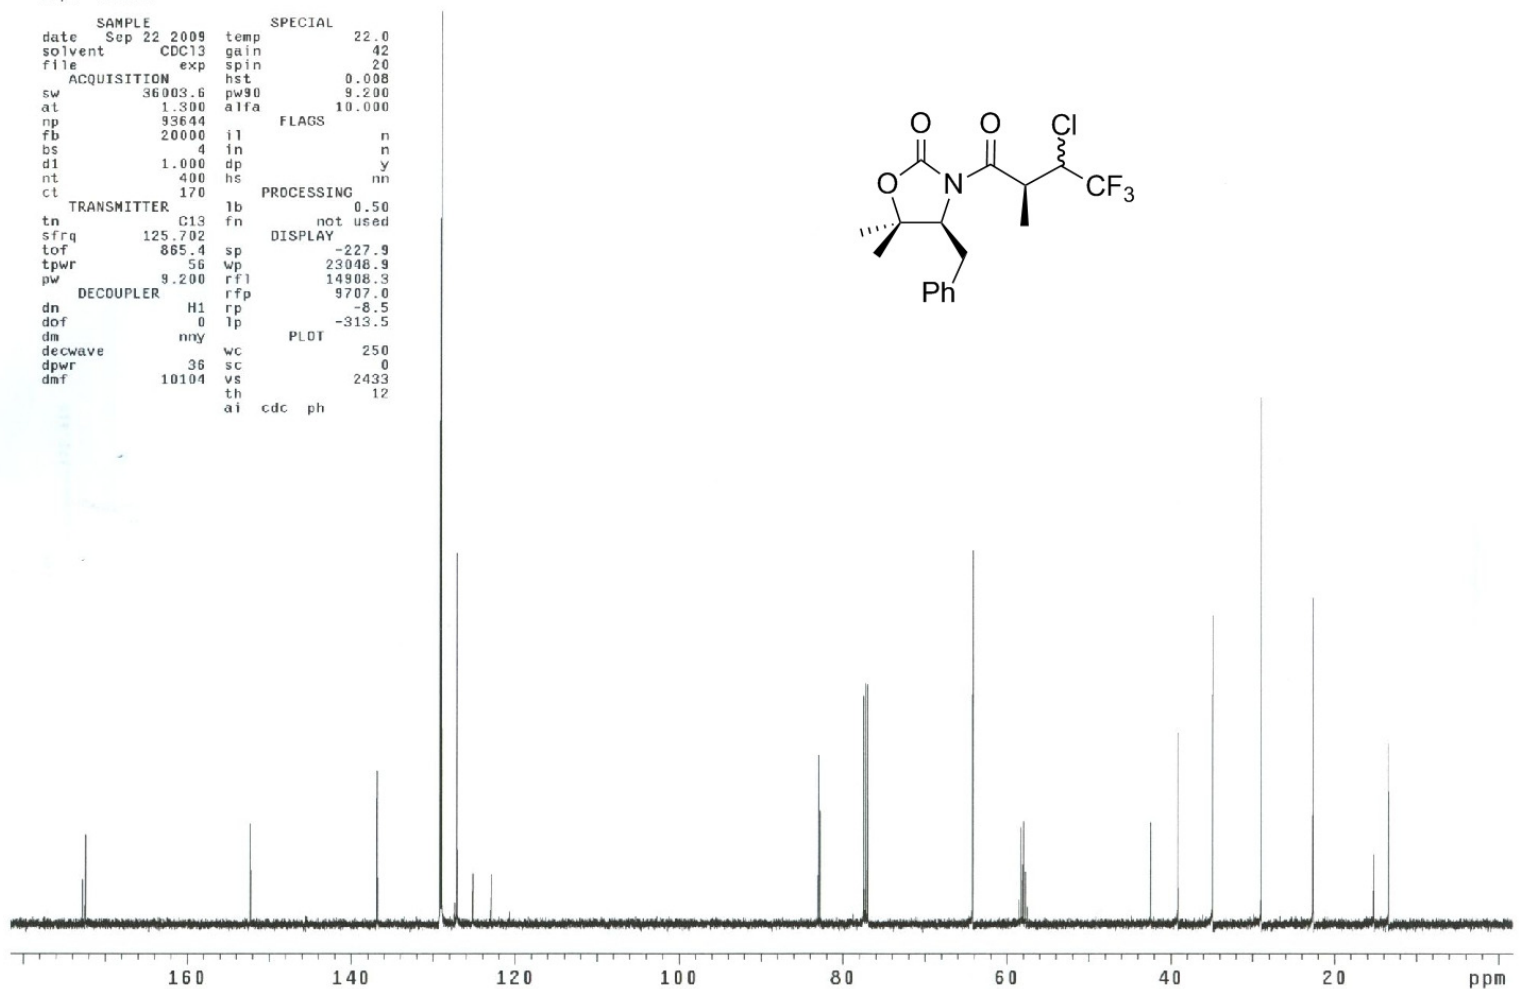



snb-2-095-a

exp1 s2pu1

|             |             |            |        |
|-------------|-------------|------------|--------|
| date        | Oct 28 2009 | dn         | F19    |
| solvent     | cdc13       | dof        | 0      |
| file        | exp         | dm         | nnn    |
| ACQUISITION |             | dmm        | c      |
| sfrq        | 499.859     | dmf        | 200    |
| tn          | H1          | temp       | 22.0   |
| at          | 2.732       | PROCESSING |        |
| np          | 32768       | tb         | 0.20   |
| sw          | 5997.0      | fn         | 32768  |
| fb          | 3000        | math       | i      |
| bs          | 4           |            |        |
| pw          | 10.0        | werr       |        |
| pw          | 10.0        | wexp       | wft    |
| tpwr        | 53          | wbs        |        |
| dl          | 4.000       | wnt        |        |
| tof         | 0           | DISPLAY    |        |
| nt          | 8           | sp         | -56.2  |
| ct          | 8           | wp         | 3997.8 |
| alock       | n           | vs         | 135    |
| gain        | not used    | sc         | 0      |
| FLAGS       |             | wc         | 250    |
| il          | n           | hzmm       | 15.99  |
| in          | n           | is         | 130.11 |
| dp          | y           | rfl        | 4131.7 |
| hs          | nn          | rfp        | 3629.0 |
|             |             | th         | 13     |
|             |             | ins        | 1.000  |
|             |             | ai         | ph     |

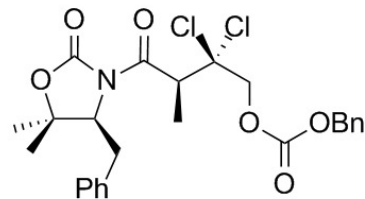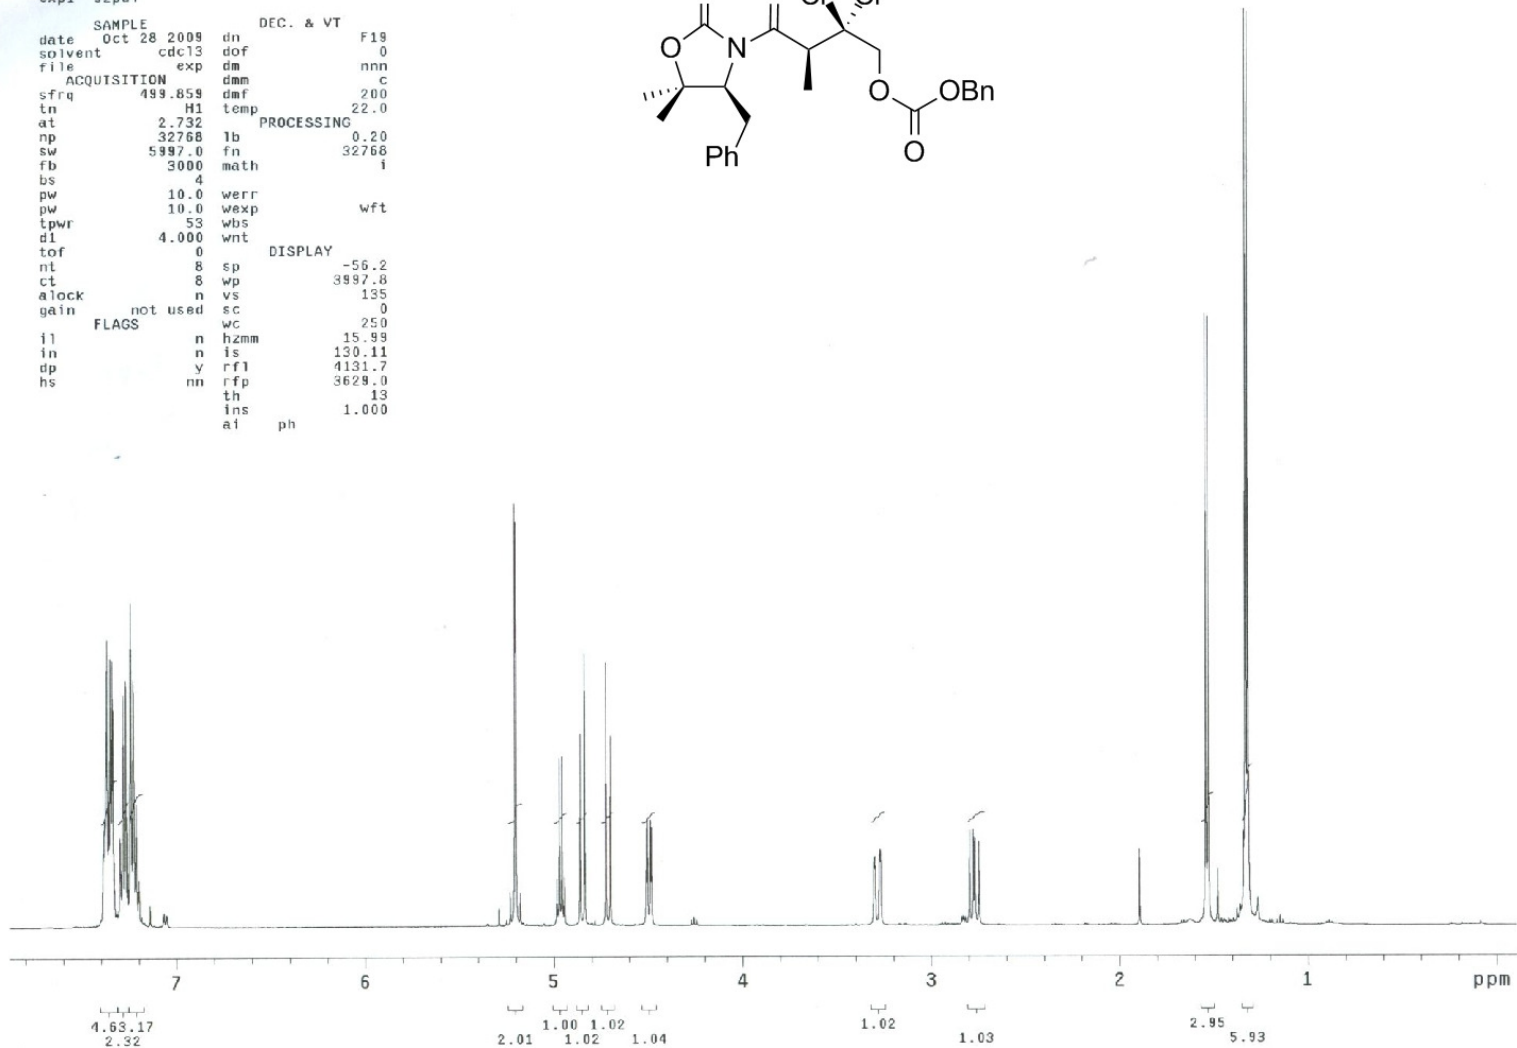

snb-2-095-a-13C

exp1 CARBON

| SAMPLE             |                | SPECIAL    |          |
|--------------------|----------------|------------|----------|
| date               | Oct 28 2009    | temp       | 22.0     |
| solvent            | CDC13          | gain       | 42       |
| file               | /home/Zakaria~ | spin       | 20       |
| n/beamont/snb-2-0~ |                | hst        | 0.008    |
| 95-a-13C.500.fid   |                | pw90       | 9.200    |
| ACQUISITION        |                | alfa       | 10.000   |
| sw                 | 36003.6        | FLAGS      |          |
| at                 | 1.300          | fl         | n        |
| np                 | 93644          | in         | n        |
| fb                 | 20000          | dp         | y        |
| bs                 | 4              | hs         | nn       |
| d1                 | 1.000          | PROCESSING |          |
| nt                 | 128            | lb         | 0.50     |
| ct                 | 57             | fn         | not used |
| TRANSMITTER        |                | DISPLAY    |          |
| tn                 | C13            | sp         | -321.3   |
| sfrq               | 125.702        | wp         | 25907.8  |
| tof                | 865.4          | rfl        | 14912.1  |
| lpwr               | 56             | rfp        | 9707.0   |
| pw                 | 9.200          | rp         | -24.2    |
| DECOUPLER          |                | lp         | -286.1   |
| dn                 | H1             | PLOT       |          |
| dof                | 0              | wc         | 250      |
| dm                 | nny            | sc         | 0        |
| dscwave            |                | vs         | 2122     |
| dpwr               | 36             | th         | 5        |
| dmf                | 10104          | ai         | cdc ph   |

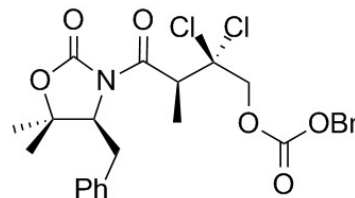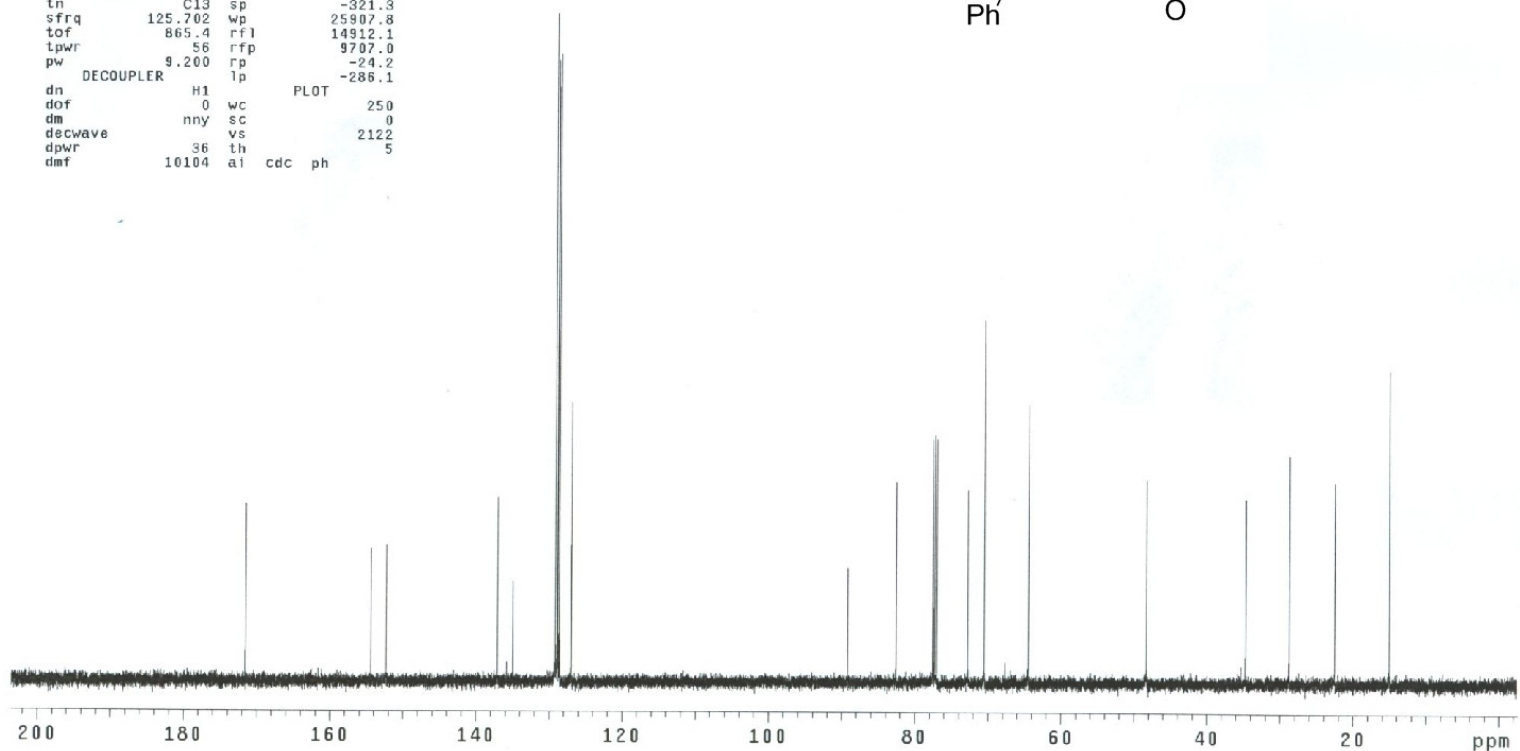

snb-2-017-a

exp1 s2pu1

| SAMPLE      |            | DEC. & VT |        |
|-------------|------------|-----------|--------|
| date        | Nov 6 2009 | dn        | F19    |
| solvent     | cdc13      | dof       | 0      |
| file        | exp        | dm        | nnn    |
| ACQUISITION |            |           |        |
| sfrq        | 499.859    | dmm       | c      |
| tn          | H1         | dmf       | 200    |
| at          | 2.732      | temp      | 22.0   |
| PROCESSING  |            |           |        |
| np          | 32768      | lb        | 0.20   |
| sw          | 5997.0     | fn        | 32768  |
| fb          | 3000       | math      | 1      |
| bs          | 4          |           |        |
| pw          | 10.0       | werr      |        |
| pw          | 10.0       | wexp      | wft    |
| tpwr        | 53         | wbs       |        |
| d1          | 4.000      | wnt       |        |
| tof         | 0          | DISPLAY   |        |
| nt          | 4          | sp        | -26.2  |
| ct          | 4          | wp        | 4066.9 |
| alock       | n          | vs        | 32     |
| gain        | not used   | sc        | 0      |
| FLAGS       |            | wc        | 250    |
| il          | n          | hzmm      | 16.27  |
| in          | n          | is        | 137.07 |
| dp          | y          | rfl       | 4131.4 |
| hs          | nn         | rfp       | 3629.0 |
|             |            | th        | 6      |
|             |            | ins       | 1.000  |
|             |            | ai        | ph     |

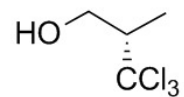

7

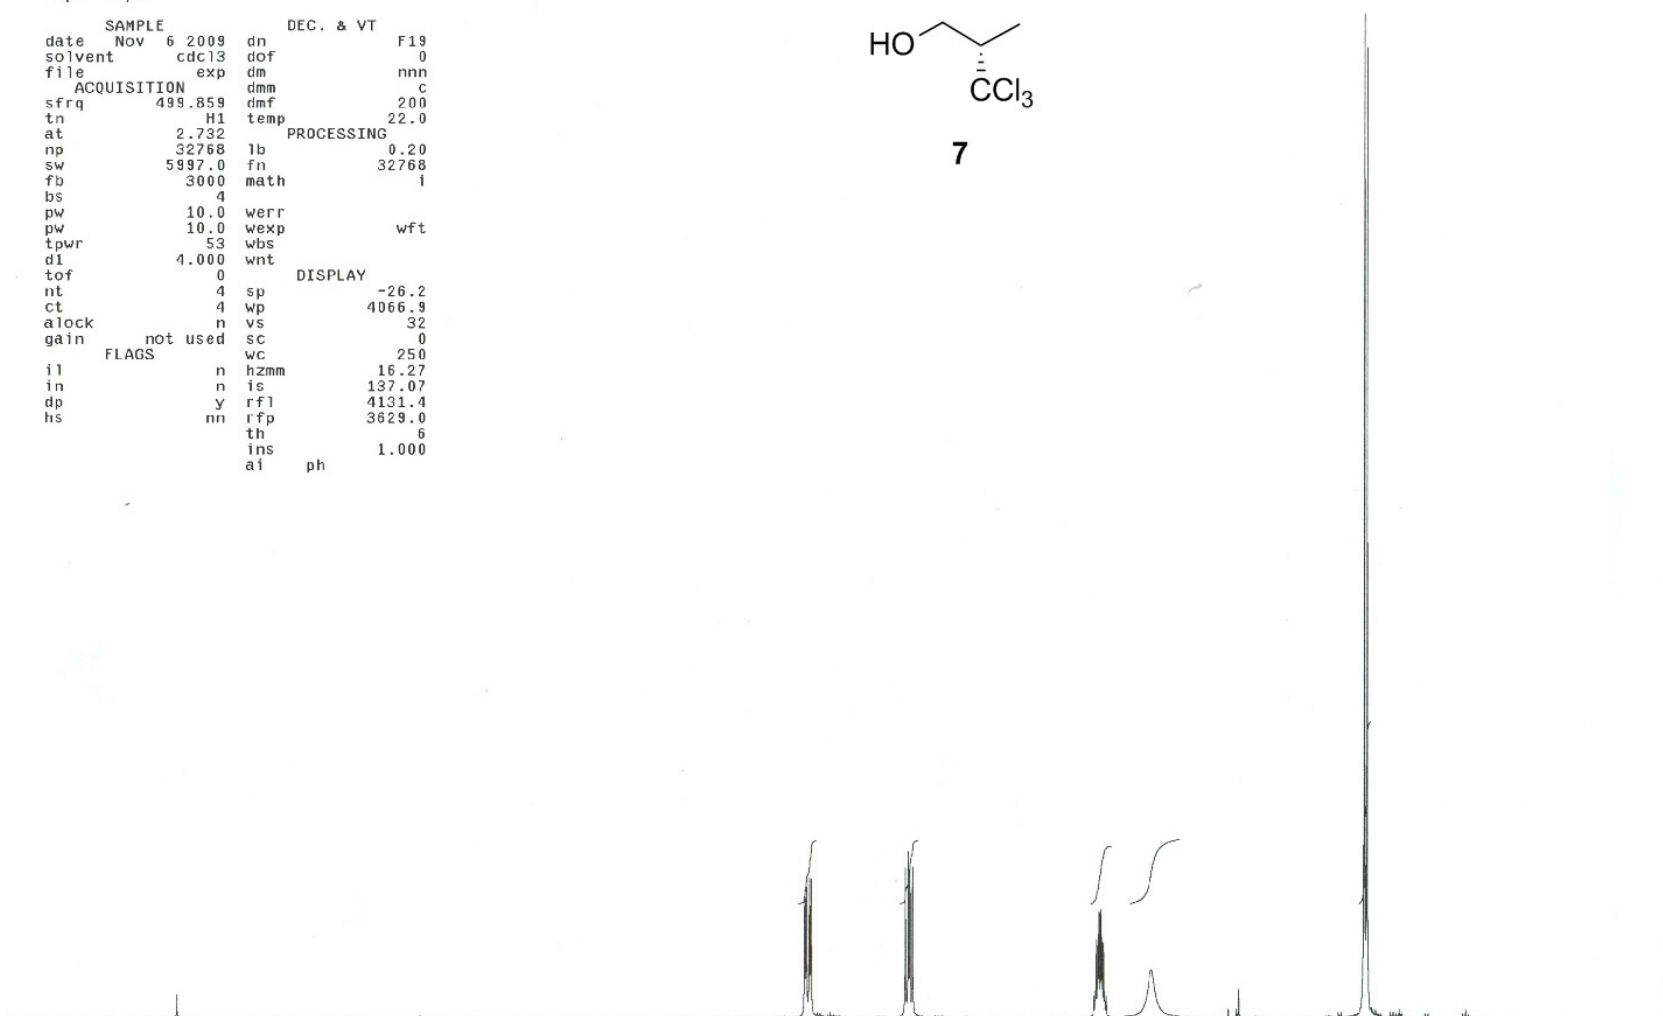

snb-2-078-a-13C

exp1 CARBON

| SAMPLE      |            | SPECIAL    |          |
|-------------|------------|------------|----------|
| date        | Nov 6 2009 | temp       | 22.0     |
| solvent     | CDCl3      | gain       | 42       |
| file        | exp        | spin       | 20       |
| ACQUISITION |            |            |          |
| sw          | 36003.6    | hst        | 0.008    |
| at          | 1.300      | pw90       | 9.200    |
| np          | 93644      | alfa       | 10.000   |
| fb          | 20000      | FLACS      |          |
| bs          | 4          | il         | n        |
| d1          | 1.000      | in         | n        |
| nt          | 128        | dp         | y        |
| ct          | 12         | hs         | nn       |
| TRANSMITTER |            | PROCESSING |          |
| tn          | C13        | lb         | 0.50     |
| sfrq        | 125.702    | fn         | not used |
| tof         | 865.4      | DISPLAY    |          |
| tpwr        | 56         | sp         | -319.1   |
| pw          | 9.200      | wp         | 23257.1  |
| DECOUPLER   |            | rfl        | 14909.9  |
| dn          | H1         | rfp        | 9707.0   |
| dof         | 0          | rp         | -54.0    |
| dm          | nyy        | lp         | -230.6   |
| decwave     |            | PLOT       |          |
| dpwr        | 36         | wc         | 250      |
| dmf         | 10104      | sc         | 0        |
|             |            | vs         | 1297     |
|             |            | lh         | 5        |
|             |            | ai         | cdc ph   |

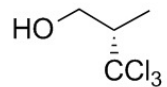

7

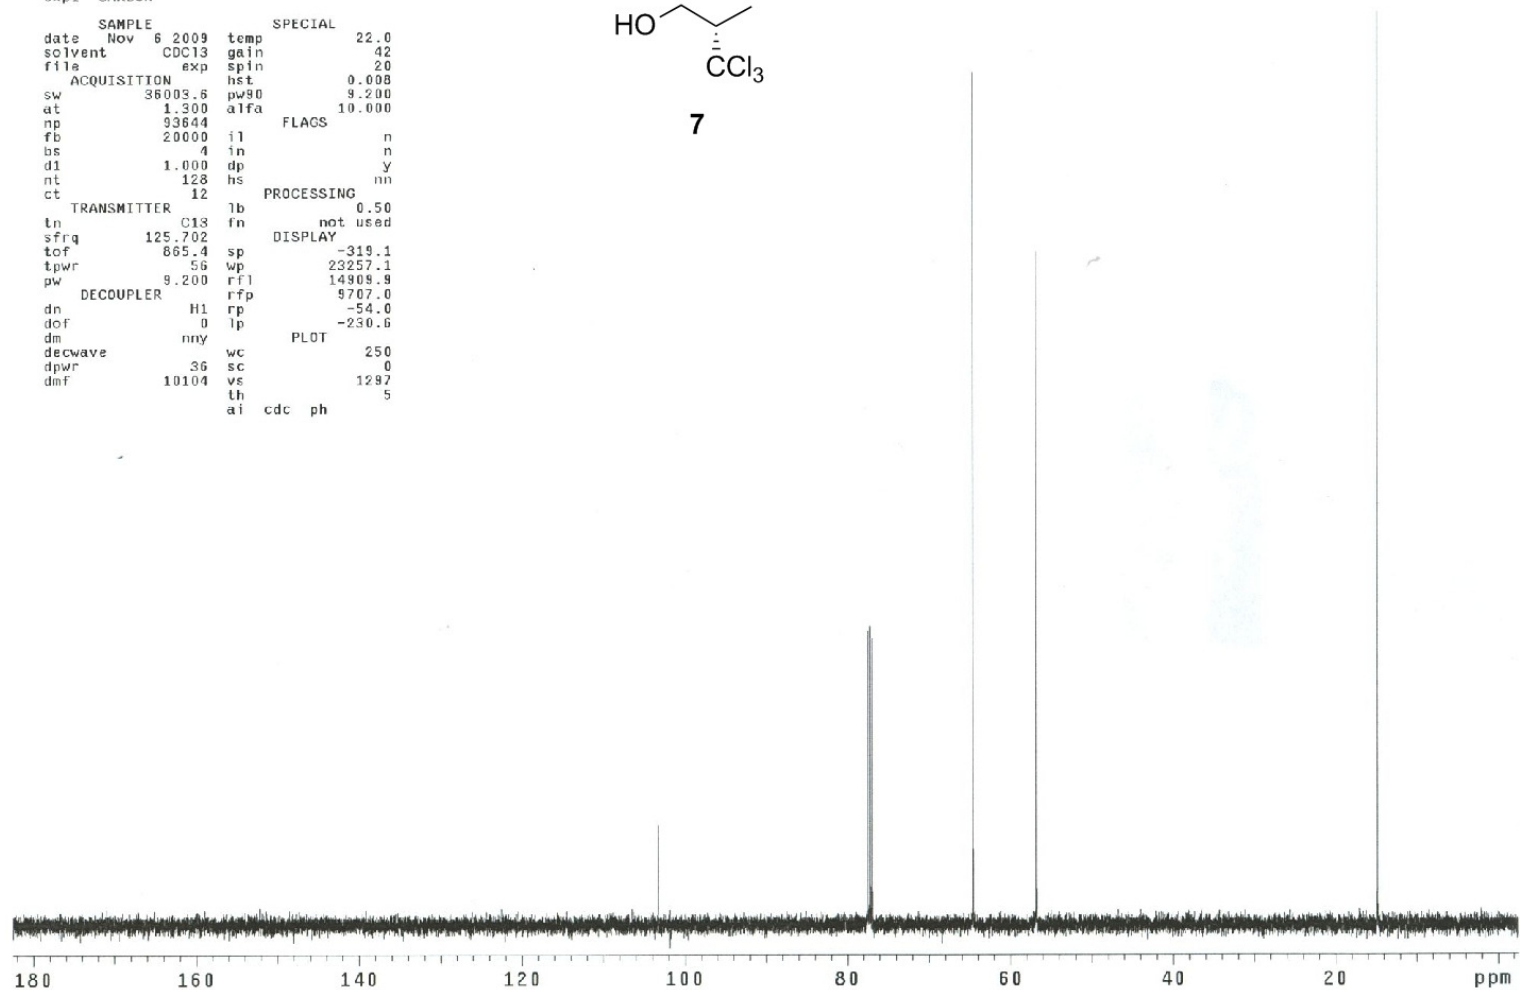

```

snb-2-020-a
exp1 s2pu1
SAMPLE          DEC. & VT
date Sep 4 2009 dn H1
solvent cdc13 dof -1425.0
file exp dm nnn
ACQUISITION    dmm c
sfrq 399.951 dmf 200
tn H1 PROCESSING
at 2.003 lb 0.10
np 20032 fn 32768
sw 5000.0 math i
fb 3000
bs 4 werr
pw 12.0 wexp
pw 12.0 wbs
tpwr 57 wnt
dl 4.000 DISPLAY
tof 0 sp -36.3
nt 8 wp 3683.2
ct 8 vs 67
alock n sc 0
gain not used wc 250
FLAGS hzmm 14.77
ll n ls 127.06
in n rfl 3396.8
dp y rfp 2903.6
hs nn th 9
ins
al ph 1.000

```

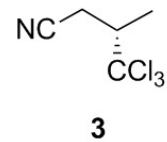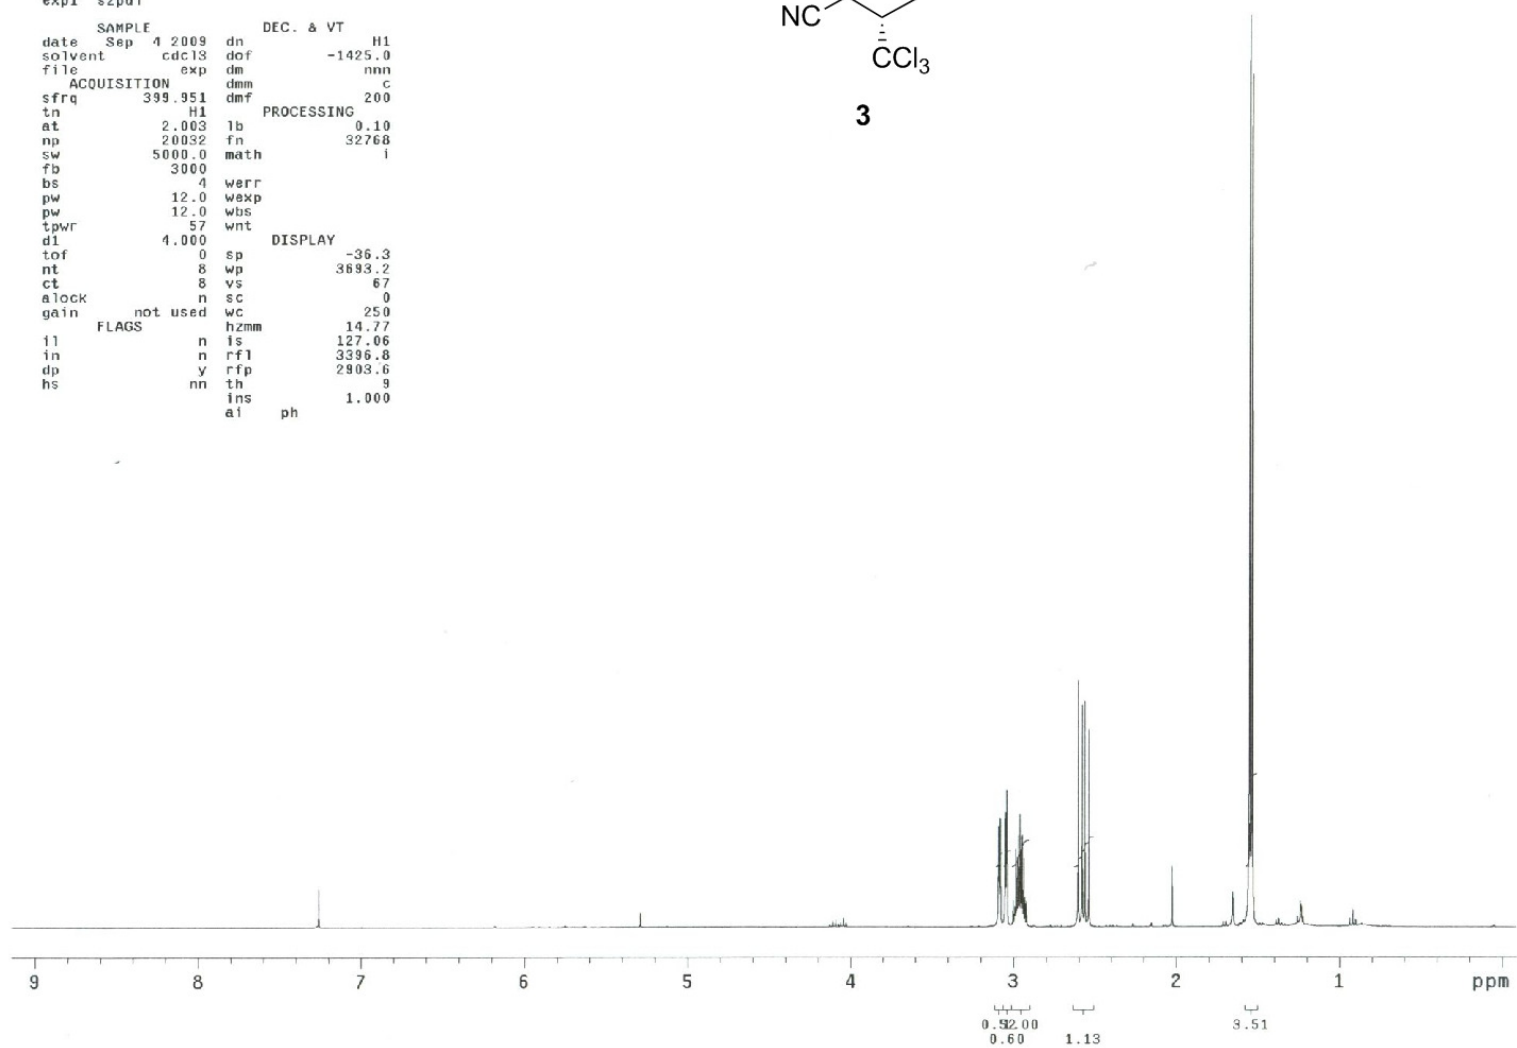

```

snb-2-020-a-13C
exp1 CARBON
SAMPLE
date Sep 7 2009 temp 22.0
solvent CDCl3 gain 42
file /home/Zakaria~ spin 20
n/beamont/snb-2-0~ hst 0.008
20-a-13C_500.fid pw90 9.200
ACQUISITION alfa 10.000
sw 36003.6 FLAGS
at 1.300 il n
np 93644 in n
fb 20000 dp y
bs 4 hs nn
d1 1.000 PROCESSING
nt 1024 lb 0.50
ct 52 fn not used
TRANSMITTER C13 DISPLAY
tn C13 sp -503.1
sfrq 125.702 wp 25847.9
tof 865.4 rfl 14915.4
tpwr 56 rfp 9707.0
pw 9.200 rp -60.1
DECOUPLER H1 lp -243.3
dn H1 PLOT
dof 0 wc 250
dm nny sc 0
decwave vs 1888
dpwr 36 th 7
dmf 10104 al cdc ph

```

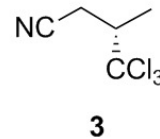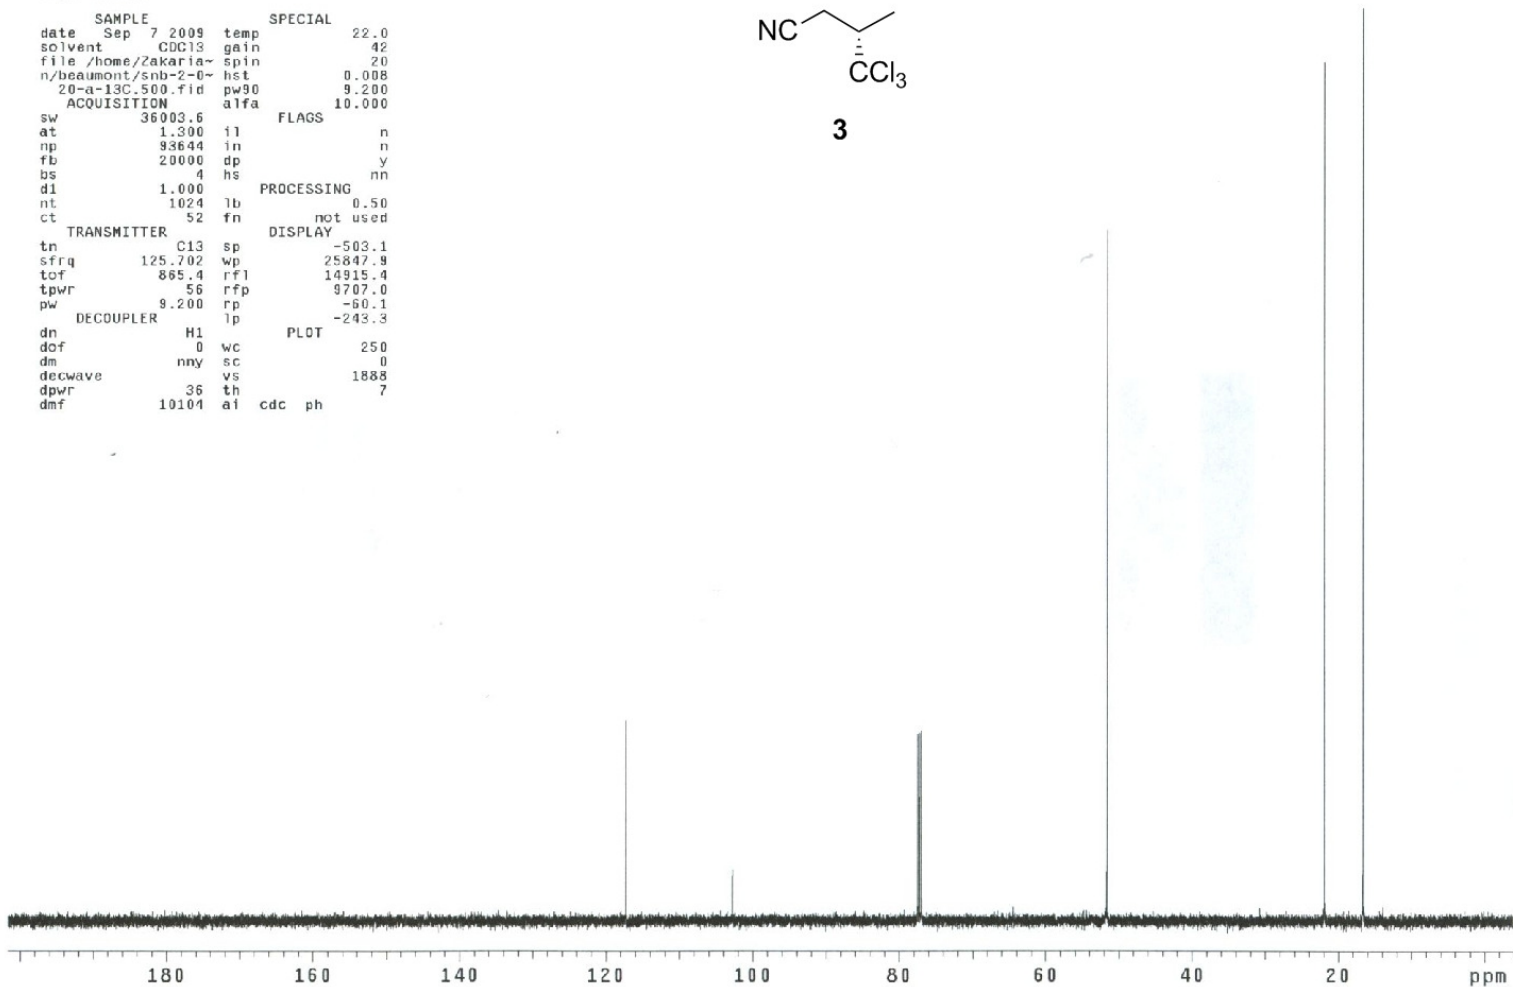

```

snb-2-024-a
exp1 s2pu1
SAMPLE DEC. & VT
date Sep 8 2009 dn F19
solvent cdc13 dof 0
file exp dm nnn
ACQUISITION dmm c
sfrq 499.859 dmf 200
tn H1 temp 22.0
at 2.732 PROCESSING
np 32768 lb 0.20
sw 5997.0 fn 32768
fb 3000 math i
bs 4
pw 10.0 warr
pw 10.0 wexp wft
tpwr 53 wbs
d1 4.000 wnt
tof 0 DISPLAY
nt 8 sp -36.8
ct 8 wp 4602.8
alock n vs 24
gain not used sc 0
FLAGS wc 250
il n hzmm 18.41
in n is 257.19
dp y rfl 4132.1
hs nn rfp 3629.0
th 80
ins 1.000
al ph

```

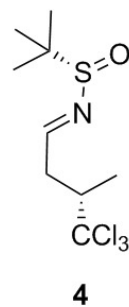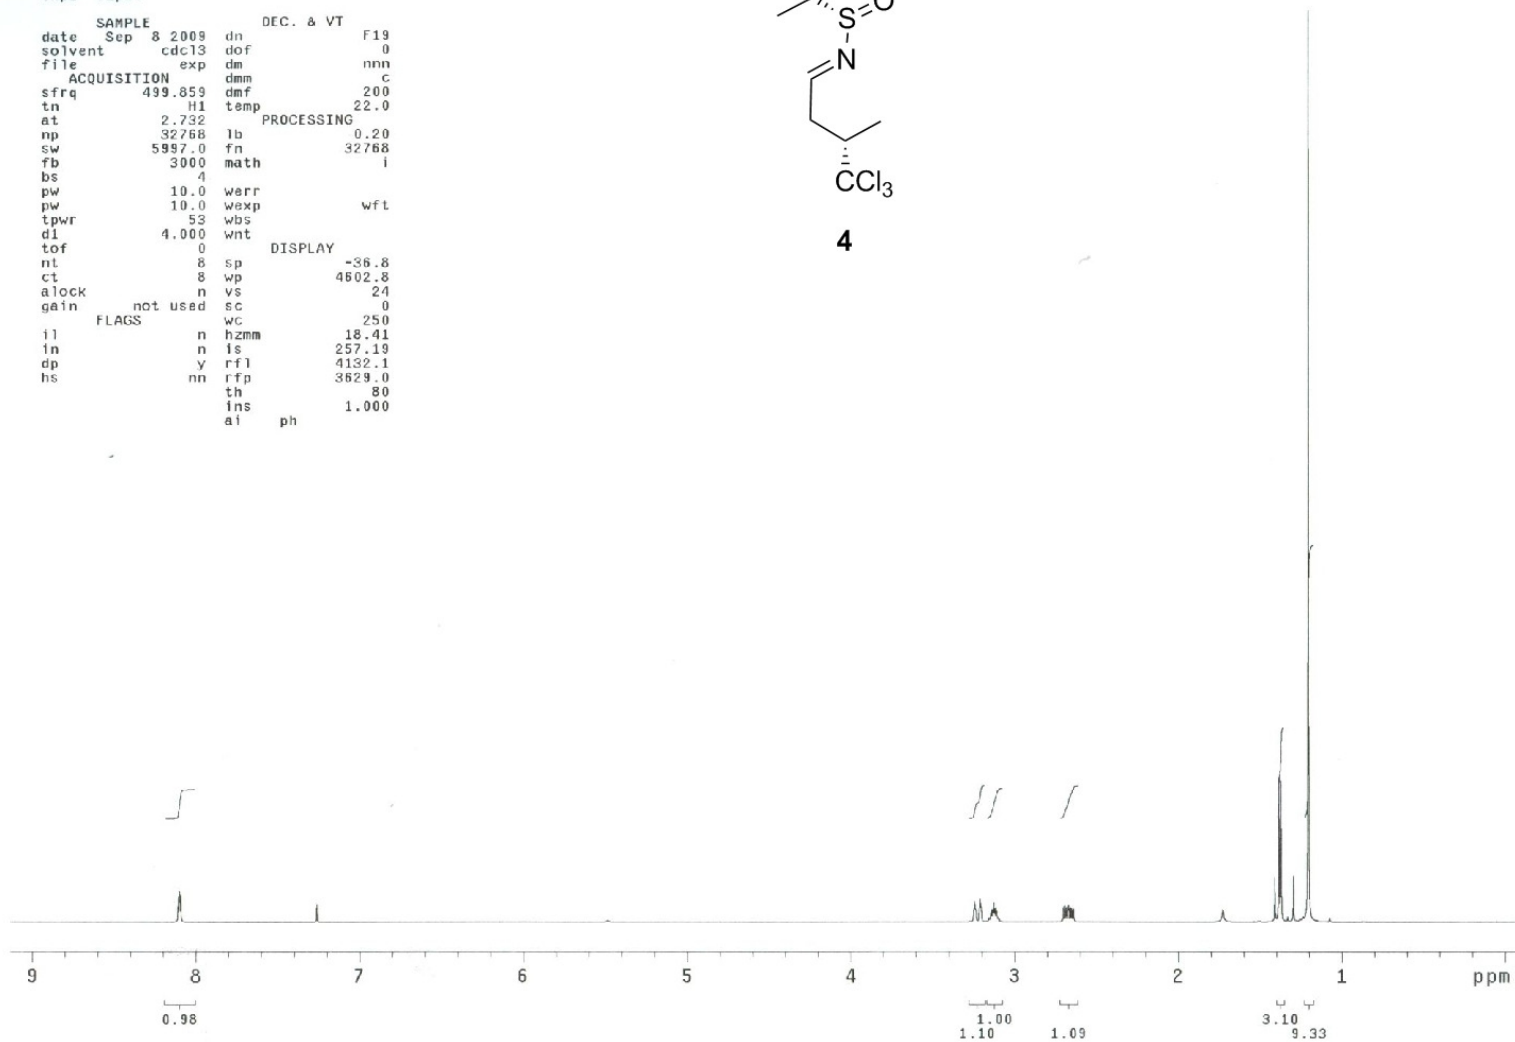

snb-2-024-a-13C

exp1 CARBON

| SAMPLE              |                | SPECIAL    |          |
|---------------------|----------------|------------|----------|
| date                | Sep 8 2009     | temp       | 22.0     |
| solvent             | CDCl3          | gain       | 42       |
| file                | /home/Zakaria~ | spin       | 20       |
| n/beaumont/snb-2-0~ |                | hst        | 0.008    |
| 24-a-13C.500.fid    |                | pw90       | 9.200    |
| ACQUISITION         | aifa           | aiifa      | 10.000   |
| sw                  | 36003.6        | FLAGS      |          |
| at                  | 1.300          | il         | n        |
| np                  | 93644          | in         | n        |
| fb                  | 20000          | dp         | y        |
| bs                  | 4              | hs         | nn       |
| d1                  | 4.000          | PROCESSING |          |
| nt                  | 128            | lb         | 0.50     |
| ct                  | 128            | fn         | not used |
| TRANSMITTER         | C13            | DISPLAY    |          |
| tn                  | C13            | sp         | -435.5   |
| sfrq                | 125.702        | wp         | 26503.3  |
| tof                 | 865.4          | rfl        | 14907.2  |
| tpwr                | 56             | rfp        | 9707.0   |
| pw                  | 9.200          | rp         | -76.9    |
| DECOUPLER           | H1             | lp         | -261.3   |
| dn                  | H1             | PLOT       |          |
| dof                 | 0              | wc         | 250      |
| dm                  | nn             | sc         | 0        |
| decwave             |                | vs         | 3310     |
| dpwr                | 36             | th         | 8        |
| dmf                 | 10104          | ai         | cdc ph   |

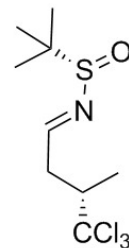

4

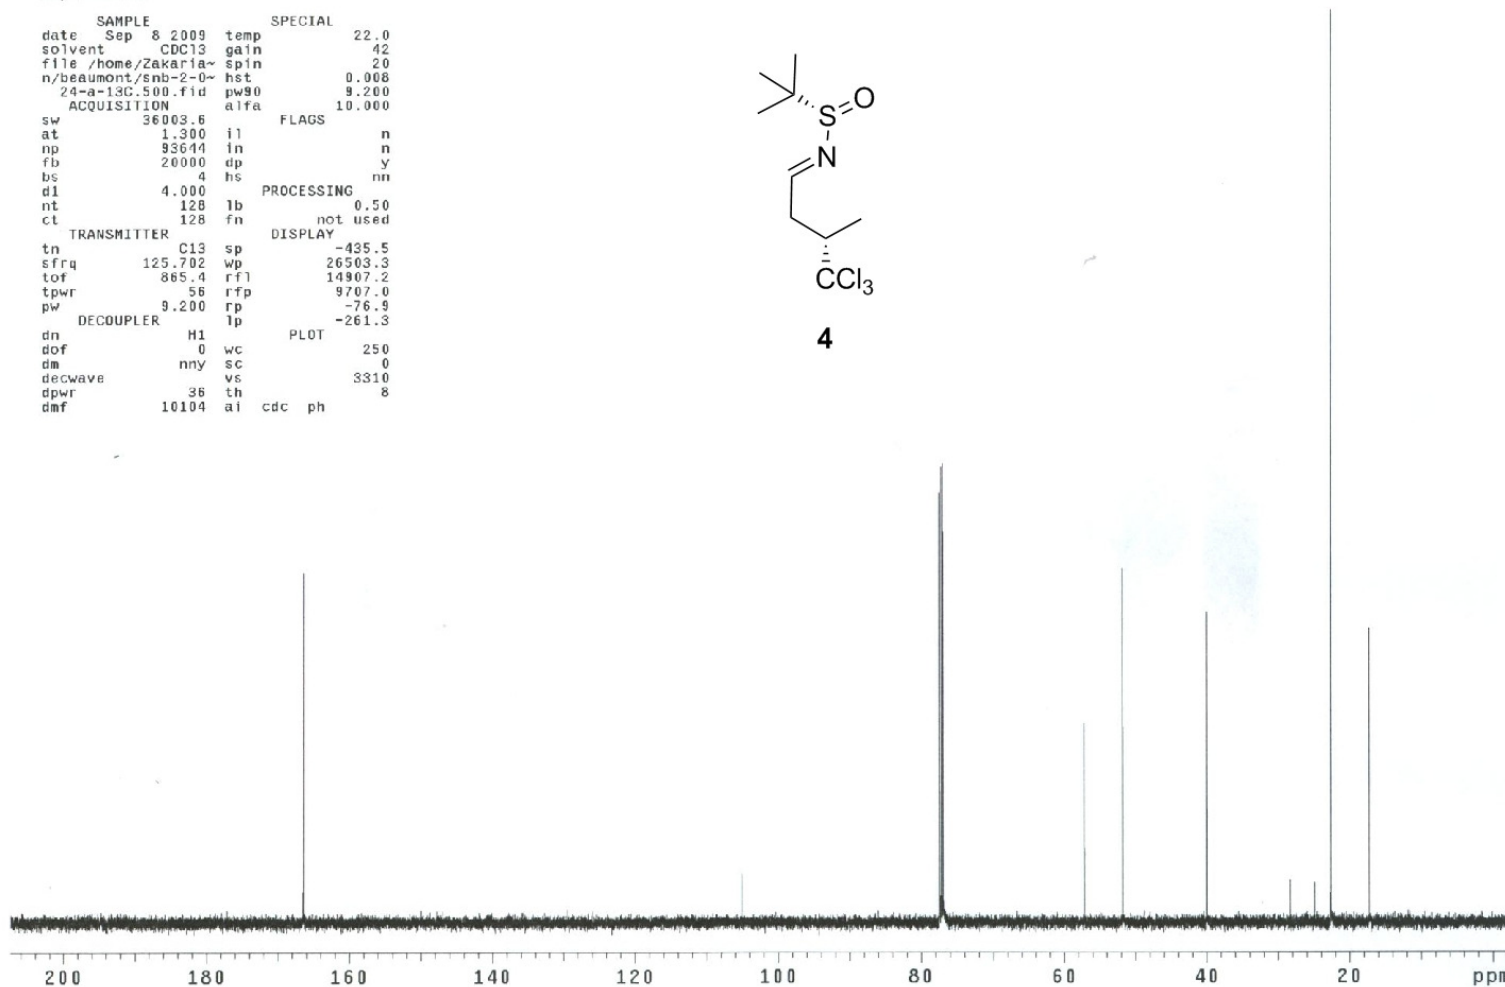



snb-2-054-a

expl s2pu1

| SAMPLE      |            | DEC. & VT  |        |
|-------------|------------|------------|--------|
| date        | Oct 7 2009 | dn         | F19    |
| solvent     | cdcl3      | dof        | 0      |
| file        | exp        | dm         | nmn    |
| ACQUISITION |            | PROCESSING |        |
| sfrq        | 499.859    | dmm        | c      |
| tn          | H1         | dmf        | 200    |
| at          | 2.752      | temp       | 22.0   |
| np          | 32768      | lb         | 0.20   |
| sw          | 5997.0     | fn         | 32768  |
| fb          | 3000       | math       | i      |
| bs          | 4          |            |        |
| pw          | 10.0       | werr       |        |
| pw          | 10.0       | wexp       | wft    |
| tpwr        | 53         | wbs        |        |
| d1          | 4.000      | wnt        |        |
| tof         | 0          | DISPLAY    |        |
| nt          | 8          | sp         | -66.1  |
| ct          | 8          | wp         | 3819.1 |
| alock       | n          | vs         | 24     |
| gain        | not used   | sc         | 0      |
| FLAGS       |            | wc         | 250    |
| il          | n          | hzmm       | 15.28  |
| in          | n          | fs         | 137.07 |
| dp          | y          | rfl        | 4131.7 |
| hs          | nn         | rfp        | 3629.0 |
|             |            | th         | 13     |
|             |            | ins        | 1.000  |
|             |            | al         | ph     |

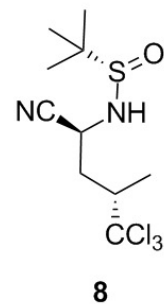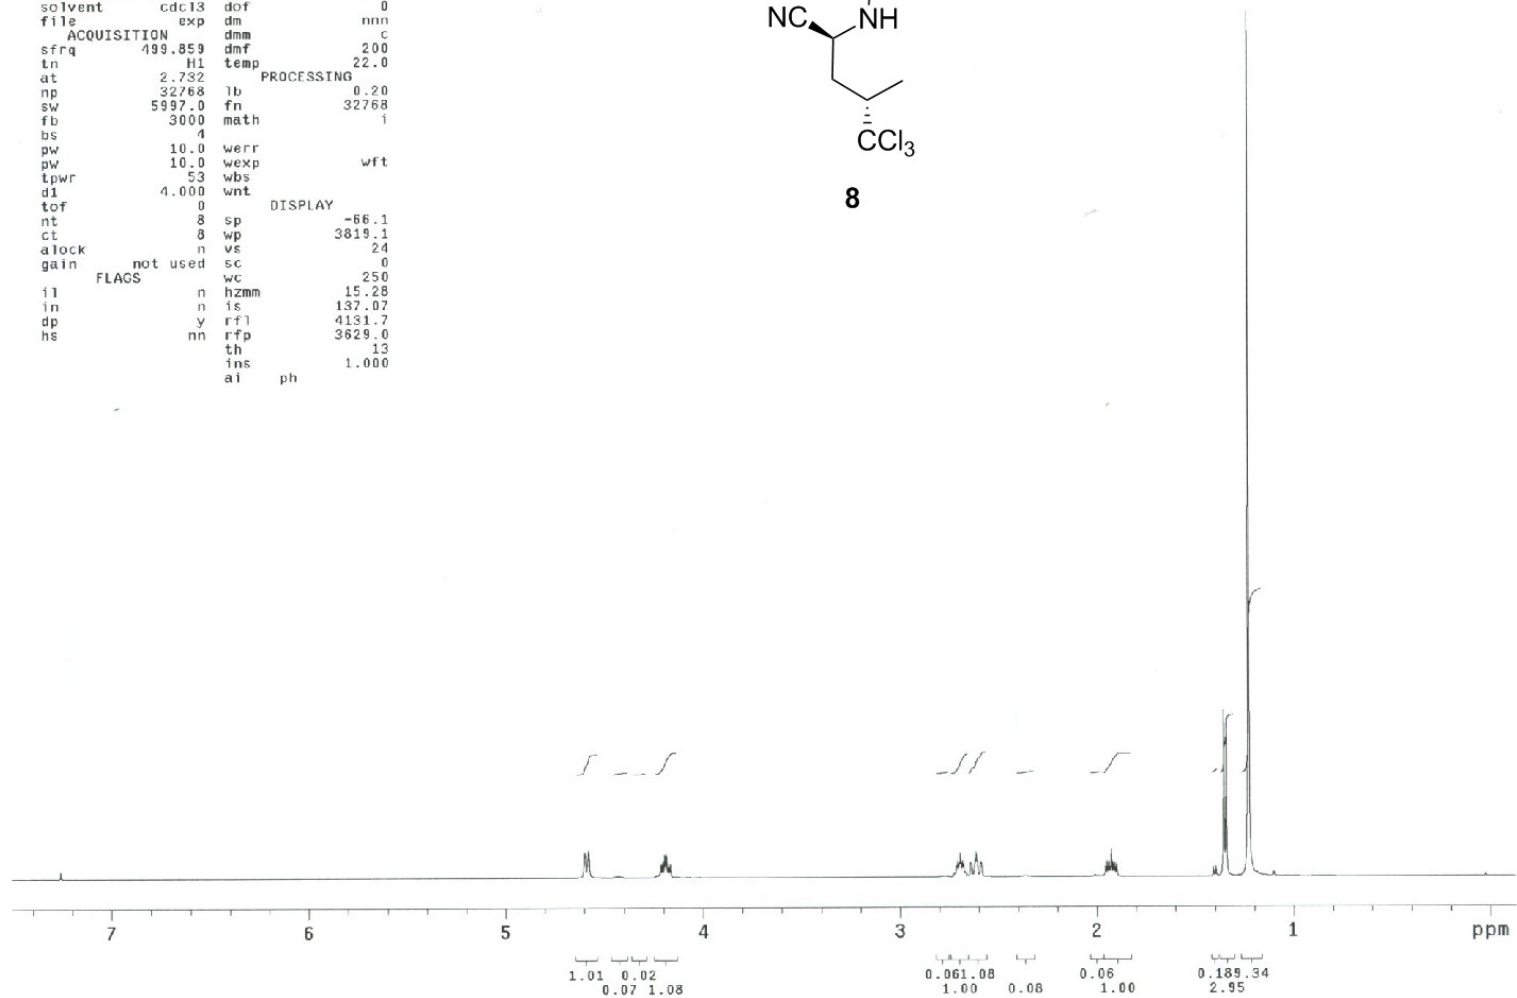



```

trichloroleucine-HCl salt
exp1 s2pu1
SAMPLE          DEC. & VT
date Oct 26 2009 dn          F19
solvent d2o          dof          0
file exp          dm          nnn
ACQUISITION    dmm          c
sfreq 499.860      dmf          200
tn          H1          temp        22.0
at 2.732          PROCESSING
np 32768          lb          0.10
sw 5997.0         fn          32768
fb 3000          math          i
bs 4
pw 7.0          werr
pw 7.0          wexp          wft
tpwr 53         vbs
d1 4.000       wnt
tof 0          DISPLAY
nt 16         sp          450.9
dt 16         vp          2003.6
dlock n        vs          1458
gain not used  sc          0
FLAGS        wc          250
fl n         hzmm        8.01
fn n         is          1298.38
dp y         rfl         2826.5
hs nn        rfp         2399.3
          th          2
          ins         1.000
          ai          ph

```

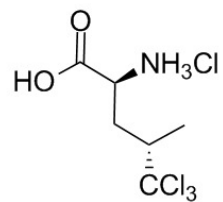

**(2S,4S)-5,5,5-trichloroleucine**

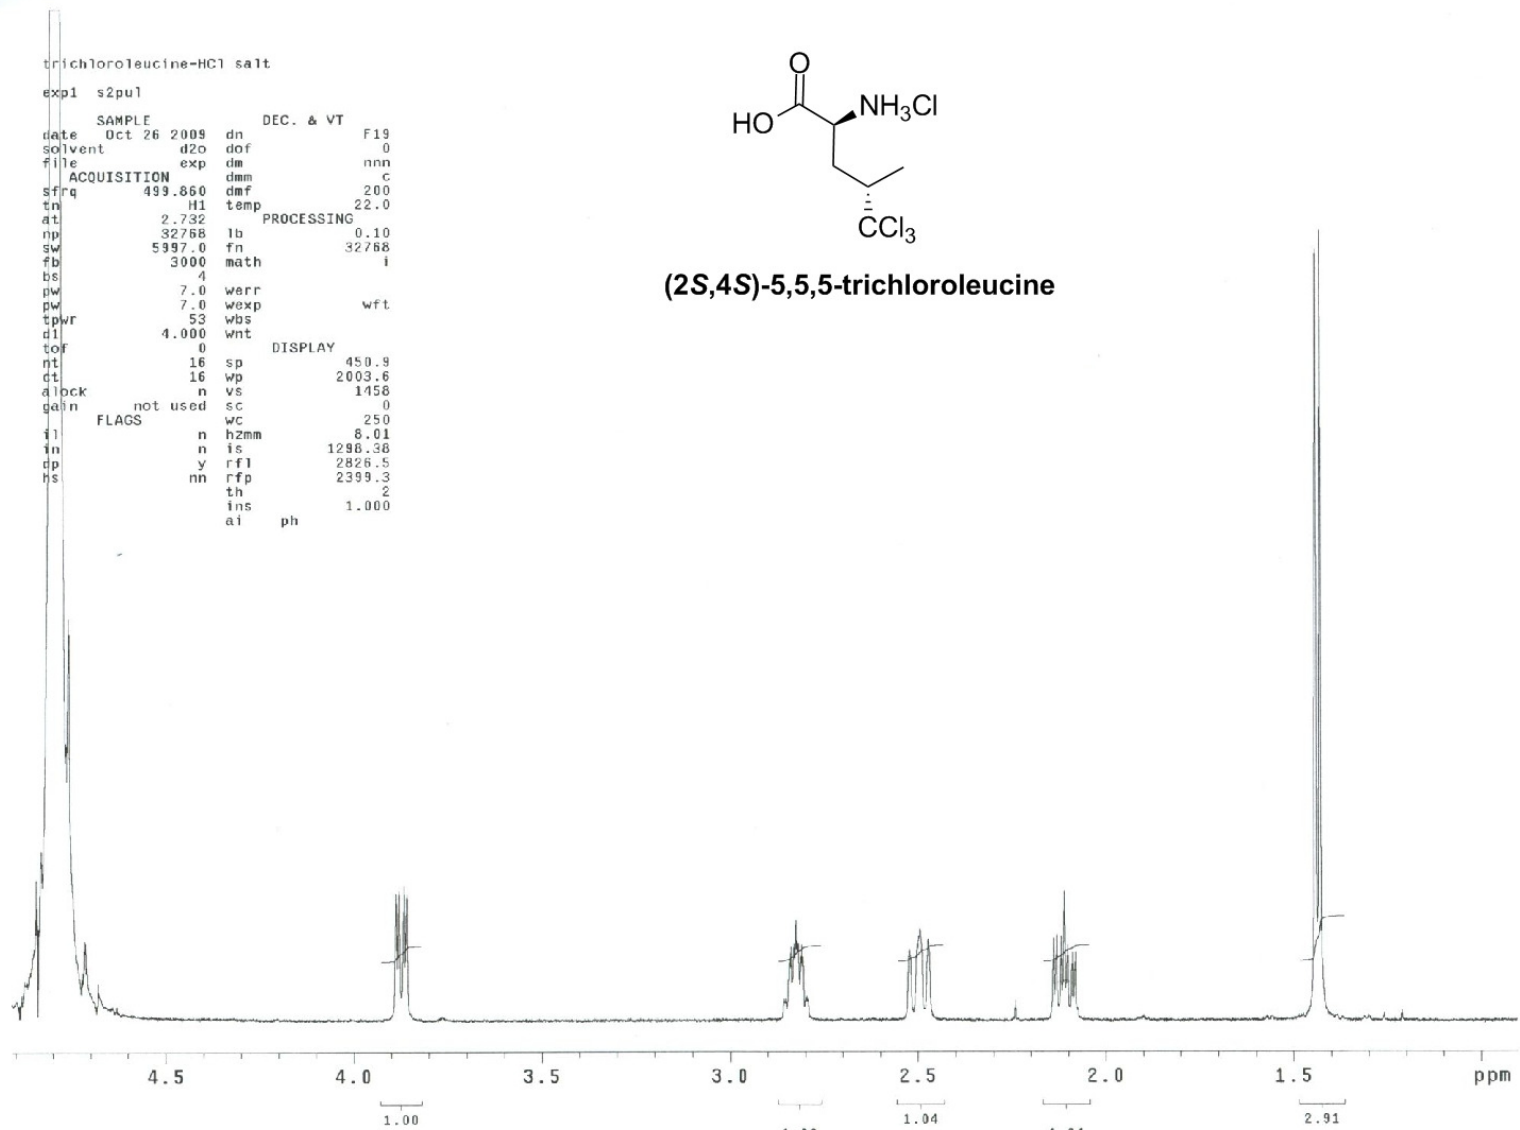

```

snb-trichloroleucine-13C-D2O-MeOD
exp1 CARBON
SAMPLE SPECIAL
date Nov 20 2009 temp 22.0
solvent cd3od gain 42
file exp spin 20
ACQUISITION hst 0.008
sw 36003.6 pw90 9.200
at 1.300 alfa 10.000
np 93644 FLAGS
fb 20000 i1 n
bs 4 in n
d1 1.000 dp y
nt 10000 hs nn
ct 461 PROCESSING
tn C13 fb 0.50
sfrq 125.702 fn not used
tof 865.4 sp DISPLAY
tpwr 56 wp 25480.8
pw 9.200 rfl 11056.6
DECOUPLER rfp 6177.6
dn H1 rp -49.4
dof 0 lp -259.2
dm nny PLOT
decwave wc 250
dpwr 36 sc 0
dmf 10104 vs 18375
th ai cdc ph 5

```

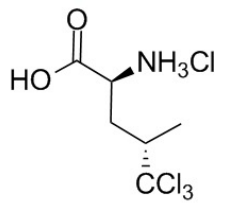

(2S,4S)-5,5,5-trichloroleucine

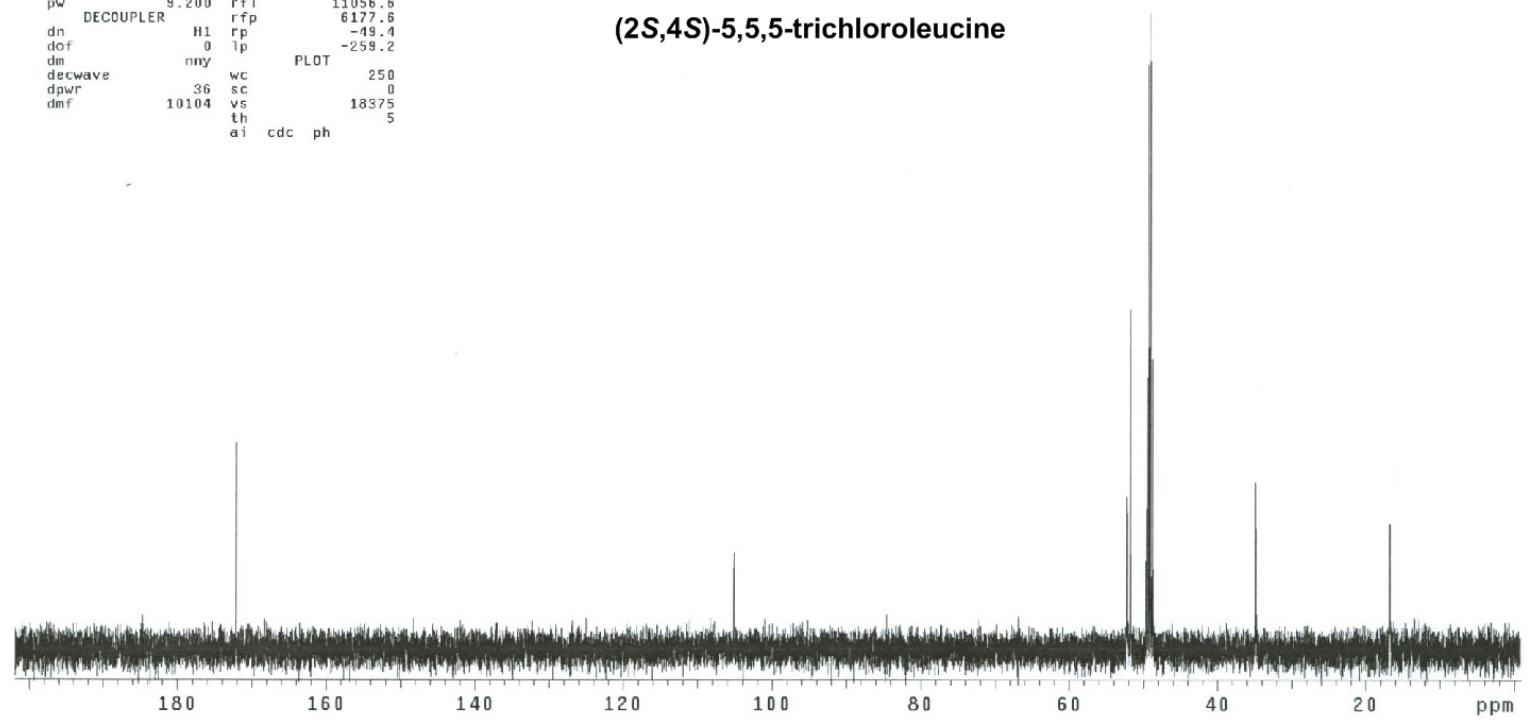

snb-2-034-crude2

exp1 s2pu1

| SAMPLE      |             | DEC. & VT |        |
|-------------|-------------|-----------|--------|
| date        | Sep 14 2009 | dn        | F19    |
| solvent     | cdcl3       | dof       | 0      |
| file        | exp         | dm        | nnn    |
| ACQUISITION |             |           |        |
| sfrq        | 499.859     | dmm       | c      |
| in          | H1          | dmf       | 200    |
| at          | 2.732       | temp      | 22.0   |
| PROCESSING  |             |           |        |
| np          | 32768       | lb        | 0.20   |
| sw          | 5997.0      | fn        | 32768  |
| fb          | 3000        | math      | i      |
| bs          | 4           |           |        |
| pw          | 10.0        | werr      |        |
| pw          | 10.0        | wexp      | wft    |
| tpwr        | 53          | wbs       |        |
| d1          | 4.000       | wnt       |        |
| tof         | 0           | DISPLAY   |        |
| nt          | 8           | sp        | -105.6 |
| ct          | 8           | wp        | 5584.9 |
| alock       |             | n         | vs     |
| gain        | not used    | sc        | 47     |
| FLAGS       |             | wc        | 0      |
|             |             | ns        | 250    |
| il          | n           | hzmm      | 22.34  |
| in          | n           | is        | 227.62 |
| dp          | y           | rfl       | 4131.7 |
| hs          | nn          | rfp       | 3629.0 |
|             |             | th        | 3      |
|             |             | ins       | 1.000  |
|             |             | al        | ph     |

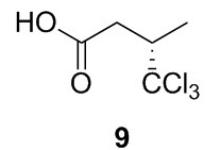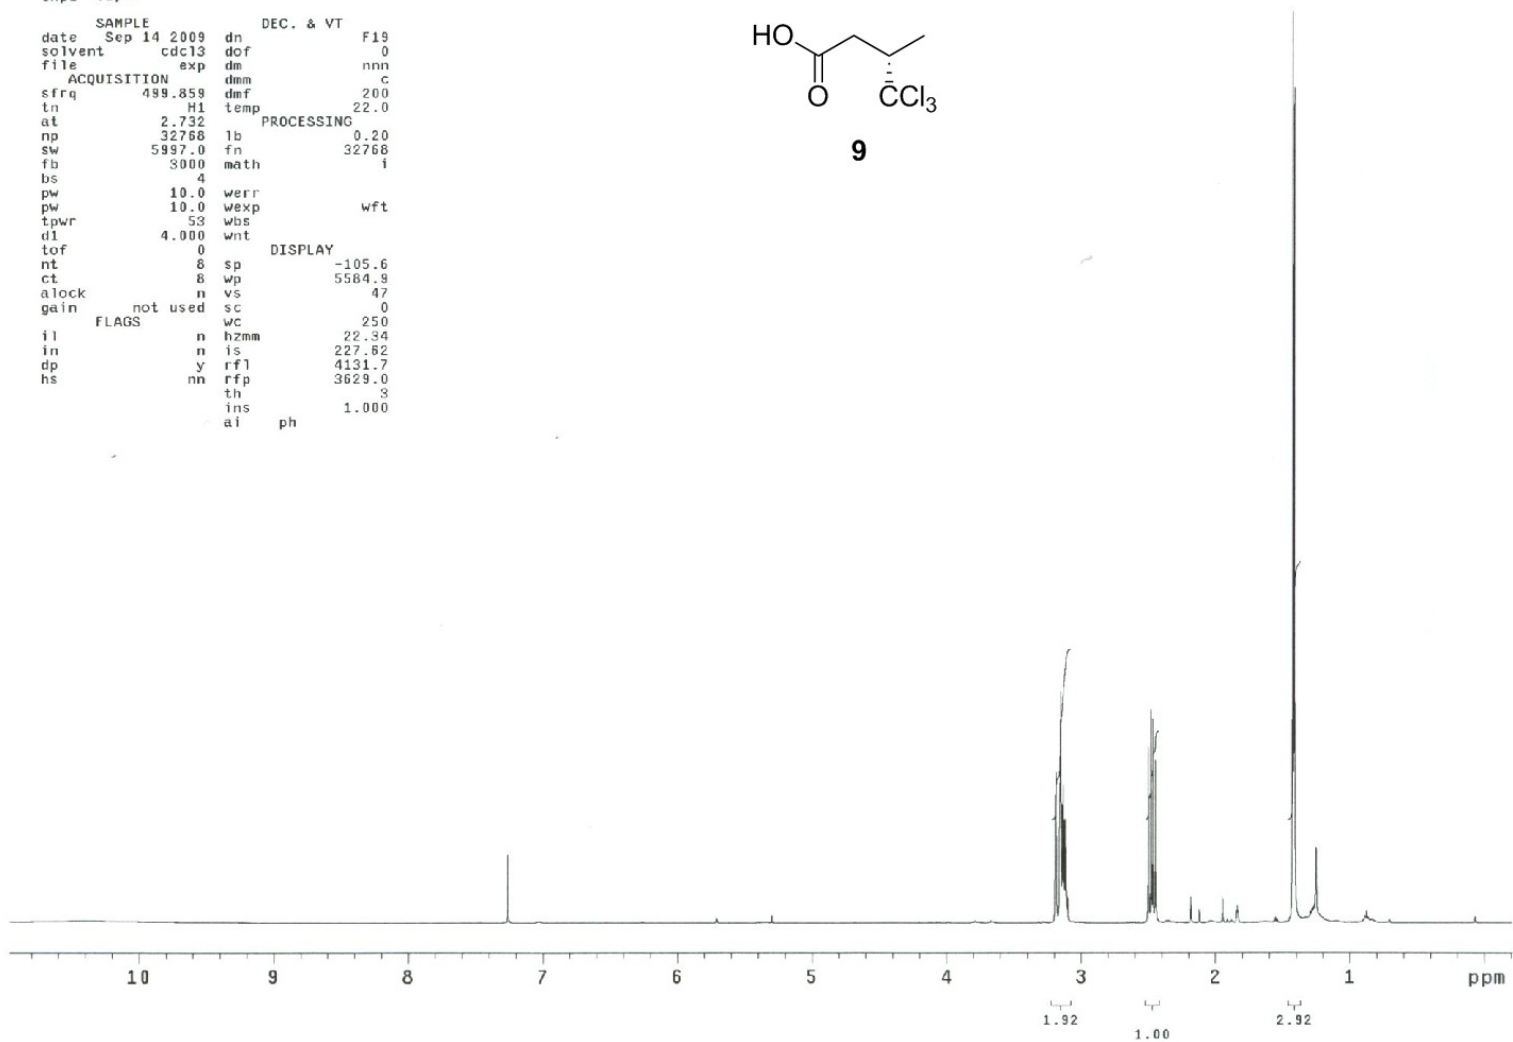

snb-2-034-a-13C

exp1 CARBON

| SAMPLE              |                | SPECIAL    |          |
|---------------------|----------------|------------|----------|
| date                | Sep 14 2009    | temp       | 22.0     |
| solvent             | CDCl3          | gain       | 42       |
| file                | /home/Zakaria- | spin       | 20       |
| n/beaumont/snb-2-0- |                | hst        | 0.008    |
| 34-a-13C.500.fid    |                | pw90       | 9.200    |
| ACQUISITION         |                | alfa       | 10.000   |
| sw                  | 36003.6        | FLAGS      |          |
| at                  | 1.300          | il         | n        |
| np                  | 93644          | in         | n        |
| fb                  | 20000          | dp         | y        |
| bs                  | 4              | hs         | nn       |
| d1                  | 1.000          | PROCESSING |          |
| nt                  | 256            | lb         | 0.50     |
| ct                  | 64             | fn         | not used |
| TRANSMITTER         |                | DISPLAY    |          |
| tn                  | C13            | sp         | -401.5   |
| sfrq                | 125.702        | wp         | 26145.7  |
| tof                 | 865.4          | rfl        | 14873.1  |
| tpwr                | 56             | rfp        | 9707.0   |
| pw                  | 9.200          | rp         | -68.3    |
| DECOUPLER           |                | lp         | -244.2   |
| dn                  | H1             | PLOT       |          |
| dof                 | 0              | wc         | 250      |
| dm                  | nyy            | sc         | 0        |
| decwave             |                | vs         | 4016     |
| dpwr                | 36             | th         | 8        |
| dmf                 | 10104          | ai         | cdc ph   |

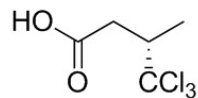

9

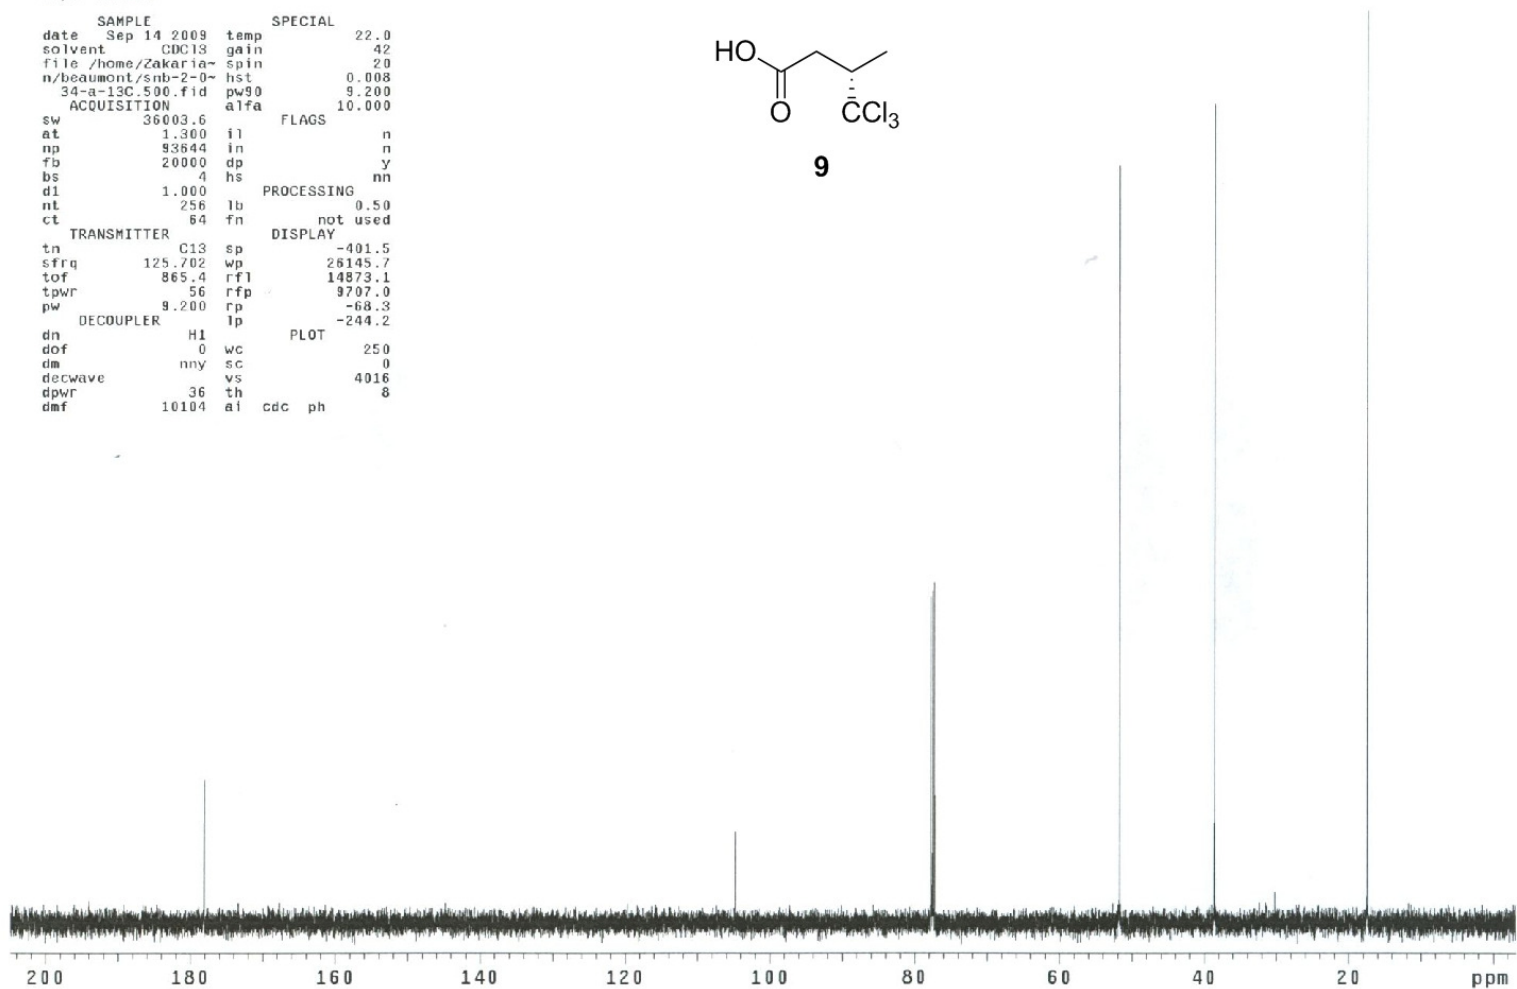

snb-2-078-a

expl s2pul

|             |             |            |        |
|-------------|-------------|------------|--------|
| SAMPLE      |             | DEC. & VT  |        |
| date        | Oct 15 2009 | dn         | F19    |
| solvent     | cdc13       | dof        | 0      |
| file        | exp         | dm         | nnn    |
| ACQUISITION |             | dmm        | C      |
| sfrq        | 499.859     | dmf        | 200    |
| tn          | H1          | temp       | 22.0   |
| at          | 2.732       | PROCESSING |        |
| np          | 32768       | lb         | 0.20   |
| sw          | 5997.0      | fn         | 32768  |
| fb          | 3000        | math       | I      |
| bs          | 4           |            |        |
| pw          | 10.0        | werr       |        |
| pw          | 10.0        | wexp       | wfl    |
| tpwr        | 53          | wbs        |        |
| d1          | 4.000       | wnt        |        |
| tof         | 0           | DISPLAY    |        |
| nt          | 8           | sp         | -44.9  |
| ct          | 8           | wp         | 4617.4 |
| alock       | n           | vs         | 77     |
| gain        | not used    | sc         | 0      |
| FLAGS       |             | wc         | 250    |
| il          | n           | hzmm       | 18.47  |
| in          | n           | is         | 137.07 |
| dp          | y           | rfl        | 4130.3 |
| hs          | nn          | rfp        | 3629.0 |
|             |             | th         | 13     |
|             |             | ins        | 1.000  |
|             |             | at         | ph     |

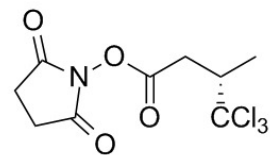

5

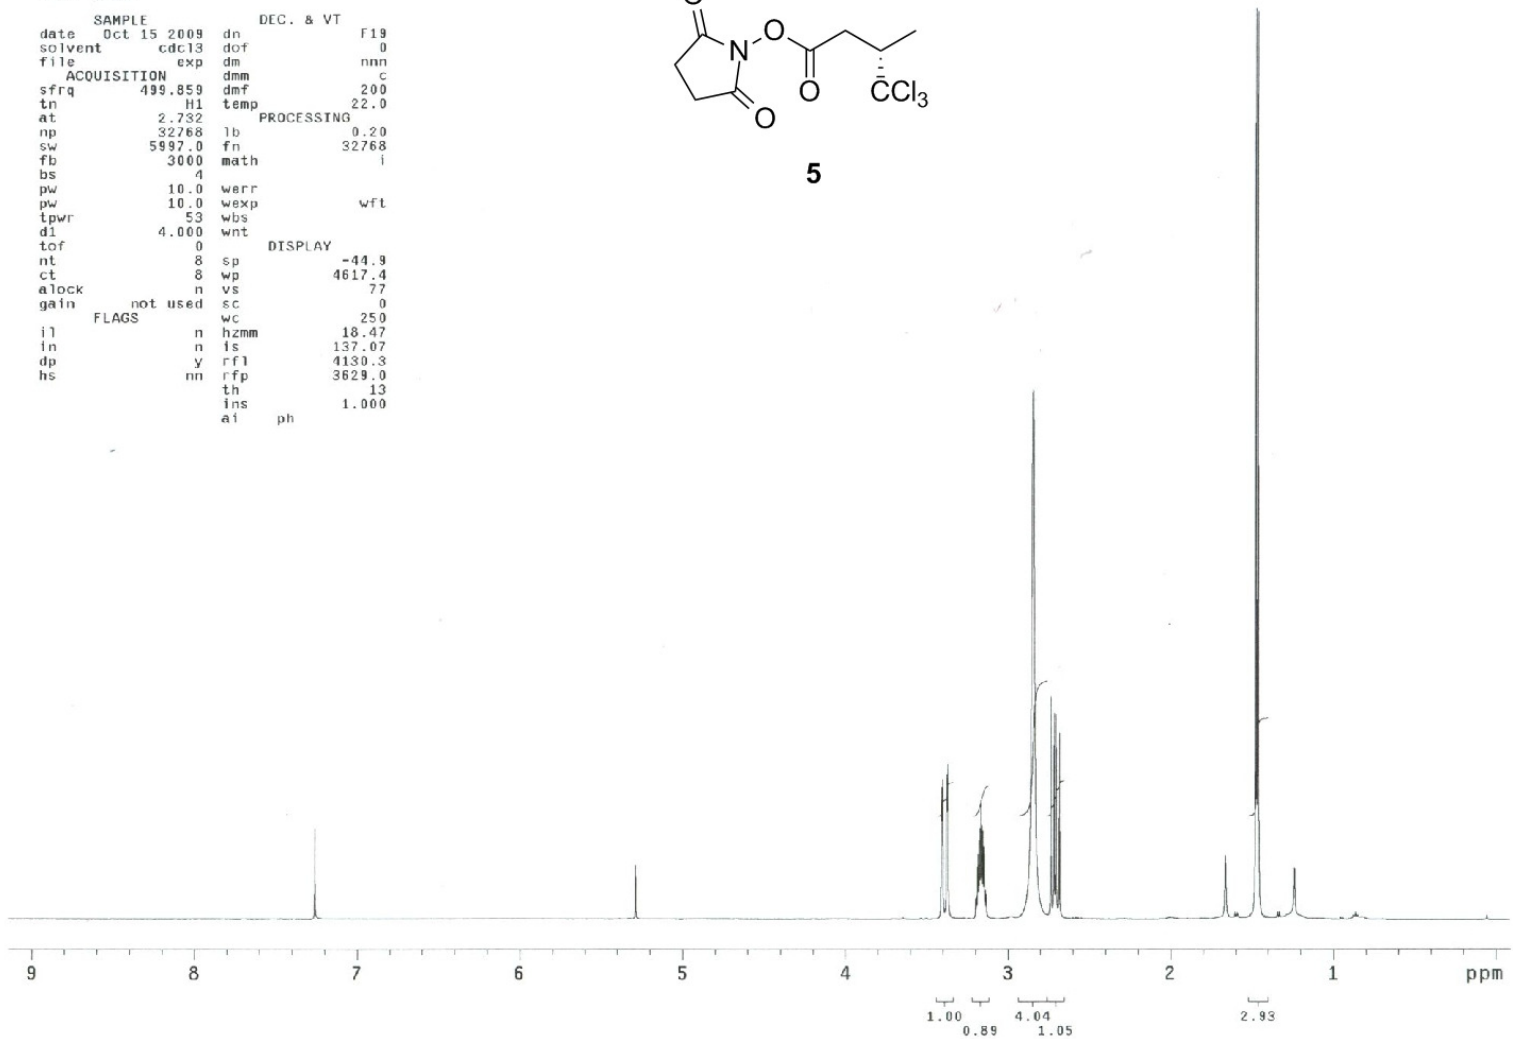

snb-2-078-a-13C

exp1 CARBON

| SAMPLE             |                | SPECIAL    |          |
|--------------------|----------------|------------|----------|
| date               | Oct 15 2009    | temp       | 22.0     |
| solvent            | CDCl3          | gain       | 42       |
| file               | /home/Zakaria~ | spin       | 20       |
| n/beamont/snb-2-0~ |                | hst        | 0.008    |
| 78-a-13C.500.fid   |                | pw90       | 9.200    |
| ACQUISITION        | alpha          | alpha      | 10.000   |
| sw                 | 36003.6        | FLAGS      |          |
| at                 | 1.300          | il         | n        |
| np                 | 93644          | in         | n        |
| fb                 | 20000          | dp         | y        |
| bs                 | 4              | hs         | nn       |
| d1                 | 1.000          | PROCESSING |          |
| nt                 | 128            | lb         | 0.50     |
| ct                 | 32             | fn         | not used |
| TRANSMITTER        | C13            | sp         | -49.9    |
| tn                 |                | wp         | 25550.2  |
| sfrq               | 125.702        | rfl        | 14908.8  |
| tof                | 865.4          | rfl        | 14908.8  |
| tpwr               | 56             | rfl        | 9707.0   |
| pw                 | 9.200          | rp         | -45.6    |
| DECOUPLER          | H1             | lp         | -251.7   |
| dn                 |                | PLOT       |          |
| dof                | 0              | wc         | 250      |
| dm                 | nyy            | sc         | 0        |
| dscwave            |                | vs         | 2810     |
| dpr                | 36             | th         | 5        |
| dmf                | 10104          | ai         | cdc ph   |

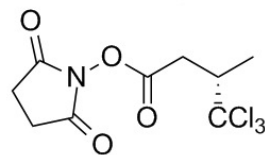

5

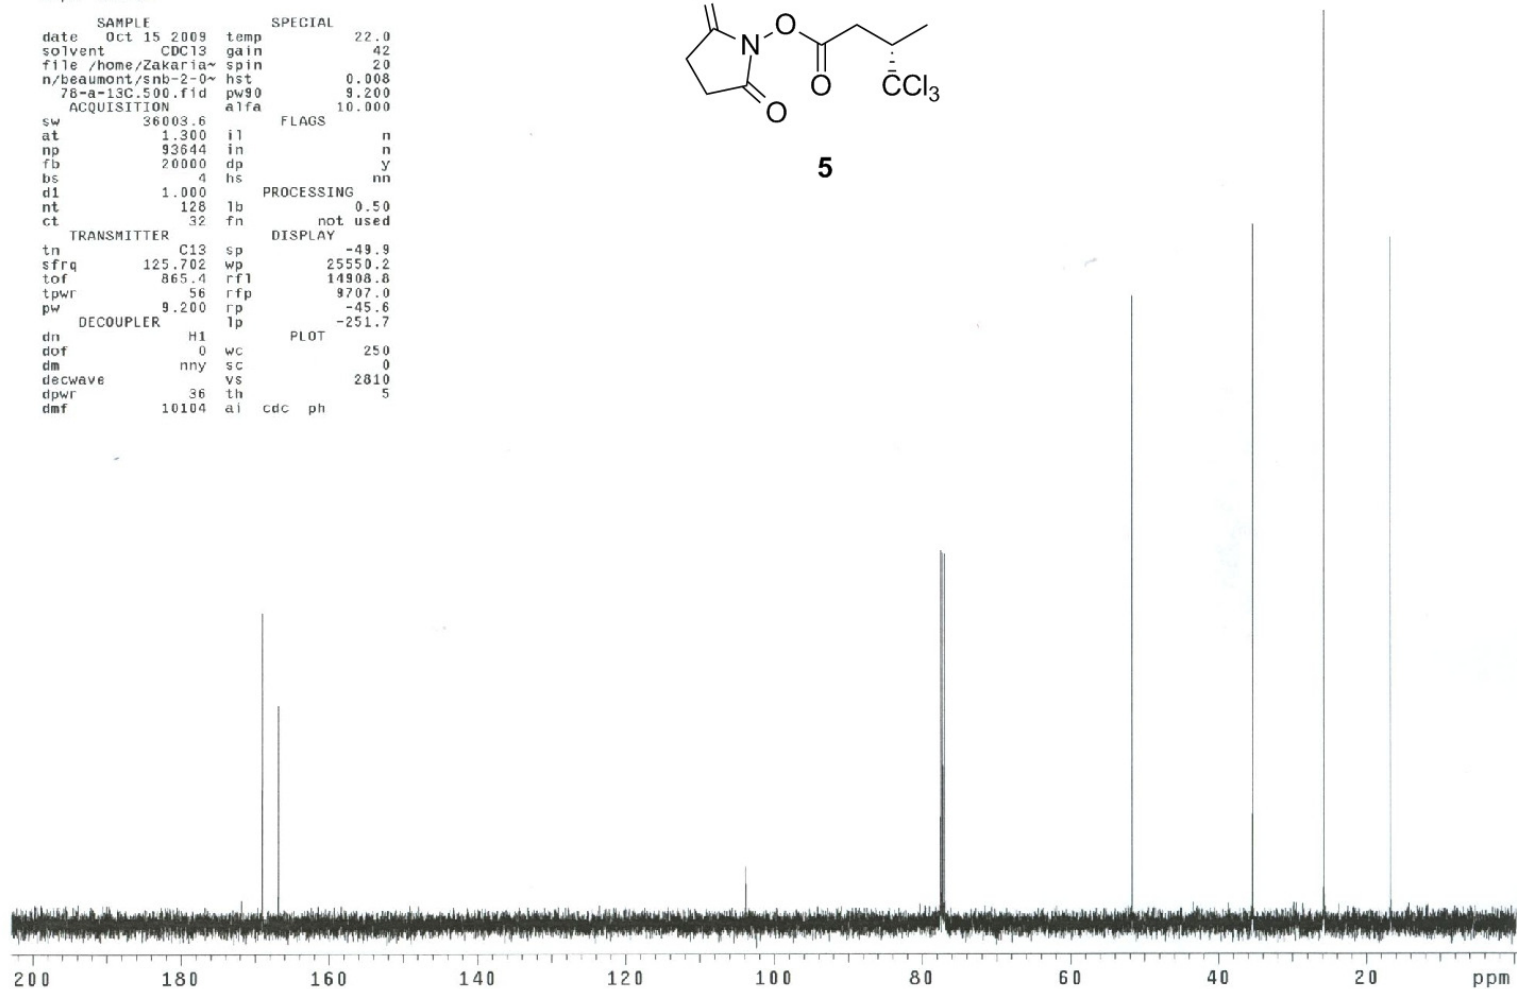



```

snb-2-086-a
exp1 s2pu1
SAMPLE          DEC. & VT
date Nov 14 2009 dn          F19
solvent cd3od  dof          0
file          exp  dm          nnn
ACQUISITION    dmm          c
sfrq 499.861  dmf          200
tn          H1    temp        22.0
at 2.732      PROCESSING
np 32768      lb          0.20
sw 5997.0     fn          32768
fb 3000       math         i
bs 4
pw 10.0       werr
pw 10.0       wexp          wft
tpwr 53
d1 4.000      wbs
tof 0         wnt
nt 16         sp          DISPLAY -26.9
ct 16         wp          4310.0
alock n       vs          115
gain not used sc          0
FLAGS        wc          250
il n         hzmm        17.24
in n         is          130.11
dp y         rfl         2937.4
hs nn        rfp         2434.3
                th          2
                lns         1.000
                ai          ph

```

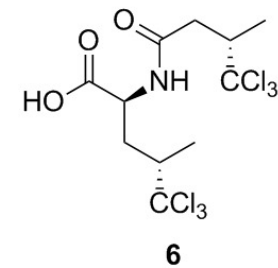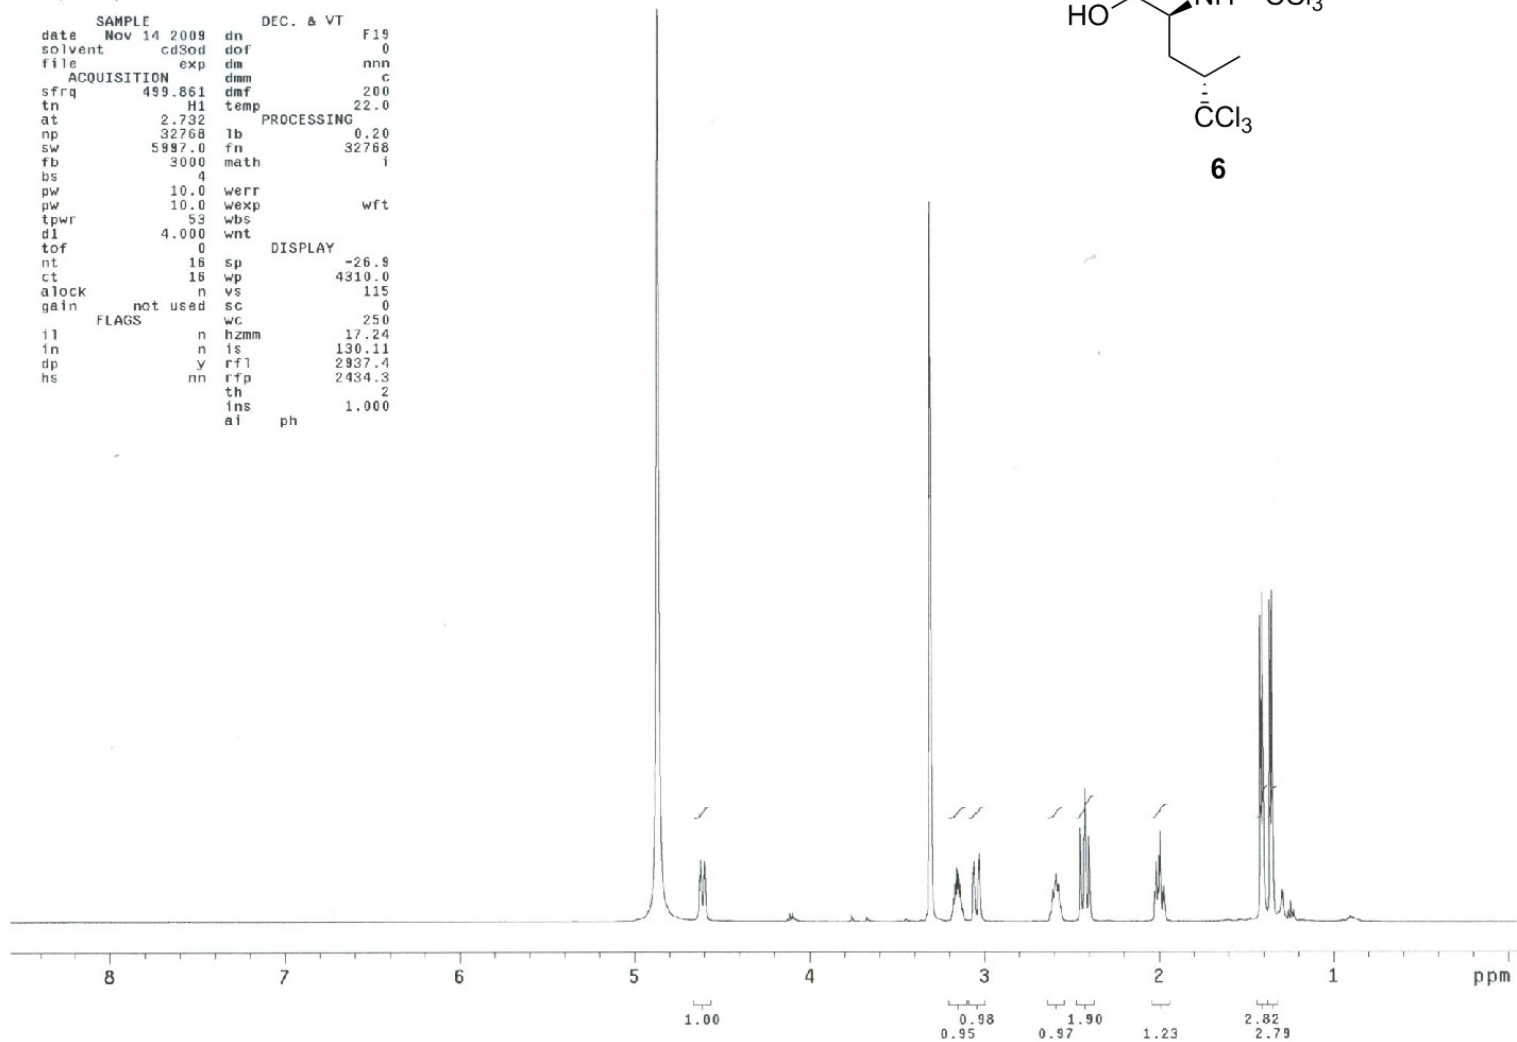

```

snb-2-111-a-13C
exp1 CARBON
SAMPLE
date Nov 19 2009 temp SPECIAL 22.0
solvent cd3od gain 42
file exp spin 20
ACQUISITION hst 0.008
sw 36003.6 pws0 9.200
at 1.300 alfa 10.000
np 93644 FLAGS
fb 20000 i1 n
bs 4 in n
dl 1.000 dp y
nt 100000 hs nn
ct 2345 PROCESSING
tn C13 lb 0.50
sfrq 125.702 fn not used
tof 865.4 sp DISPLAY -953.8
tpwr 56 wp 25788.6
pw 9.200 rfl 11207.2
DECOUPLER rfp 6177.6
dn H1 rp -53.9
dof 0 lp -273.0
dm nny PLOT
decwave wc 250
dpwr 36 sc 0
dmf 10104 vs 11784
th 5
ai cdc ph

```

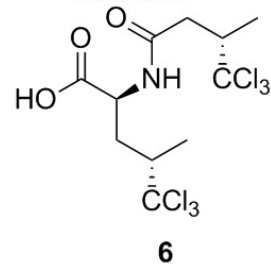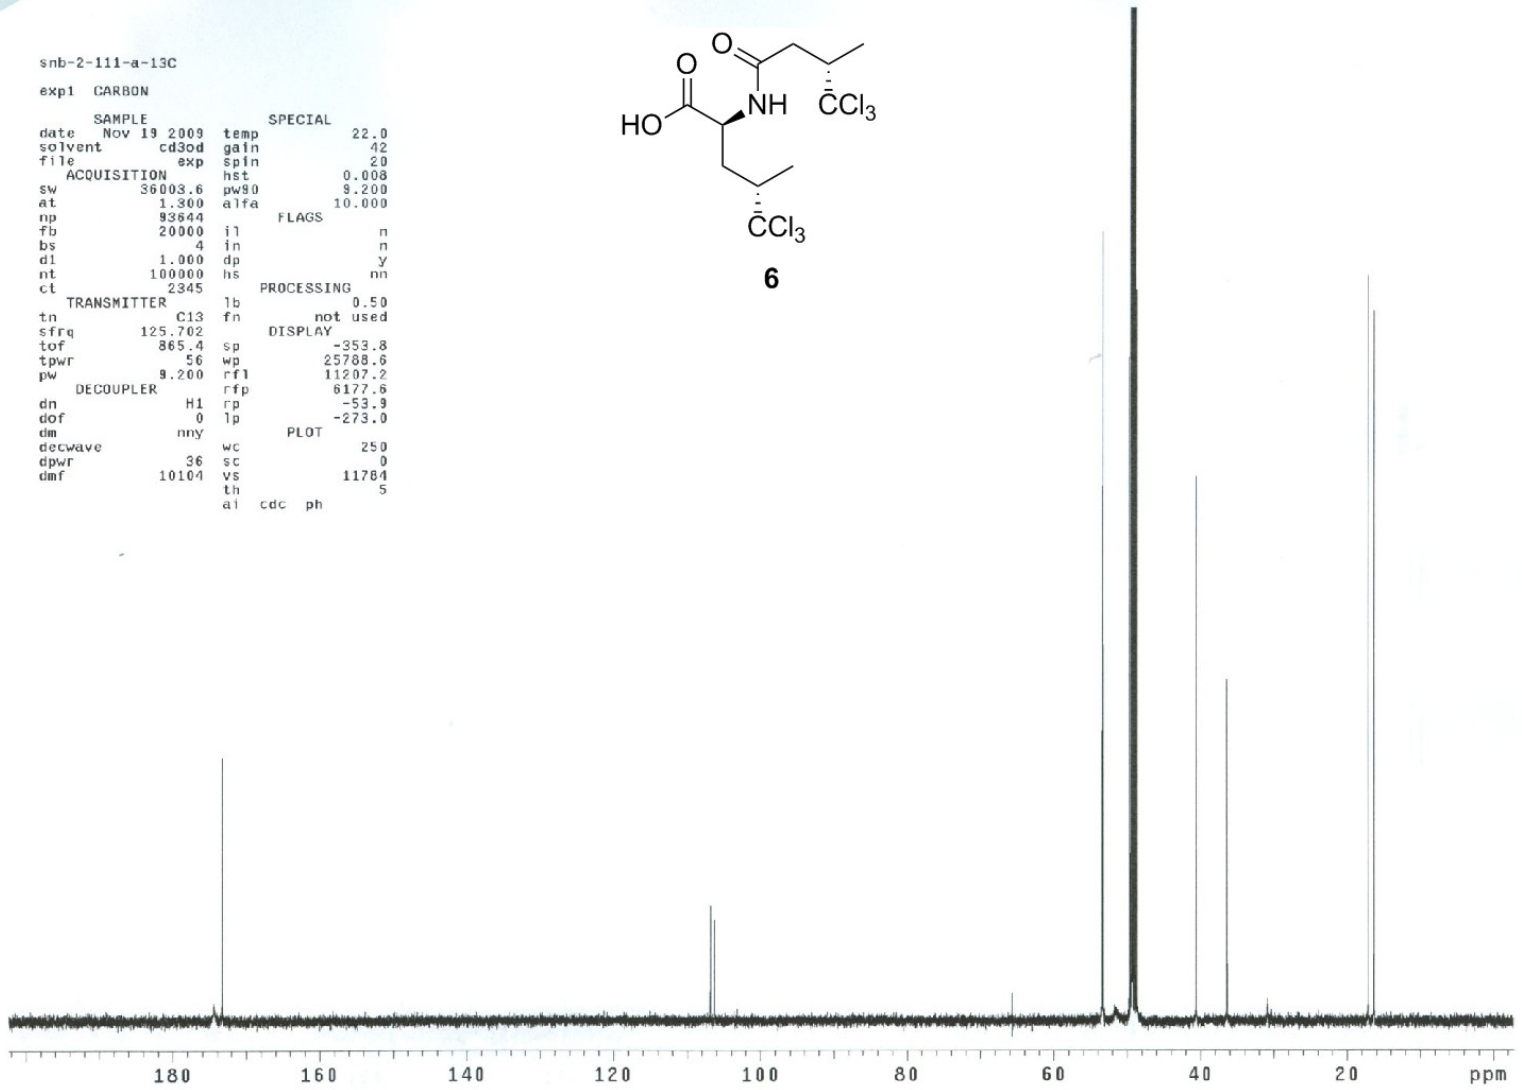



```

exp1 s2pu1
SAMPLE
date Nov 24 2009 dn F19
solvent c6d6 dof 0
file exp dm nnn
ACQUISITION dmm c
sfrq 499.859 dmf 200
tn H1 temp 22.0
at 2.732 PROCESSING
np 32768 fn 32768
sw 5997.0 math i
fb 3000
bs 4 werr
pw 10.0 wexp wft
pw 10.0 wbs
tpwr 53 wnt
d1 10.000 DISPLAY
tof 0 sp 152.4
nt 8 wp 4300.1
ct 8 vs 102
alock n sc 0
gain not used wc 250
FLAGS n hzmm 17.20
il n is 1048.44
in n rfl 4086.7
dp y rfp 3629.0
hs nn th 3
ins 1.000
ai ph

```

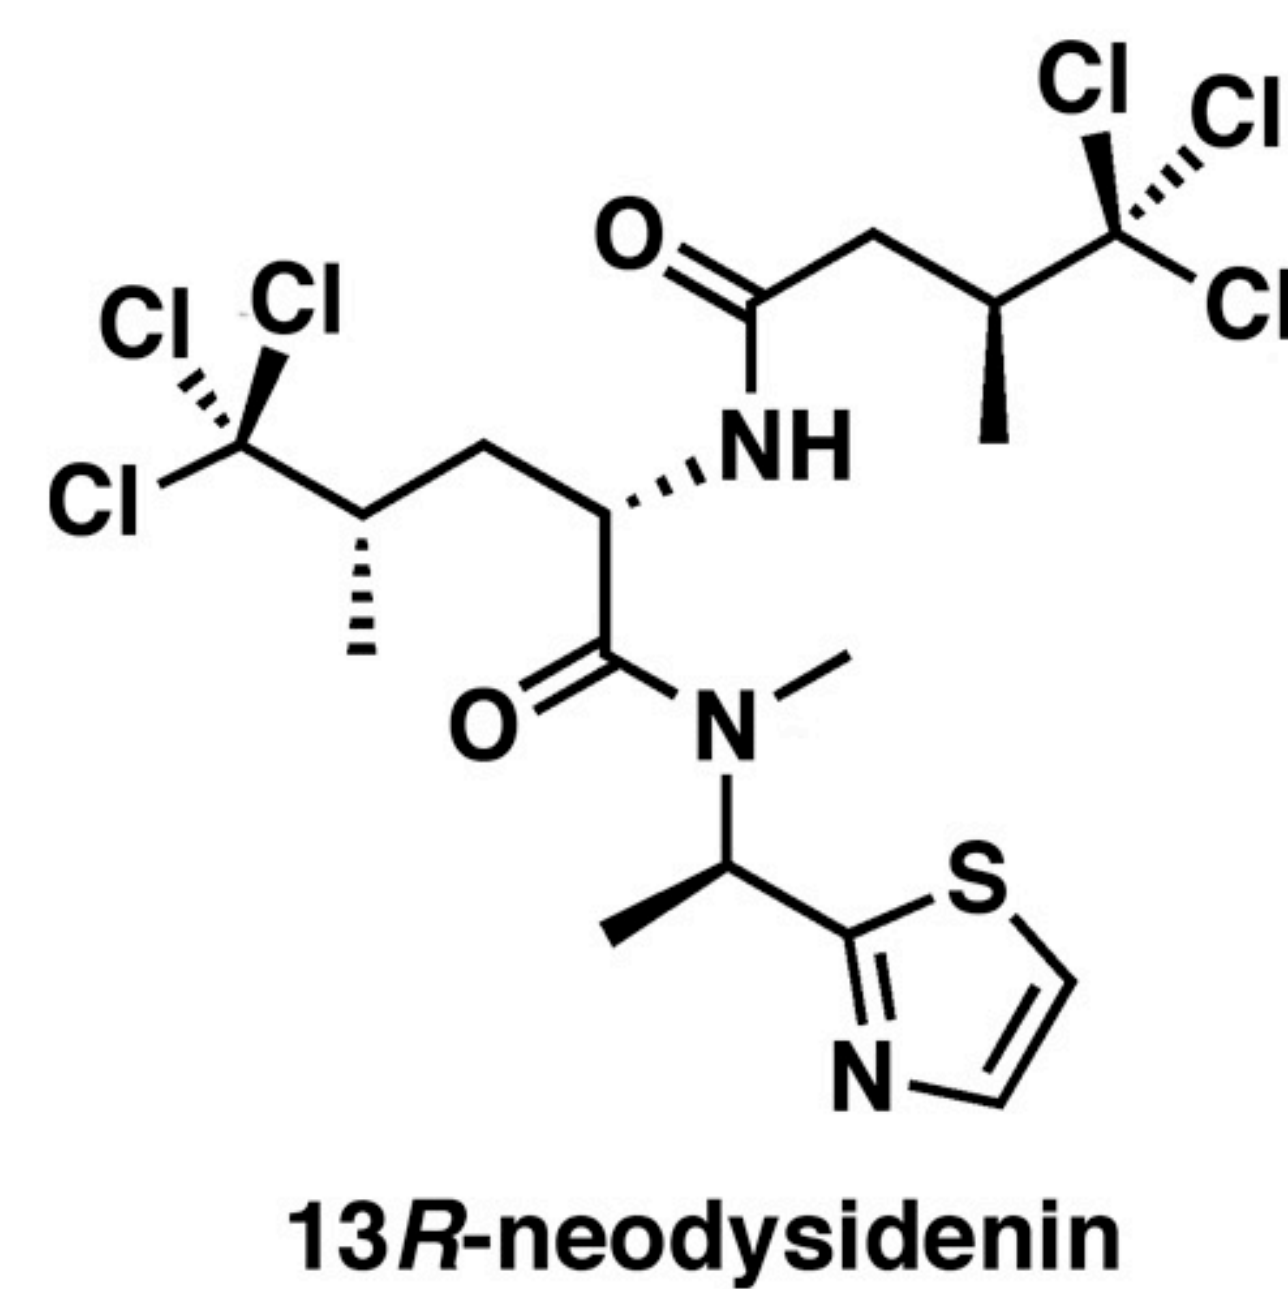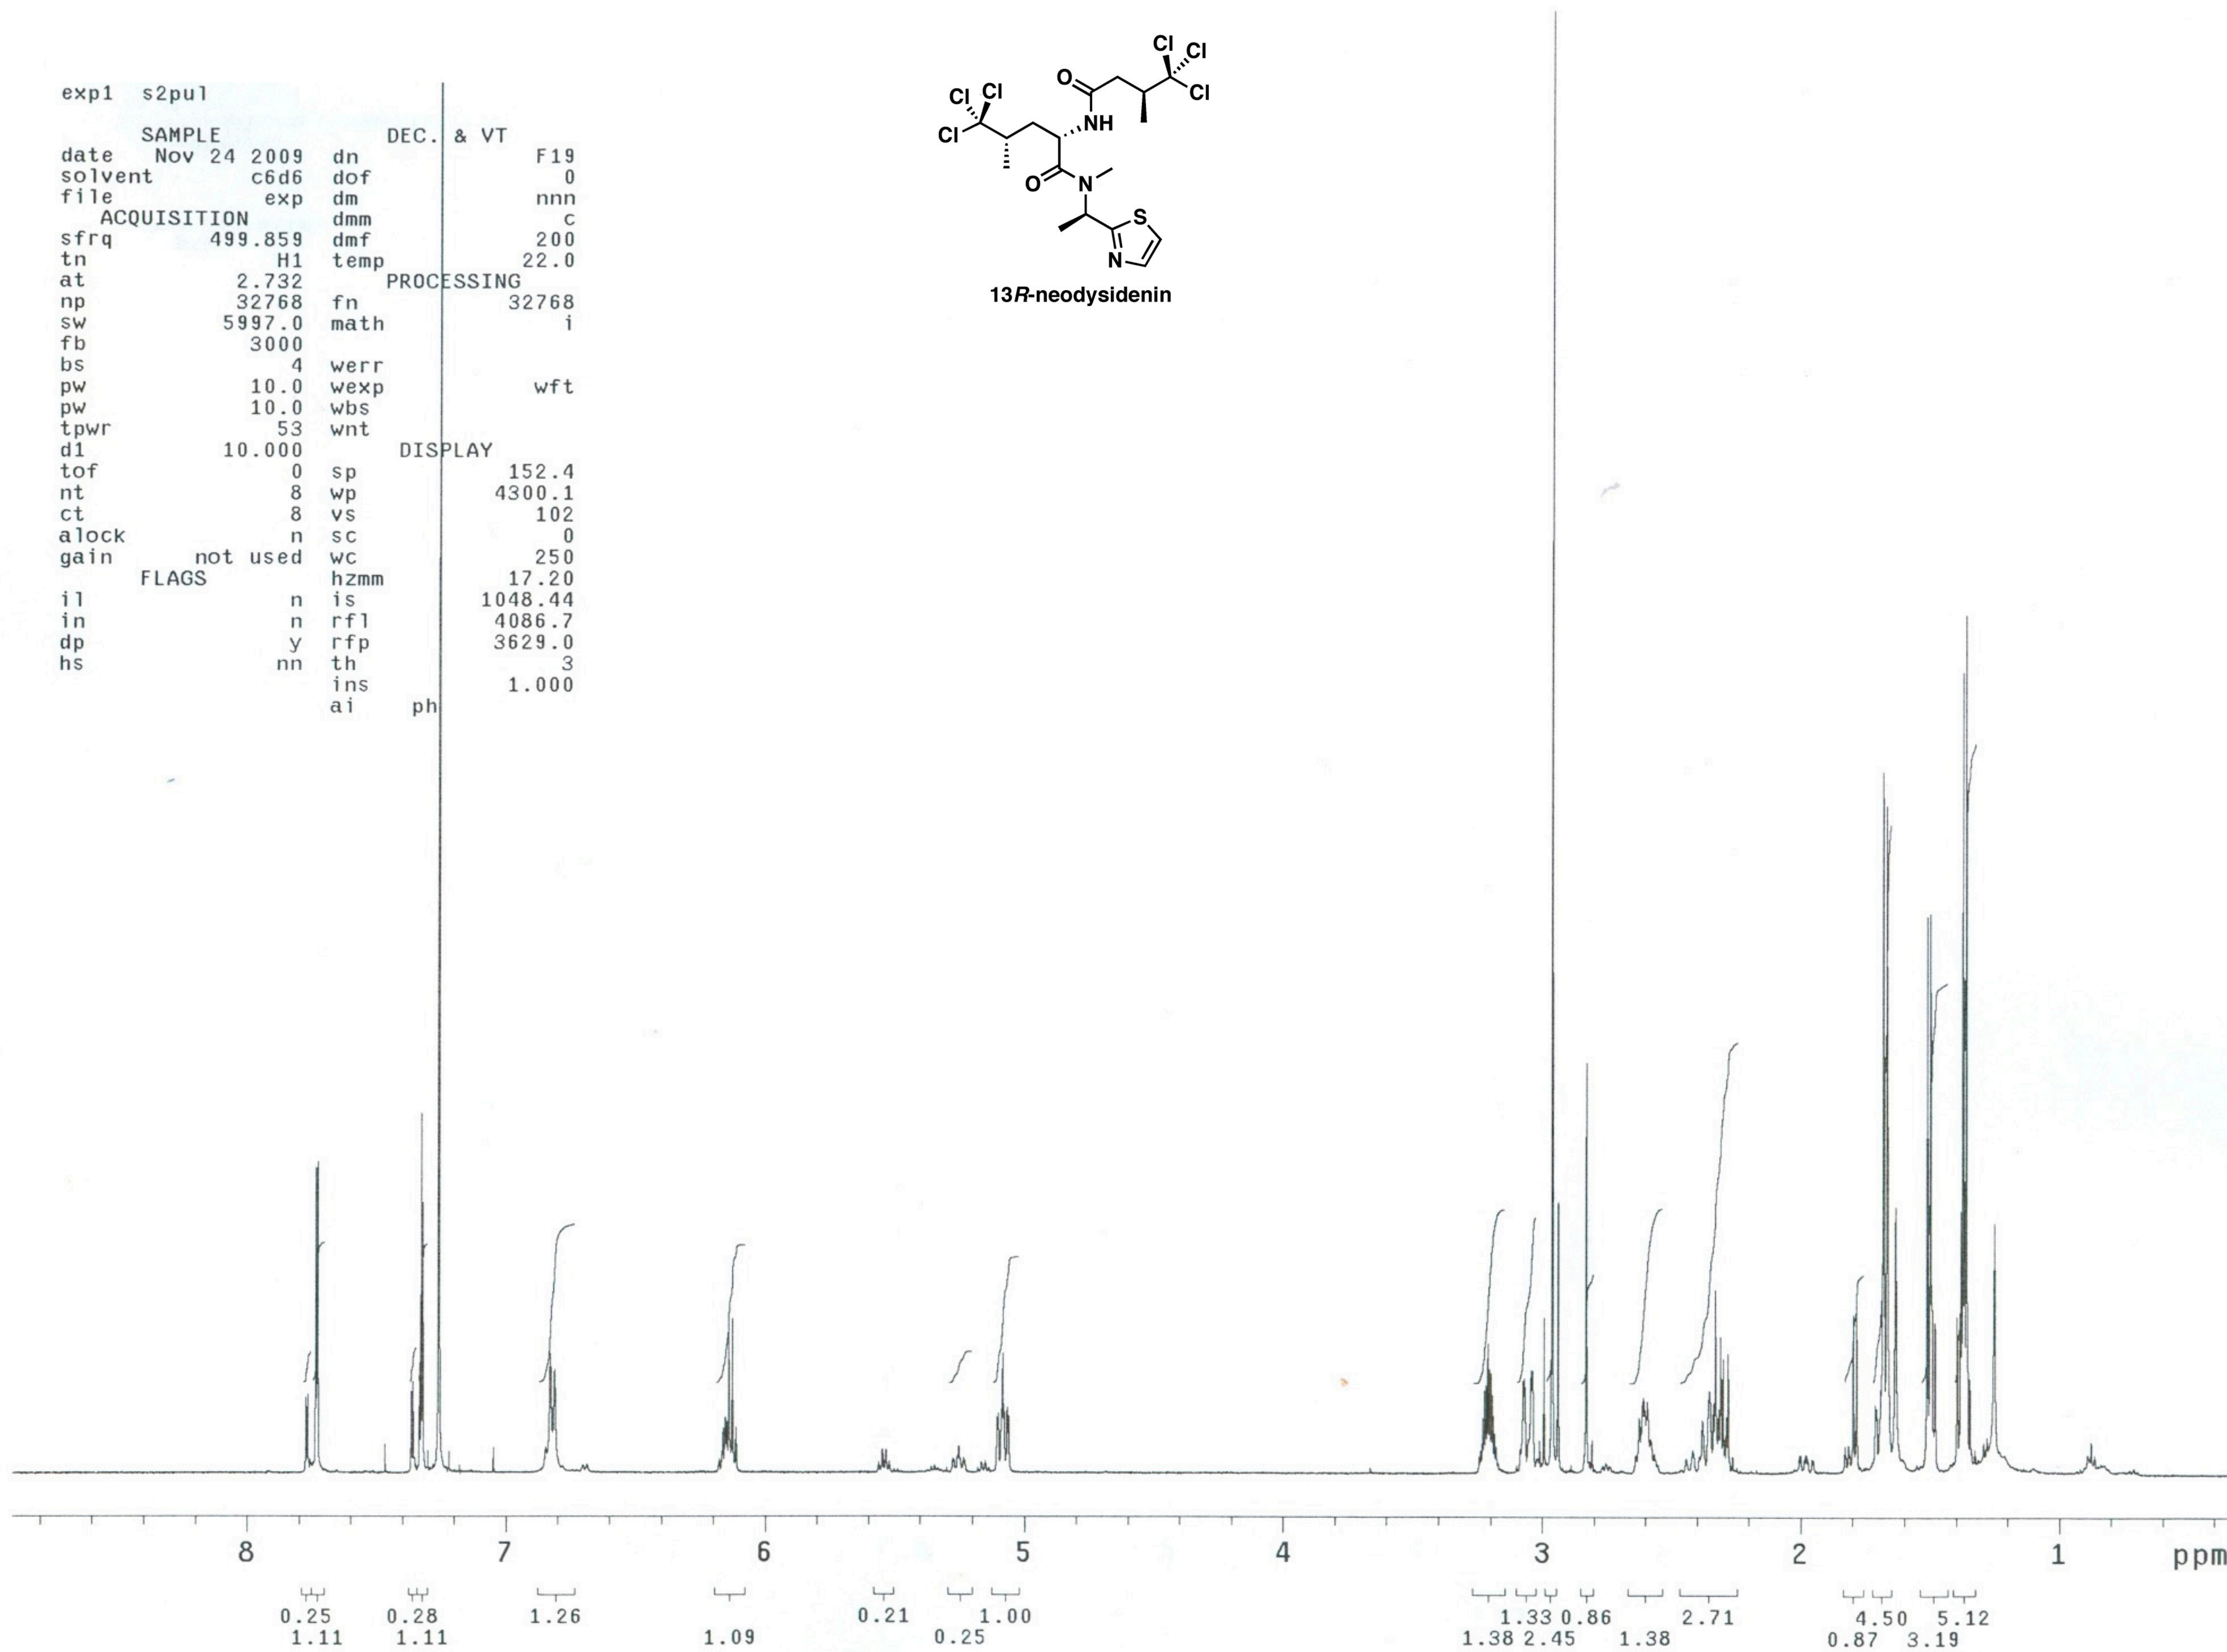



5-147-a-c13

exp2 CARBON

| SAMPLE      |             | SPECIAL    |          |
|-------------|-------------|------------|----------|
| date        | Nov 24 2009 | temp       | not used |
| solvent     | CDC13       | gain       | 42       |
| file        | exp         | spin       | 20       |
| ACQUISITION |             | SPECIAL    |          |
| sw          | 32000.0     | hst        | 0.008    |
| at          | 1.300       | pw90       | 9.200    |
| np          | 83230       | alfa       | 10.000   |
| fb          | 18000       | FLAGS      |          |
| bs          | 4           | il         | n        |
| d1          | 0.200       | in         | n        |
| nt          | 100000      | dp         | y        |
| ct          | 4905        | hs         | nn       |
| TRANSMITTER |             | PROCESSING |          |
| tn          | C13         | lb         | 0.50     |
| sfrq        | 125.702     | fn         | not used |
| tof         | 865.4       | DISPLAY    |          |
| tpwr        | 56          | sp         | 668.4    |
| pw          | 9.200       | wp         | 22444.3  |
| DECOUPLER   |             | rfl        | 12903.3  |
| dn          | H1          | rfp        | 9707.0   |
| dof         | 0           | rp         | -84.3    |
| dm          | nny         | lp         | -214.7   |
| decwave     |             | PLOT       |          |
| dpwr        | 36          | wc         | 250      |
| dmf         | 10104       | sc         | 0        |
|             |             | vs         | 20204    |
|             |             | th         |          |
|             |             | ai         | 2        |
|             |             | cdc        | ph       |

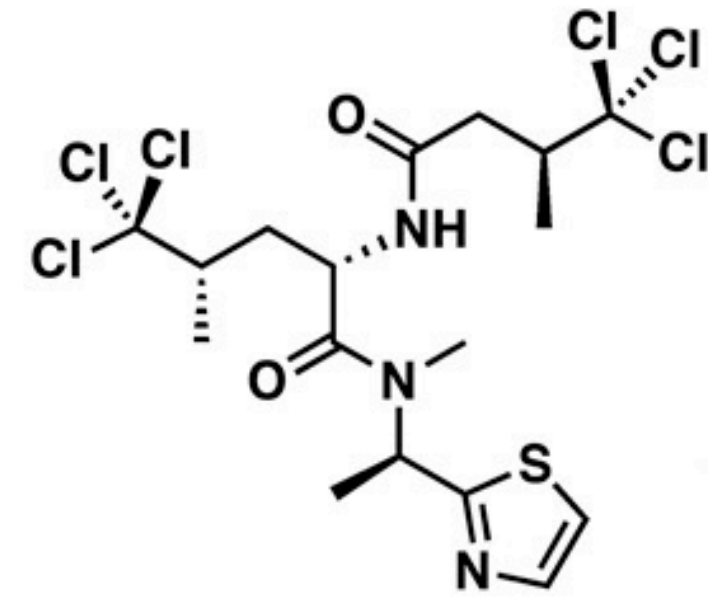

13R-neodysidenin

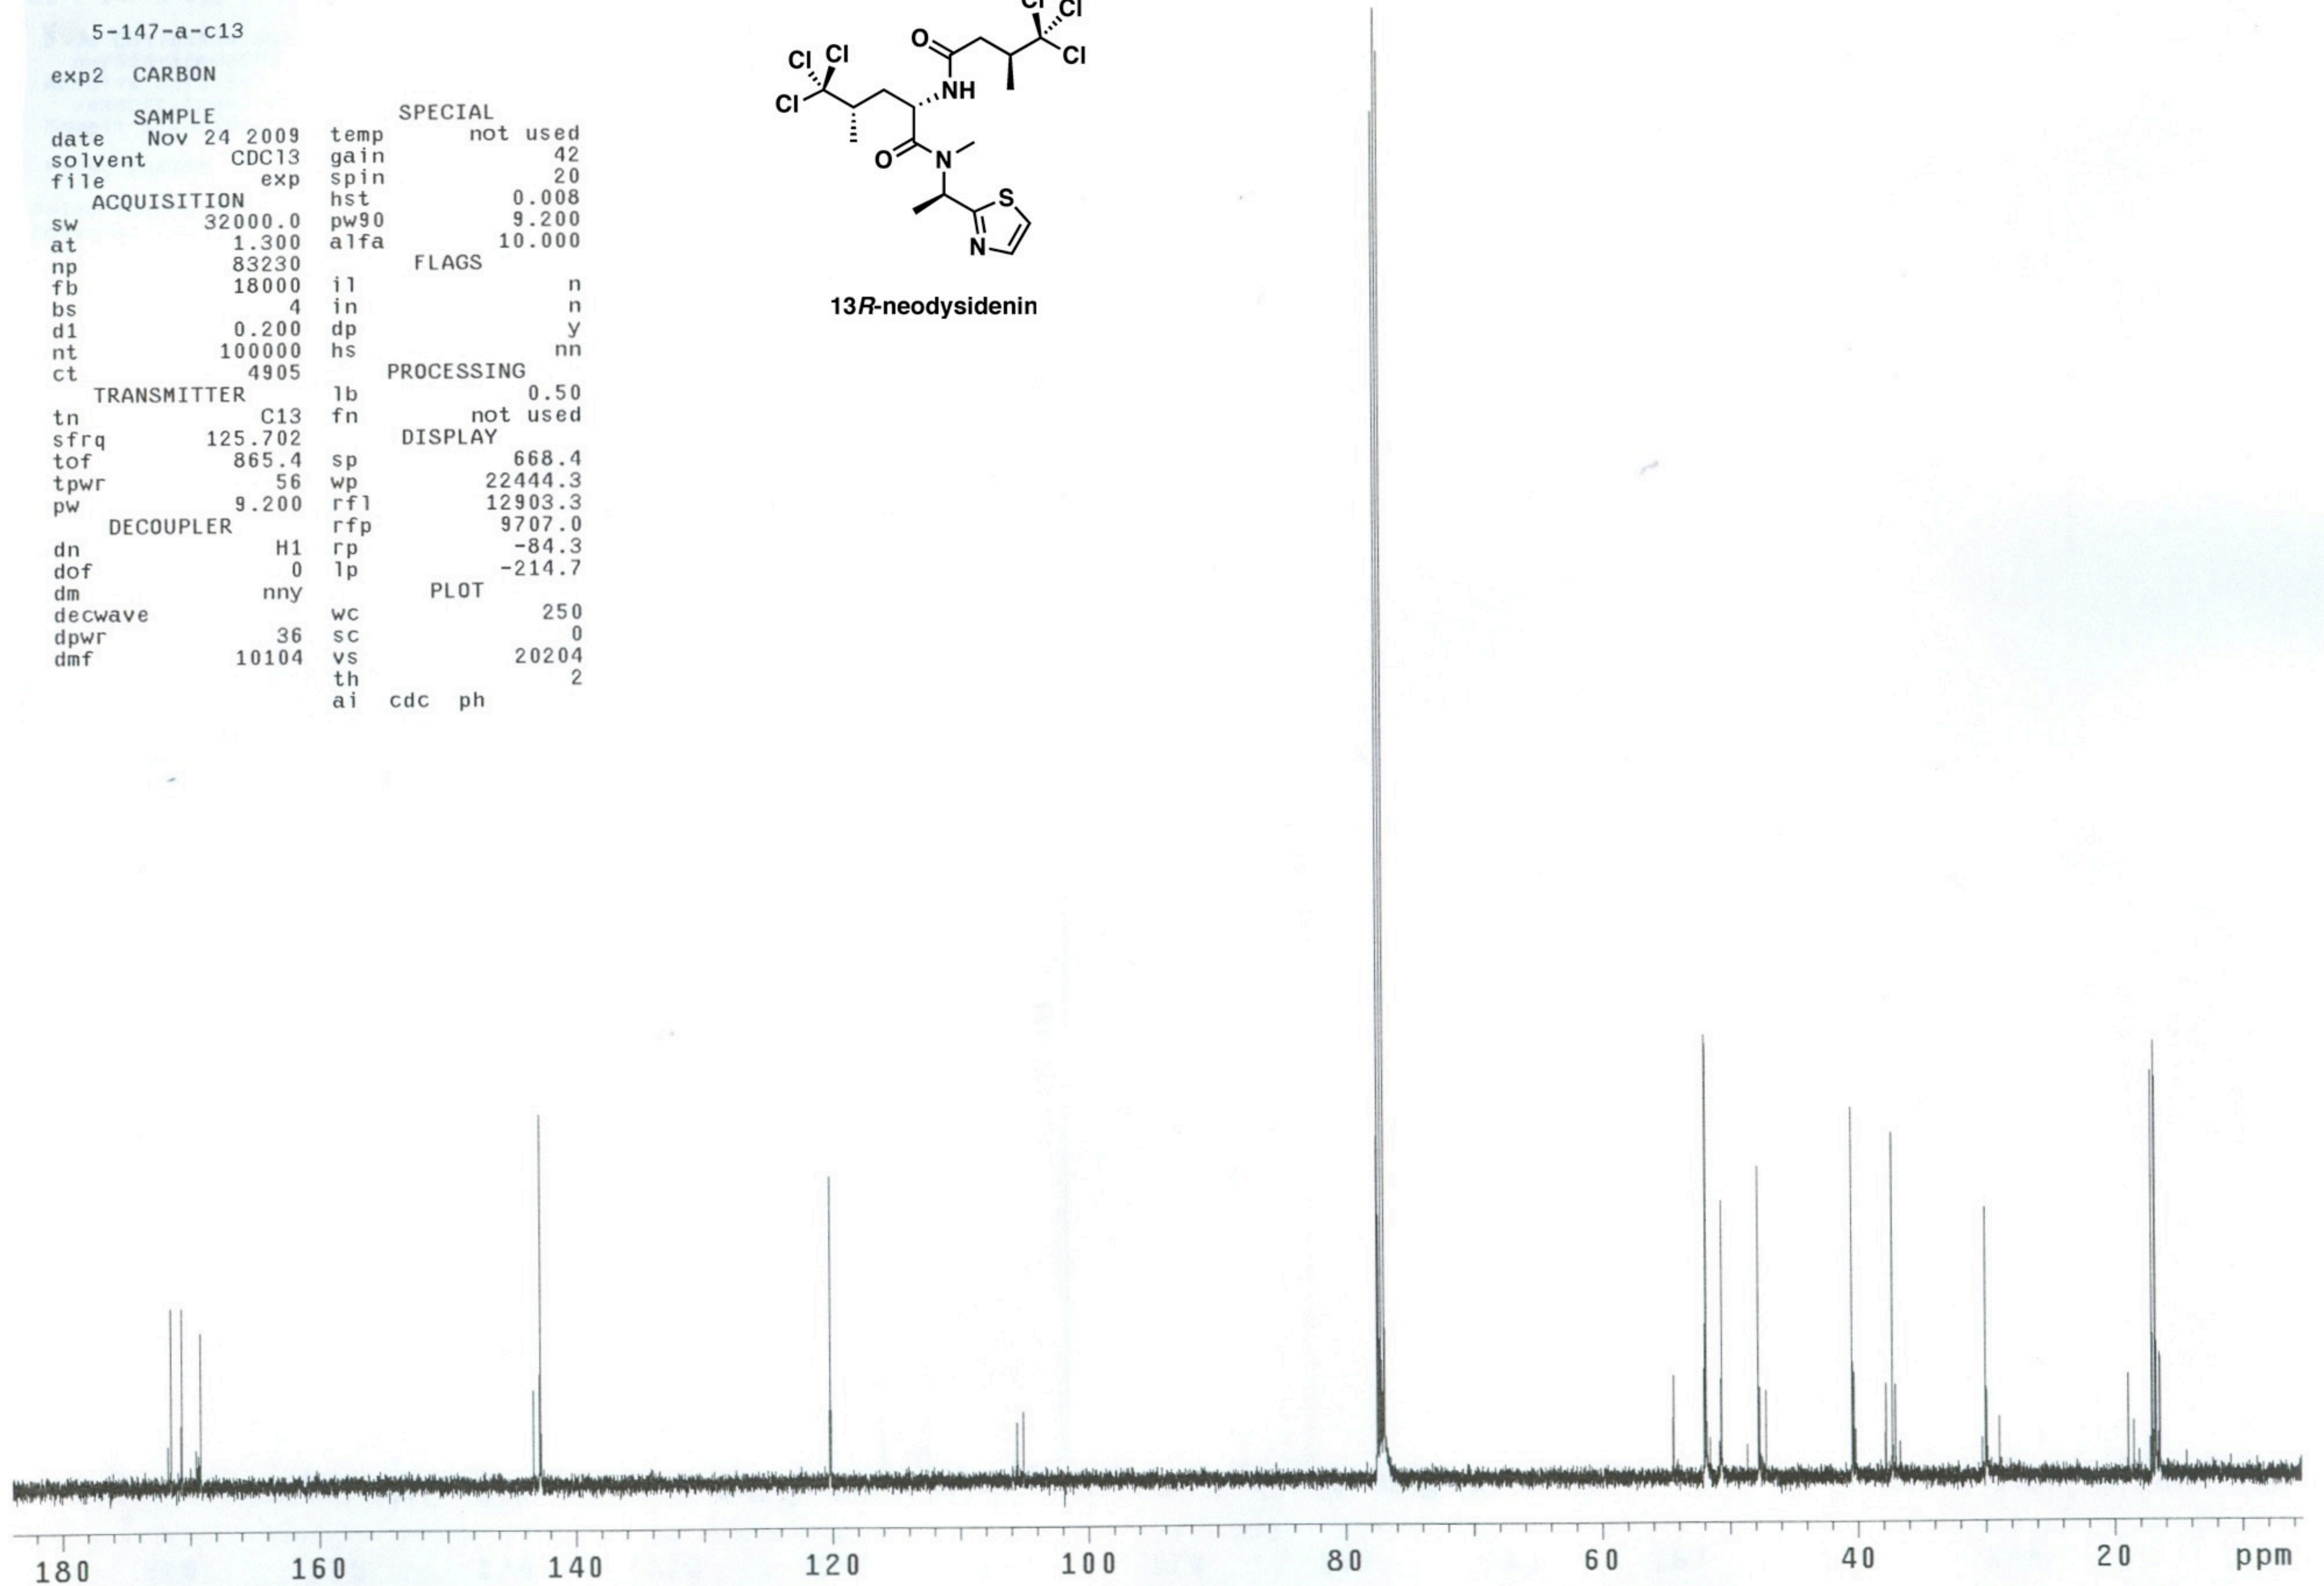



5-154

exp1 s2pu1

|             |            |            |         |
|-------------|------------|------------|---------|
| SAMPLE      |            | DEC. & VT  |         |
| date        | Dec 5 2009 | dn         | F19     |
| solvent     | c6d6       | dof        | 0       |
| file        | exp        | dm         | nnn     |
| ACQUISITION |            | dmm        | c       |
| sfrq        | 499.859    | dmf        | 200     |
| tn          | H1         | temp       | 22.0    |
| at          | 2.732      | PROCESSING |         |
| np          | 32768      | fn         | 32768   |
| sw          | 5997.0     | math       | i       |
| fb          | 3000       |            |         |
| bs          | 4          | werr       |         |
| pw          | 10.0       | wexp       | wft     |
| pw          | 10.0       | wbs        |         |
| tpwr        | 53         | wnt        |         |
| d1          | 8.000      | DISPLAY    |         |
| tof         | 0          | sp         | 276.5   |
| nt          | 64         | wp         | 3819.1  |
| ct          | 64         | vs         | 100     |
| alock       | n          | sc         | 0       |
| gain        | not used   | wc         | 250     |
| FLAGS       |            | hzmm       | 15.28   |
| il          | n          | is         | 1632.16 |
| in          | n          | rfl        | 4086.7  |
| dp          | y          | rfp        | 3629.0  |
| hs          | rn         | th         | 7       |
|             |            | ins        | 1.000   |
|             |            | ai         | ph      |

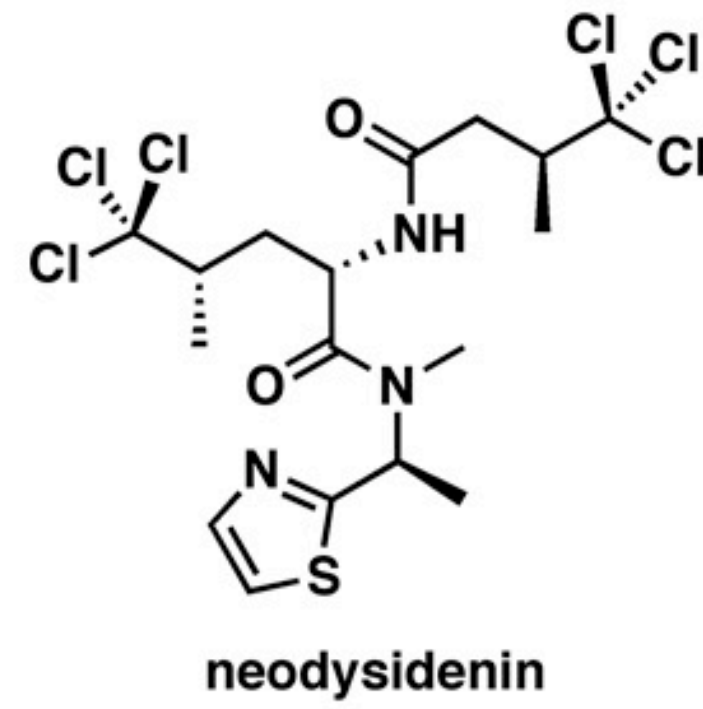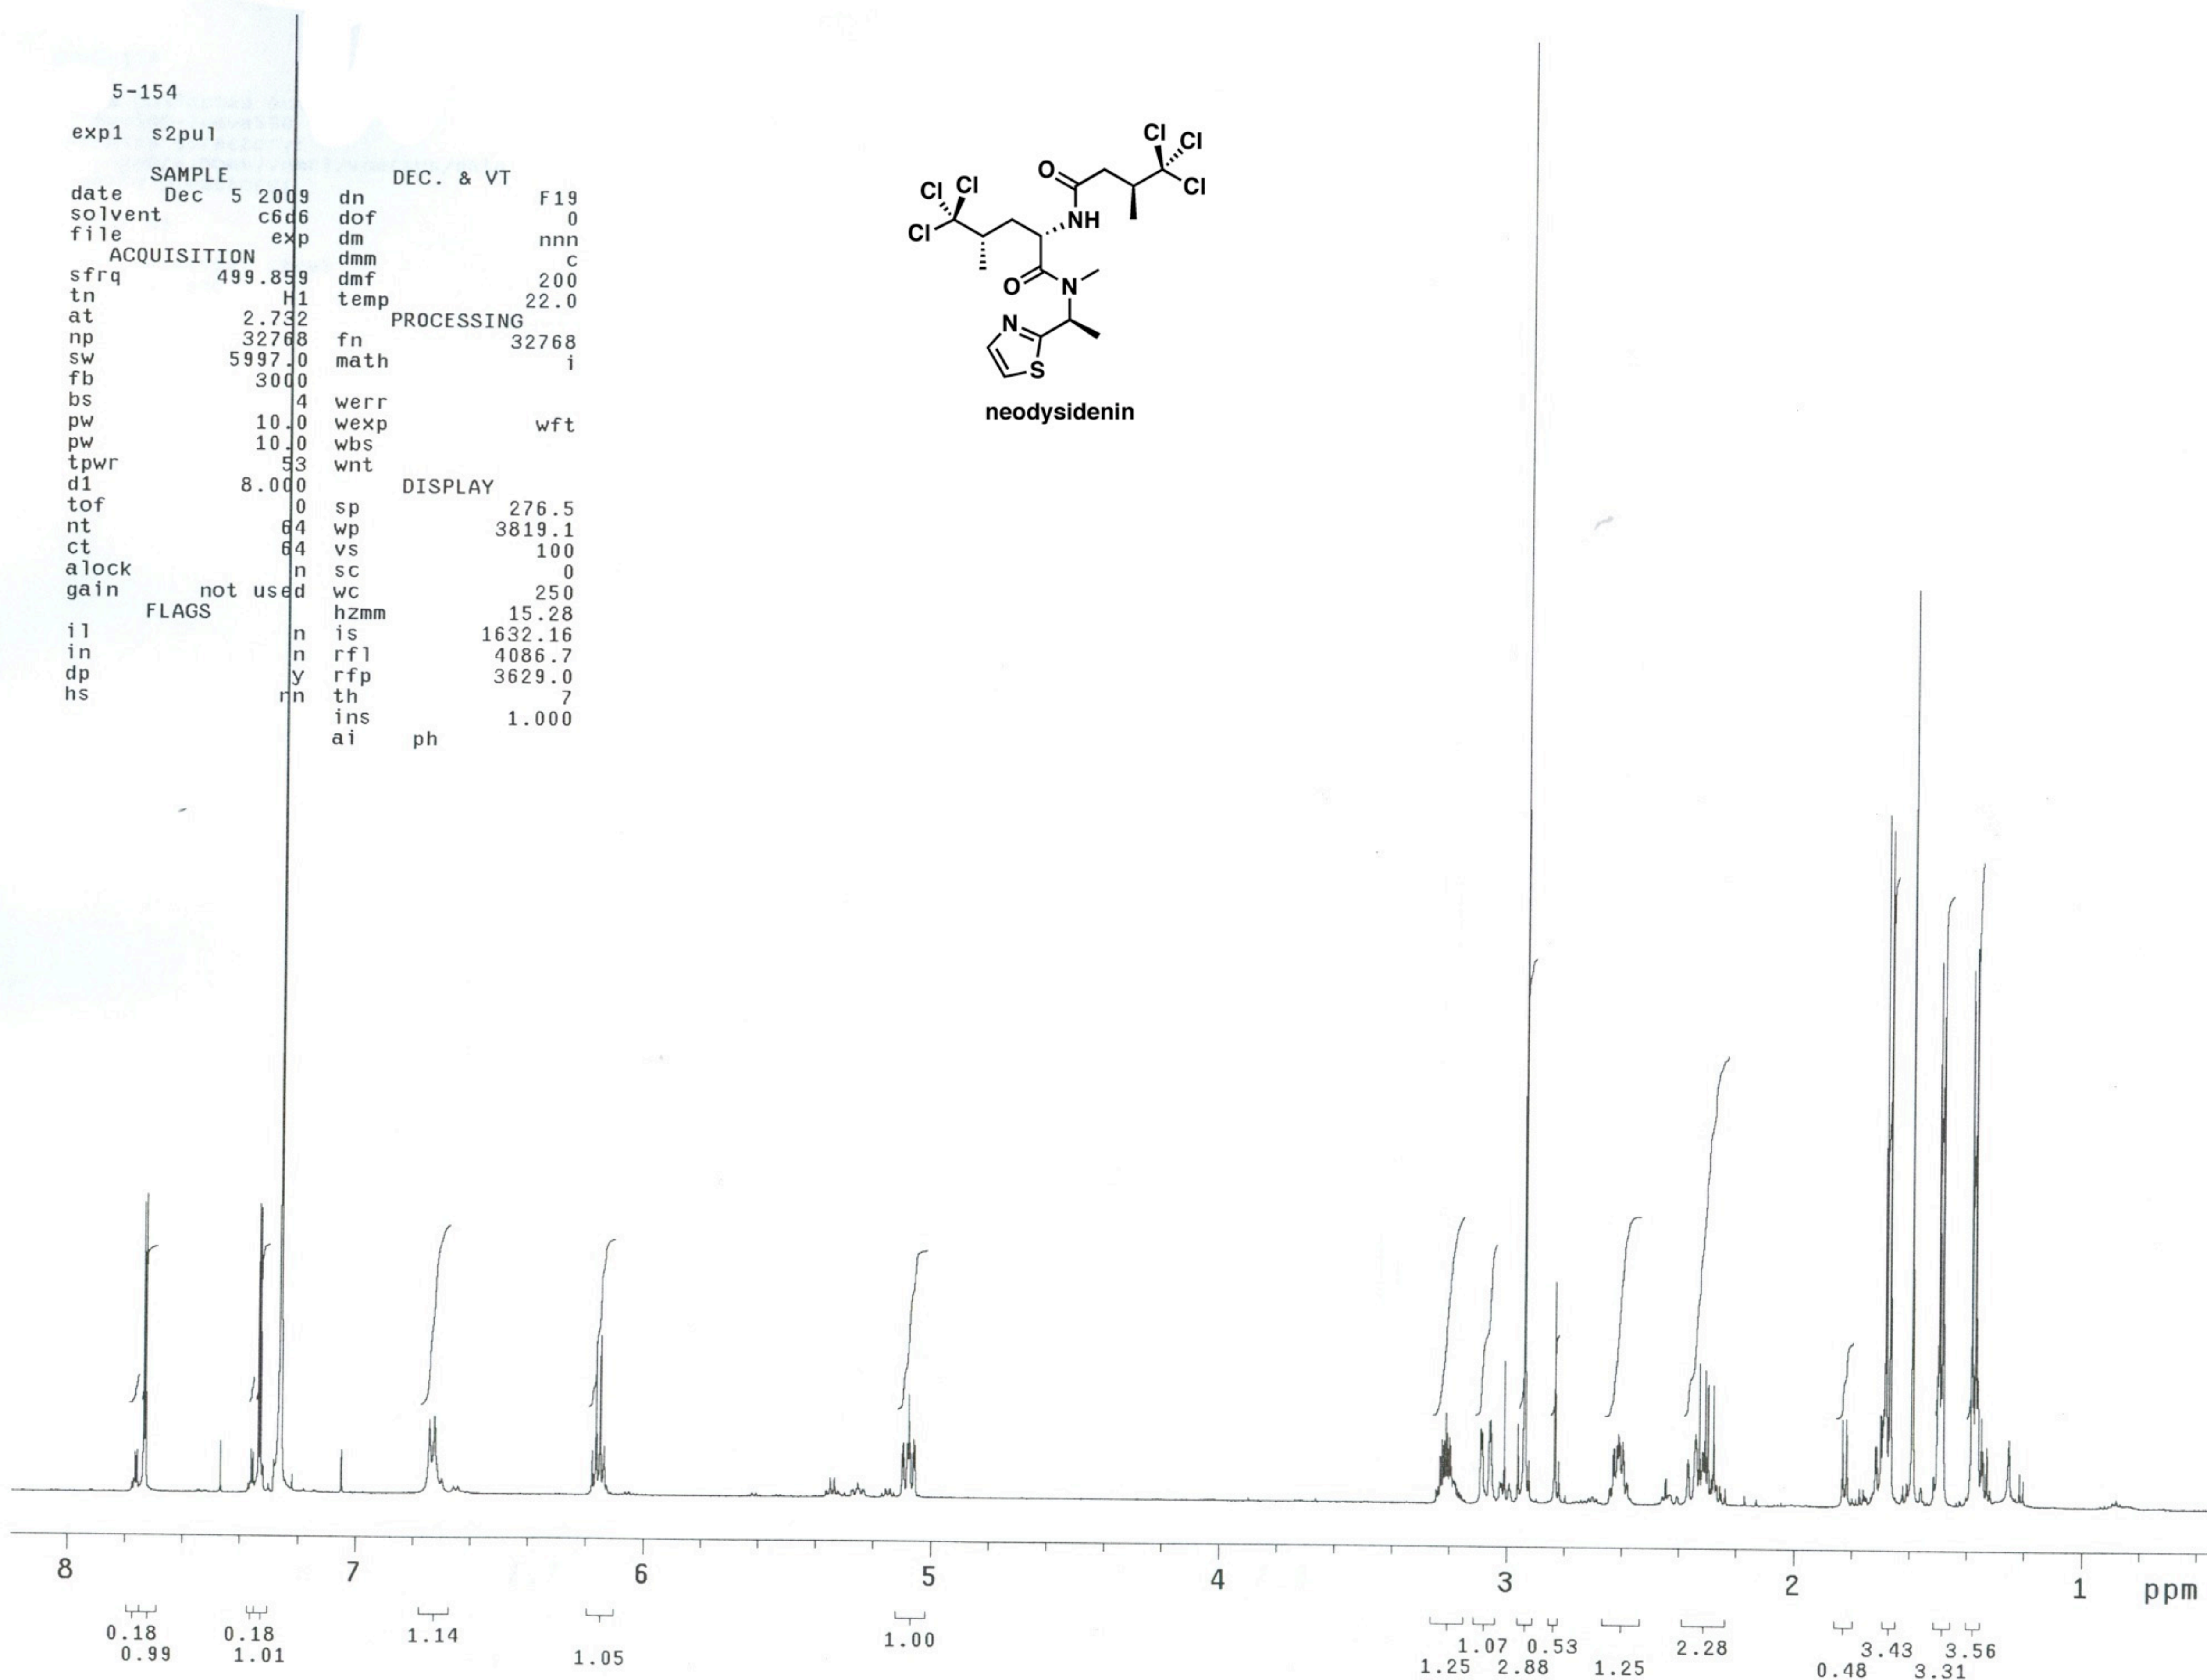



az-5-154-c13

exp2 CARBON

| SAMPLE      |            | SPECIAL    |          |
|-------------|------------|------------|----------|
| date        | Dec 5 2009 | temp       | not used |
| solvent     | CDC13      | gain       | 42       |
| file        | exp        | spin       | 20       |
| ACQUISITION |            | SPECIAL    |          |
| sw          | 32000.0    | hst        | 0.008    |
| at          | 1.300      | pw90       | 9.200    |
| np          | 83230      | alfa       | 10.000   |
| fb          | 18000      | FLAGS      |          |
| bs          | 4          | il         | n        |
| d1          | 0.200      | in         | n        |
| nt          | 100000     | dp         | y        |
| ct          | 9268       | hs         | nn       |
| TRANSMITTER |            | PROCESSING |          |
| tn          | C13        | lb         | 0.50     |
| sfrq        | 125.702    | fn         | not used |
| tof         | 865.4      | DISPLAY    |          |
| tpwr        | 56         | sp         | 1118.6   |
| pw          | 9.200      | wp         | 22047.4  |
| DECOUPLER   |            | rfl        | 12902.8  |
| dn          | H1         | rfp        | 9707.0   |
| dof         | 0          | rp         | -81.3    |
| dm          | nny        | lp         | -214.7   |
| decwave     |            | PLOT       |          |
| dpwr        | 36         | wc         | 250      |
| dmf         | 10104      | sc         | 0        |
|             |            | vs         | 27738    |
|             |            | th         | 7        |
|             |            | ai         | cdc ph   |

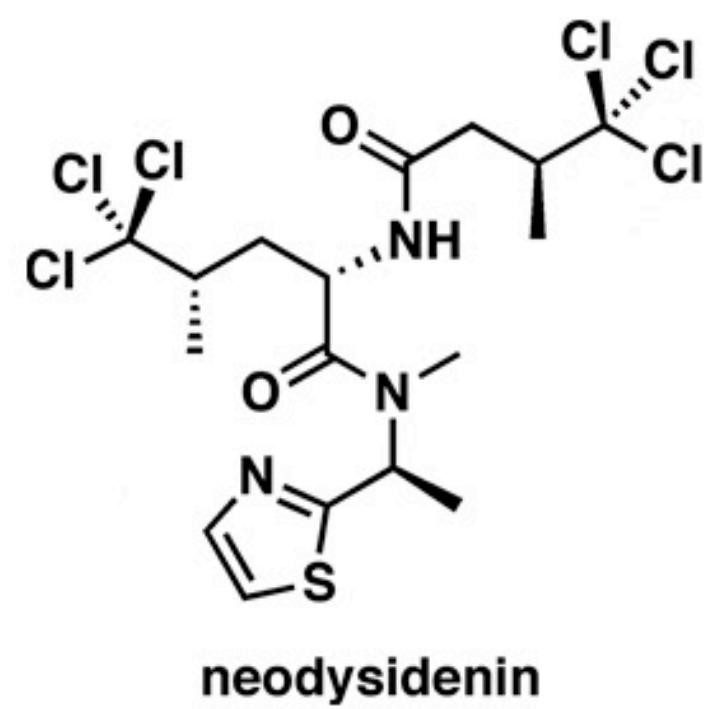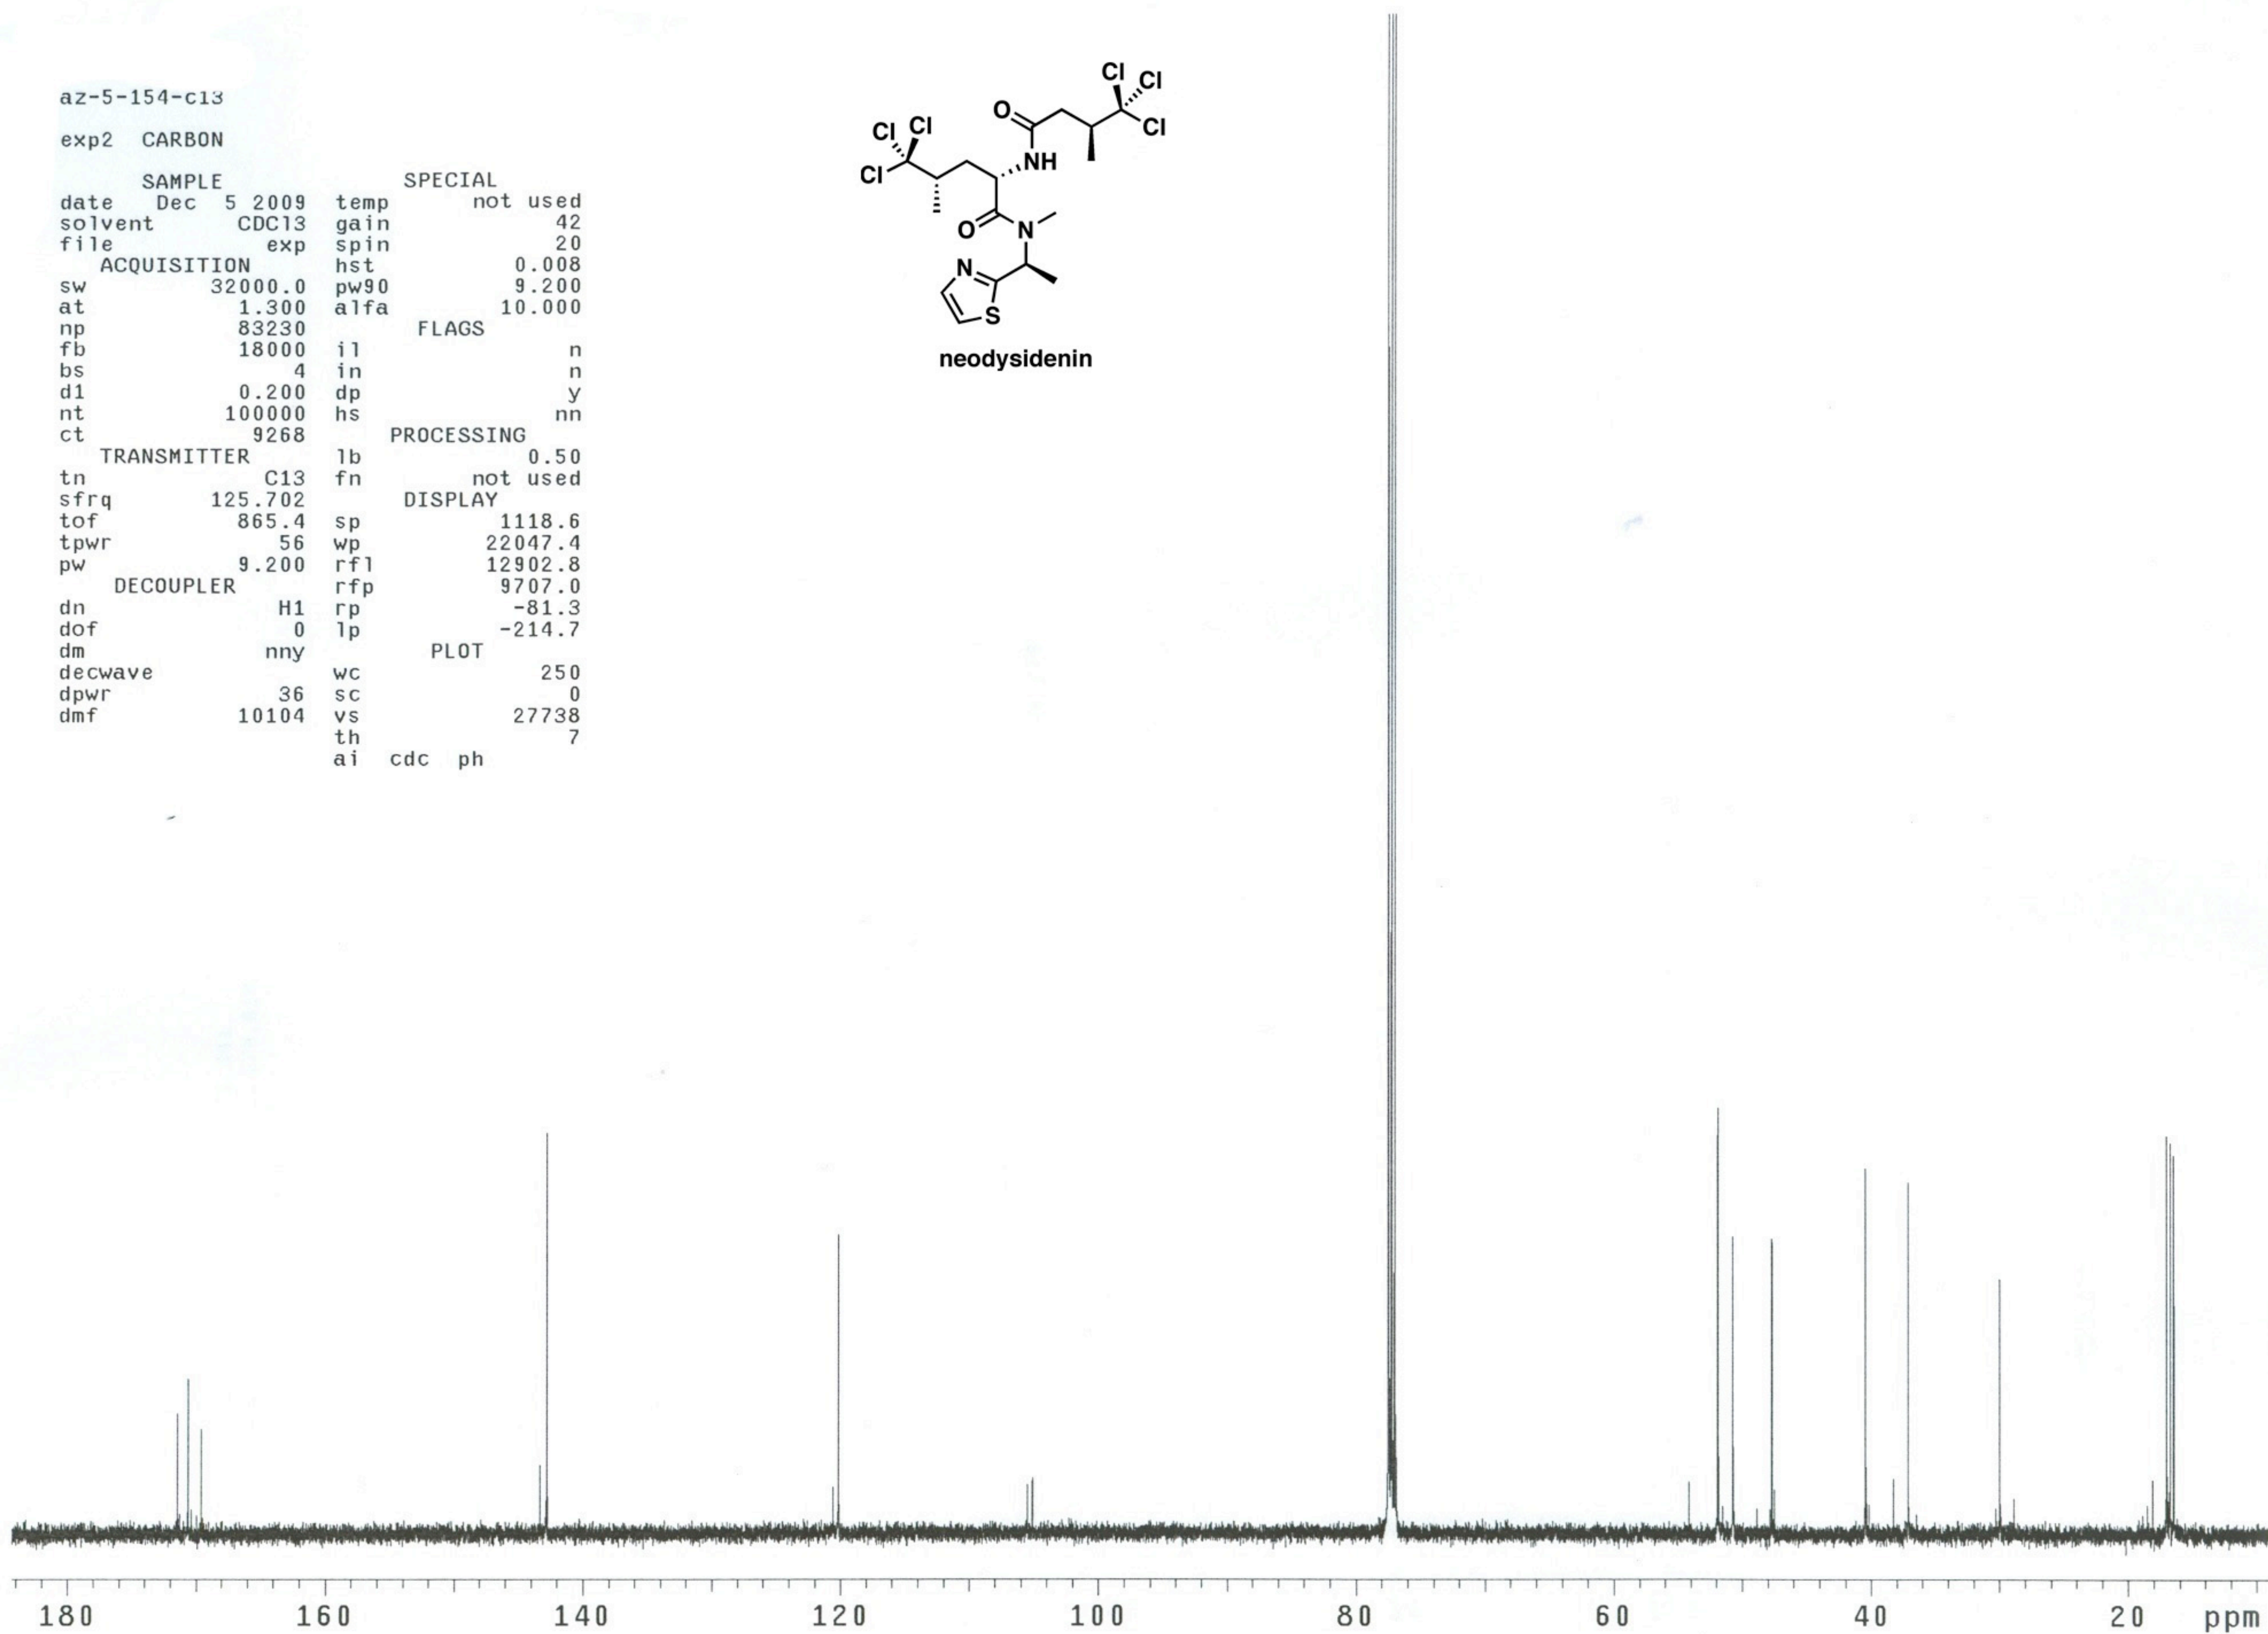

synthetic neodysidenin (500 MHz  $^1\text{H}$  NMR,  $\text{CDCl}_3$ )

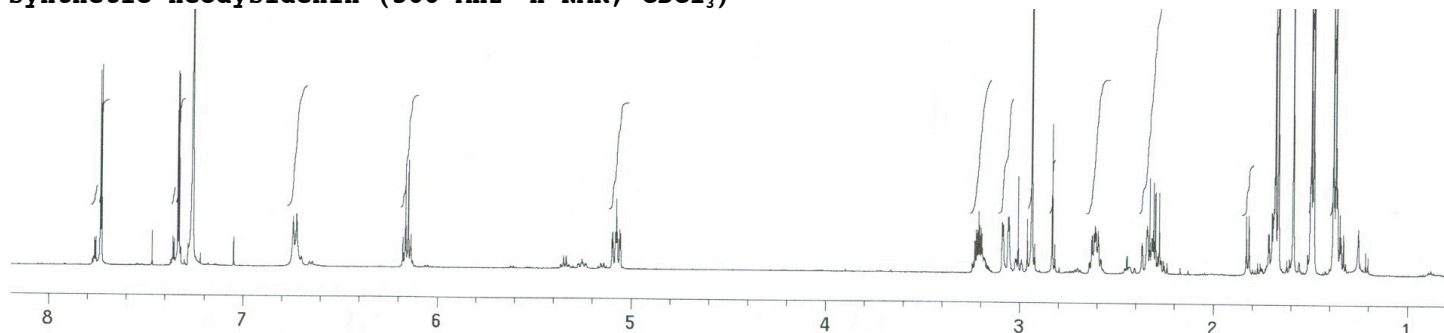

natural neodysidenin (300 MHz  $^1\text{H}$  NMR,  $\text{CDCl}_3$ )

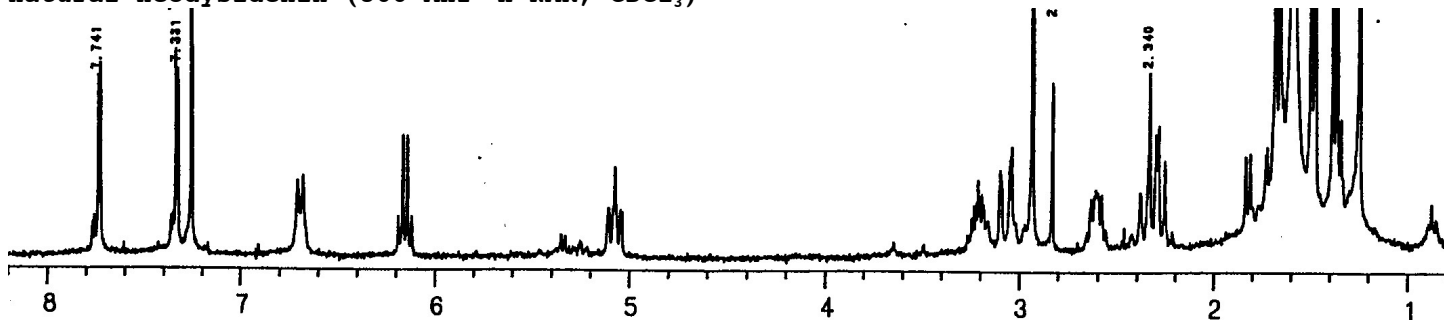

synthetic neodysidenin (125 MHz  $^{13}\text{C}$  NMR,  $\text{CDCl}_3$ )

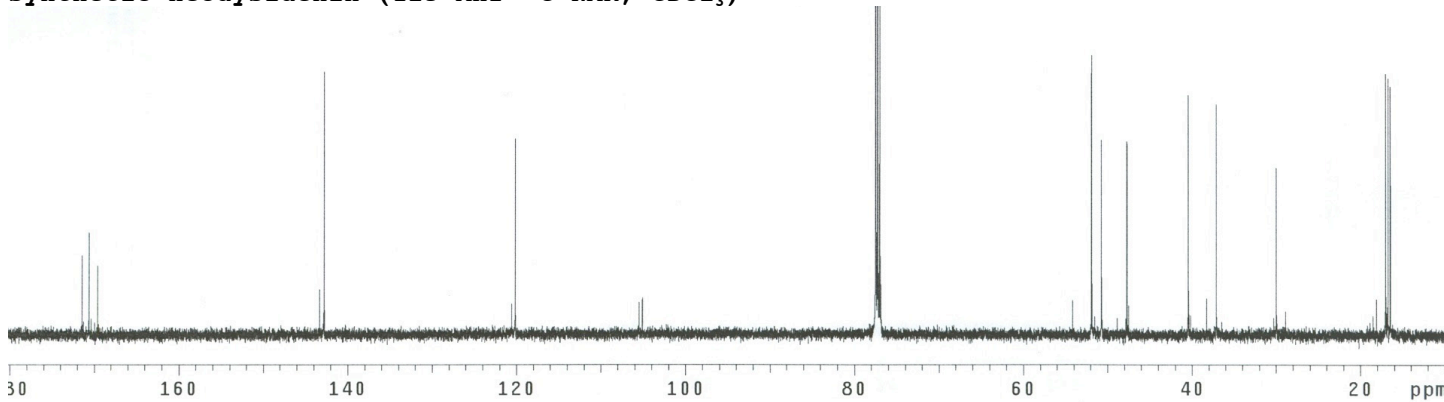

natural neodysidenin (125 MHz  $^{13}\text{C}$  NMR,  $\text{CDCl}_3$ )

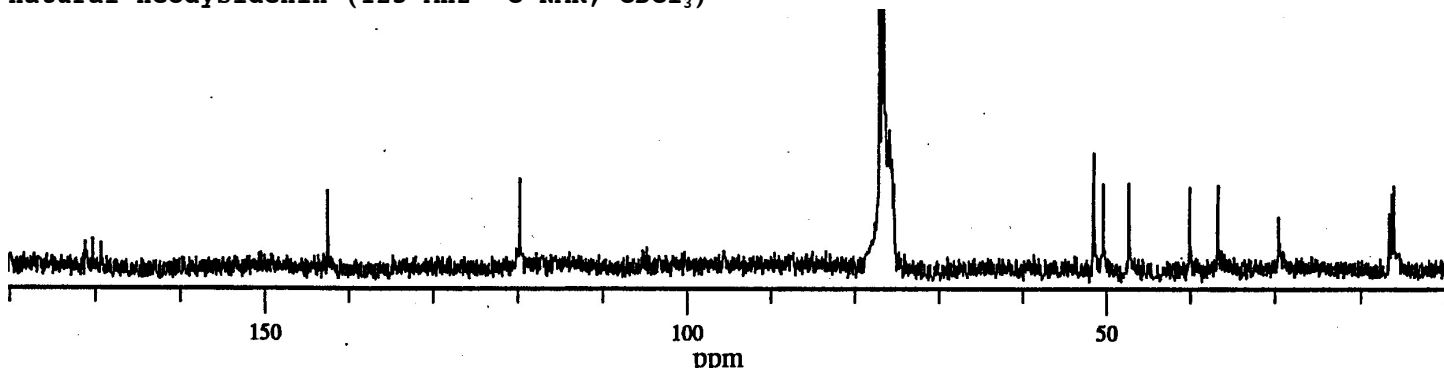

Supplement: NIHMS169677-supplement-SI2.pdf [file NIHMS169677-supplement-SI2.pdf]
